# Supplementary material for: Synthesis of 3,3′-bisindoles via demethylenation
Source: Royal Society of Chemistry journal article supplement (doi:10.1039/d2qo01010k), 2022-01-01
Supplement: d2qo01010k1.pdf [file d2qo01010k1.pdf]

## Supporting Information

### Synthesis of 3,3'-Bisindoles via Demethylenation

Hui Chen,<sup>†</sup> Ranran Cui,<sup>†</sup> Yahui Zhang, Yu Gao\* and Haijun Chen\*

Key Laboratory of Molecule Synthesis and Function Discovery (Fujian Province University), College of Chemistry, Fuzhou University, Fuzhou, Fujian 350116, China

## Table of contents

|                                                                |    |
|----------------------------------------------------------------|----|
| 1. General Information.....                                    | 4  |
| 2. Optimization of Reaction Conditions .....                   | 5  |
| Table S1. Optimization of substrate expansion .....            | 5  |
| Table S2. Optimization of solvents .....                       | 6  |
| Table S3. Optimization of bases .....                          | 7  |
| 3. Emission Spectra Data.....                                  | 8  |
| Emission Spectrum Data for compound 3.....                     | 8  |
| Emission Spectrum Data for compound 4.....                     | 8  |
| Emission Spectrum Data for compound 5.....                     | 9  |
| Emission Spectrum Data for compound 7.....                     | 9  |
| Emission Spectrum Data for compound 12.....                    | 10 |
| Emission Spectrum Data for compound 20 (Solid) .....           | 10 |
| Emission Spectrum Data for compound 20 in THF.....             | 11 |
| Emission Spectrum Data for compound 21.....                    | 11 |
| Emission Spectrum Data for compound 24 (Solid) .....           | 12 |
| Emission Spectrum Data for compound 24 in THF.....             | 12 |
| Normalized Emission Spectra Data for compounds 20 and 24 ..... | 13 |
| 4. Mechanism Studies .....                                     | 14 |
| 5. General Procedures.....                                     | 16 |
| Compound 2.....                                                | 16 |
| Compound 3.....                                                | 17 |
| Compound 4.....                                                | 18 |
| Compound 5.....                                                | 19 |
| Compound 6.....                                                | 20 |
| Compound 7.....                                                | 21 |
| Compound 8.....                                                | 22 |
| Compound 9.....                                                | 23 |
| Compound 10.....                                               | 24 |
| Compound 11.....                                               | 26 |
| Compound 12.....                                               | 27 |
| Compound 13.....                                               | 28 |
| Compound 14.....                                               | 29 |
| Compound 15.....                                               | 30 |
| Compound 16.....                                               | 31 |
| Compound 17.....                                               | 32 |
| Compound 18.....                                               | 33 |
| Compound 19.....                                               | 34 |
| Compound 20.....                                               | 35 |
| Compound 21.....                                               | 36 |
| Compound 22.....                                               | 37 |
| Compound 23.....                                               | 38 |
| Compound 24.....                                               | 39 |

|                                                    |    |
|----------------------------------------------------|----|
| 6. NMR Spectra .....                               | 40 |
| <sup>1</sup> H NMR Spectrum of 2 .....             | 40 |
| <sup>13</sup> C NMR Spectrum of 2 .....            | 40 |
| <sup>1</sup> H NMR Spectrum of 3 .....             | 41 |
| <sup>13</sup> C NMR Spectrum of 3 .....            | 41 |
| <sup>13</sup> C NMR Spectrum (dept 135) of 3 ..... | 42 |
| <sup>1</sup> H NMR Spectrum of 4 .....             | 43 |
| <sup>13</sup> C NMR Spectrum of 4 .....            | 43 |
| <sup>13</sup> C NMR Spectrum (dept 135) of 4 ..... | 44 |
| <sup>1</sup> H NMR Spectrum of 5 .....             | 45 |
| <sup>13</sup> C NMR Spectrum of 5 .....            | 45 |
| <sup>1</sup> H NMR Spectrum of 6 .....             | 46 |
| <sup>13</sup> C NMR Spectrum of 6 .....            | 46 |
| <sup>1</sup> H NMR Spectrum of 7 .....             | 47 |
| <sup>13</sup> C NMR Spectrum of 7 .....            | 47 |
| <sup>1</sup> H NMR Spectrum of 8 .....             | 48 |
| <sup>13</sup> C NMR Spectrum of 8 .....            | 48 |
| <sup>1</sup> H NMR Spectrum of 9 .....             | 49 |
| <sup>13</sup> C NMR Spectrum of 9 .....            | 49 |
| <sup>1</sup> H NMR Spectrum of 10 .....            | 50 |
| <sup>13</sup> C NMR Spectrum of 10 .....           | 50 |
| <sup>1</sup> H NMR Spectrum of 11 .....            | 51 |
| <sup>13</sup> C NMR Spectrum of 11 .....           | 51 |
| <sup>19</sup> F NMR Spectrum of 11 .....           | 52 |
| <sup>1</sup> H NMR Spectrum of 12 .....            | 53 |
| <sup>13</sup> C NMR Spectrum of 12 .....           | 53 |
| <sup>1</sup> H NMR Spectrum of 13 .....            | 54 |
| <sup>13</sup> C NMR Spectrum of 13 .....           | 54 |
| <sup>1</sup> H NMR Spectrum of 14 .....            | 55 |
| <sup>13</sup> C NMR Spectrum of 14 .....           | 55 |
| <sup>1</sup> H NMR Spectrum of 15 .....            | 56 |
| <sup>13</sup> C NMR Spectrum of 15 .....           | 56 |
| <sup>1</sup> H NMR Spectrum of 16 .....            | 57 |
| <sup>13</sup> C NMR Spectrum of 16 .....           | 57 |
| <sup>1</sup> H NMR Spectrum of 17 .....            | 58 |
| <sup>13</sup> C NMR Spectrum of 17 .....           | 58 |
| <sup>19</sup> F NMR Spectrum of 17 .....           | 59 |
| <sup>1</sup> H NMR Spectrum of 18 .....            | 60 |
| <sup>13</sup> C NMR Spectrum of 18 .....           | 60 |
| <sup>1</sup> H NMR Spectrum 19 .....               | 61 |
| <sup>13</sup> C NMR Spectrum of 19 .....           | 61 |
| <sup>1</sup> H NMR Spectrum of 20 .....            | 62 |
| <sup>13</sup> C NMR Spectrum of 20 .....           | 62 |
| <sup>1</sup> H NMR Spectrum of 21 .....            | 63 |

|                                                   |    |
|---------------------------------------------------|----|
| <sup>13</sup> C NMR Spectrum of 21 .....          | 63 |
| <sup>1</sup> H NMR Spectrum of 22 .....           | 64 |
| <sup>13</sup> C NMR Spectrum of 22 .....          | 64 |
| <sup>1</sup> H NMR Spectrum of 23 .....           | 65 |
| <sup>13</sup> C NMR Spectrum of 23 .....          | 65 |
| <sup>1</sup> H NMR Spectrum of 24 .....           | 66 |
| <sup>13</sup> C NMR Spectrum of 24 .....          | 66 |
| 7. X-ray Crystal Structure Data .....             | 67 |
| X-ray Crystal Structure Data for compound 2.....  | 67 |
| X-ray Crystal Structure Data for compound 23..... | 68 |



## 1. General Information

All reactions were performed under a designated atmosphere in flame-dried round bottom flasks, magnetically stirred, unless otherwise noted. All reactions were performed at room temperature (rt., approximately 25 °C) unless otherwise noted. Preparative column chromatography was performed using silica gel 60, particle size 0.063–0.200 mm (70–230 mesh, flash). Analytical TLC was carried out employing silica gel 60 F254 plates (Merck, Darmstadt). Visualization of the developed chromatograms was performed with detection by UV (254 nm and 365 nm). Preparative thin layer chromatography (PTLC) separations were carried out on 0.20 mm Yantai Jiangyou silica gel plates (HSGF254). <sup>1</sup>H and <sup>13</sup>C nuclear magnetic resonance (NMR) spectrum were recorded on a Bruker-400 (<sup>1</sup>H, 400 MHz; <sup>13</sup>C, 101 MHz; <sup>19</sup>F 376 MHz) and JEOL-500 (<sup>1</sup>H, 500 MHz; <sup>13</sup>C, 126 MHz; <sup>19</sup>F 471 MHz) spectrometer. Chemical shifts for protons are reported in parts per million and are references to the NMR solvent peak (CDCl<sub>3</sub>: δ 7.26; DMSO-*d*<sub>6</sub>: 2.50). Chemical shifts for carbons are reported in parts per million and are referenced to the carbon resonances of the NMR solvent (CDCl<sub>3</sub>: δ 77.16; DMSO-*d*<sub>6</sub>: 39.52). Signals are listed in ppm, and multiplicity identified as s = singlet, d = doublet, t = triplet, q = quartet, m = multiplet. Chemical shifts were expressed in ppm, and *J* values were given in Hz. High resolution mass Spectrum (HRMS) were obtained from Thermo Fishec r Scientific Exactive Plus mass spectrometer. The melting point was determined using the X-4A melting point apparatus (Shanghai Yidian Co., Ltd.) and uncorrected. Concentration under reduced pressure was performed by rotary evaporation at 25–35 °C at appropriate pressure. Purified compounds were further dried under high vacuum (0.01-0.10 Torr). Yields refer to purified and spectroscopically pure compounds unless otherwise noted. All commercially available starting materials and solvents were reagent grade and used without further purification.

Abbreviations used:

TLC = thin layer chromatography

*t*-BuOCl = *tert*-butyl hypochlorite

PE = petroleum ether

EtOAc = ethyl acetate

DMSO = dimethyl sulfoxide

TMEDA = *N, N, N', N'*-tetramethylethylenediamine

## 2. Optimization of Reaction Conditions

Table S1. Optimization of substrate expansion

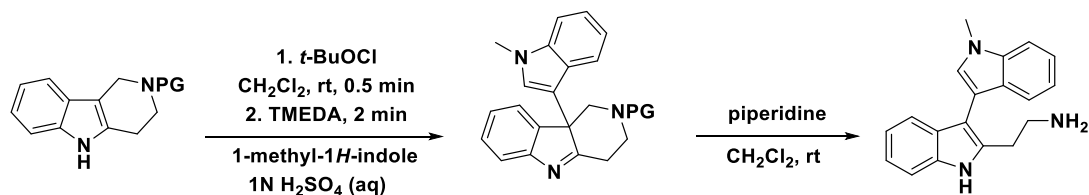

| Entry <sup>[a]</sup> | <i>N</i> -PG                 | Yield <sup>[b]</sup> |
|----------------------|------------------------------|----------------------|
| 1                    | <i>N</i> -Ts                 | trace                |
| 2                    | <i>N</i> -Ac                 | trace                |
| 3                    | <i>N</i> -SO <sub>2</sub> Ph | trace                |
| 4                    | <i>N</i> -CO <sub>2</sub> Me | trace                |
| 5                    | <b><i>N</i>-Fmoc</b>         | <b>81</b>            |

[a] Unless otherwise noted, all reactions were carried out with *N*-PG-THyCs (0.1 mmol, 1.0 equiv) and *tert*-butyl hypochlorite (0.11 mmol, 1.1 equiv) in 1.0 mL CH<sub>2</sub>Cl<sub>2</sub> at rt for 0.5 min, then TMEDA (0.1 mmol, 2.0 equiv) was added and the reaction mixture was stirred at rt for 2 min. 1-methyl-1*H*-indole (0.15 mmol, 1.5 equiv) and 1 N H<sub>2</sub>SO<sub>4</sub> solution (0.1 mL, 0.1 mmol) were added and the reaction mixture was stirred at rt for another 30 min. The resulting mixture was washed with H<sub>2</sub>O (2 mL). The organic layer was dried over anhydrous Na<sub>2</sub>SO<sub>4</sub>, filtered, and then concentrated to dryness under vacuum to give the crude product. To a solution of this crude product in different solvent (0.8 mL) was added piperidine (0.2 mL). The mixture was stirred at rt for 20 min. [b] The yield was determined by silica gel column chromatography.

**Table S2. Optimization of solvents**

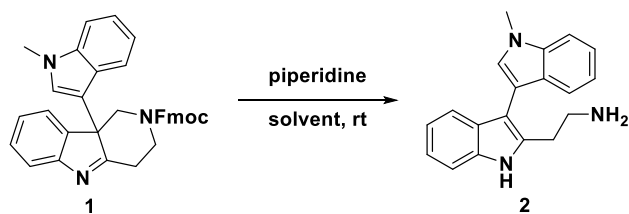

| Entry <sup>[a]</sup> | solvent                             | Yield <sup>[b]</sup> | Entry <sup>[a]</sup> | solvent       | Yield <sup>[b]</sup> |
|----------------------|-------------------------------------|----------------------|----------------------|---------------|----------------------|
| <b>1</b>             | <b>CH<sub>2</sub>Cl<sub>2</sub></b> | <b>81%</b>           | 8                    | DMSO          | 50%                  |
| 2                    | CHCl <sub>3</sub>                   | 50%                  | 9                    | Acetone       | 25%                  |
| 3                    | CCl <sub>4</sub>                    | 30%                  | 10                   | DMA           | 45%                  |
| 4                    | THF                                 | 30%                  | 11                   | 1,4-Dioxane   | 50%                  |
| 5                    | CH <sub>3</sub> CN                  | 30%                  | 12                   | 2-MeTHF       | 35%                  |
| 6                    | DCE                                 | 30%                  | 13                   | Ethyl acetate | 35%                  |
| 7                    | DMF                                 | 50%                  | 14                   | MeOH          | 40%                  |

[a] To a solution of **1** (0.1 mmol) in the solvent (0.8 mL) was added piperidine (0.2 mL). The mixture was stirred at rt for 20 min. [b] Isolated yield.

**Table S3. Optimization of bases**

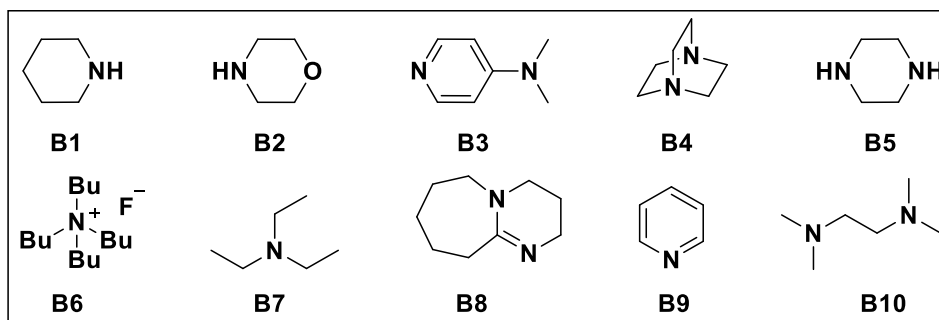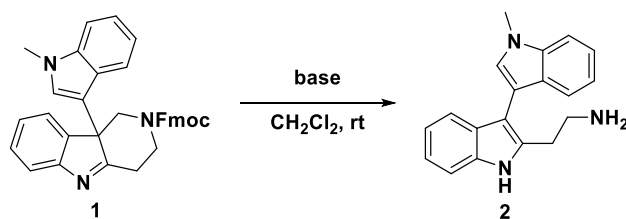

| Entry <sup>[a]</sup> | Base (equiv) | Stirring time (h) | Yield (%) <sup>[b]</sup> | Entry <sup>[a]</sup> | Base (equiv) | Stirring time (h) | Yield (%) <sup>[b]</sup> |
|----------------------|--------------|-------------------|--------------------------|----------------------|--------------|-------------------|--------------------------|
| 1                    | B1 (20 eq)   | 0.5 h             | 81%                      | 11                   | B6 (2 eq)    | 8 h               | trace                    |
| 2                    | B1 (13 eq)   | 3 h               | 70%                      | 12                   | B7 (2 eq)    | 8 h               | trace                    |
| 3                    | B1 (2 eq)    | 8 h               | 40%                      | 13                   | B8 (2 eq)    | 3 h               | trace                    |
| 4                    | B1 (1 eq)    | 8 h               | 20%                      | 14                   | B9 (2 eq)    | 8 h               | trace                    |
| 5                    | B2 (20 eq)   | 0.5 h             | trace                    | 15                   | B10 (2 eq)   | 8 h               | trace                    |
| 6                    | B3 (2 eq)    | 8 h               | trace                    | 16                   | B5 (4 eq)    | 12 h              | 88%                      |
| 7                    | B4 (2 eq)    | 8 h               | trace                    | 17                   | B5 (5 eq)    | 12 h              | 75%                      |
| 8                    | B5 (2 eq)    | 8 h               | 60%                      | 18                   | B5 (6 eq)    | 12 h              | 75%                      |
| 9                    | B5 (10 eq)   | 2 h               | 75%                      | 19                   | B5 (8 eq)    | 12 h              | 75%                      |
| 10                   | B6 (1 eq)    | 8 h               | trace                    | -                    | -            | -                 | -                        |

[a] To a solution of **1** in CH<sub>2</sub>Cl<sub>2</sub> (0.8 mL) was added different base and the mixture was stirred at rt.

[b] Isolated yield.

### 3. Emission Spectra Data

#### Emission Spectrum Data for compound 3

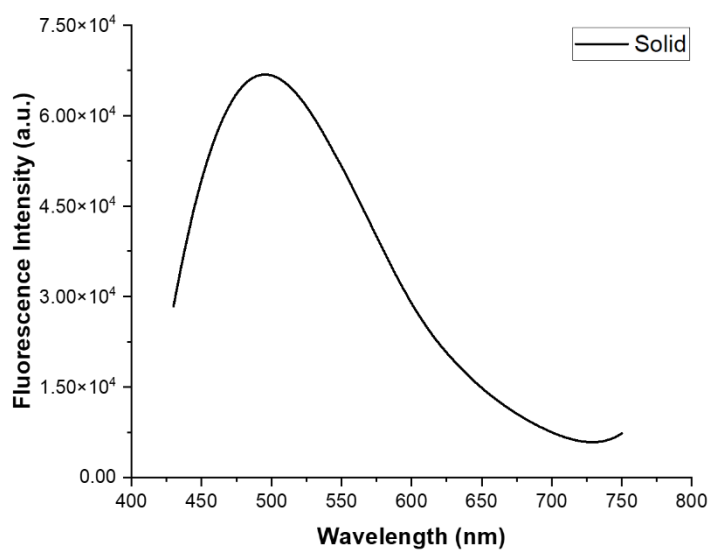

**Figure S1.** Emission spectrum of compound **3** in solid state was excited by 365 nm.

#### Emission Spectrum Data for compound 4

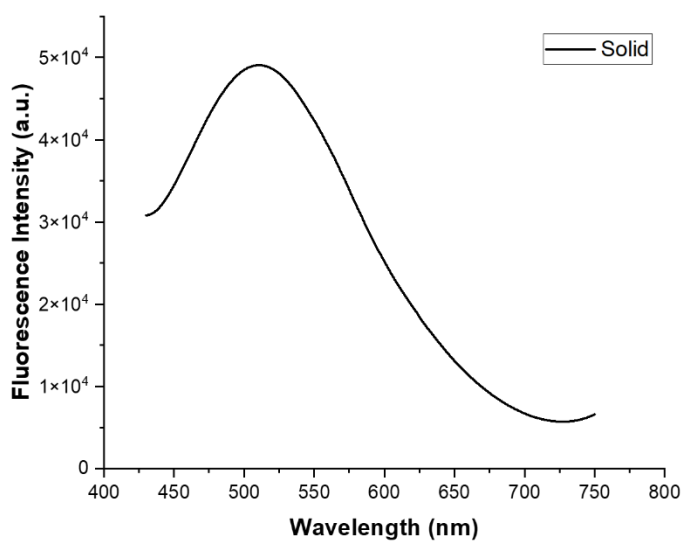

**Figure S2.** Emission spectrum of compound **4** in solid state was excited by 365 nm.

### Emission Spectrum Data for compound 5

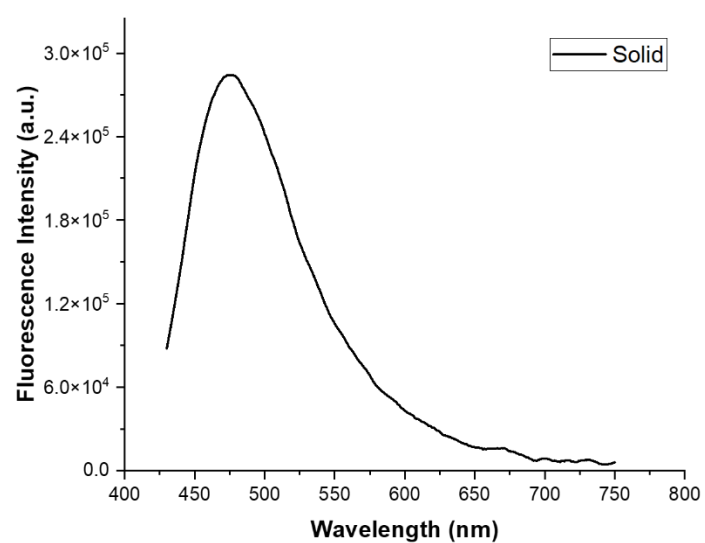

**Figure S3.** Emission spectrum of compound **5** in solid state was excited by 365 nm.

### Emission Spectrum Data for compound 7

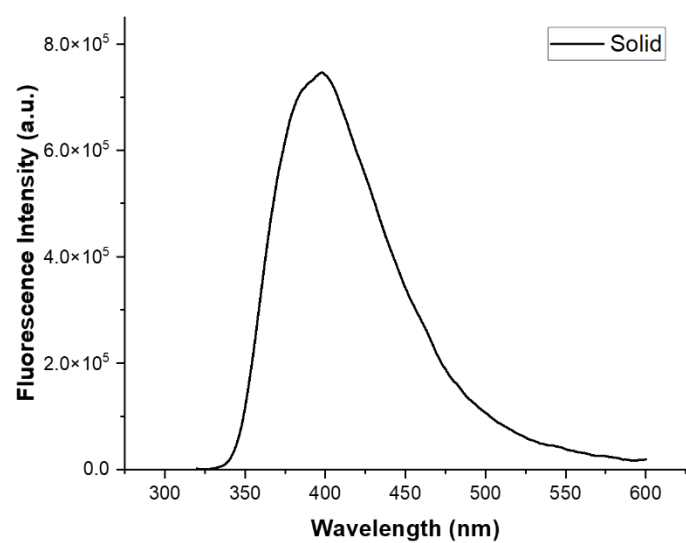

**Figure S4.** Emission spectrum of compound **7** in solid state was excited by 365 nm.

### Emission Spectrum Data for compound 12

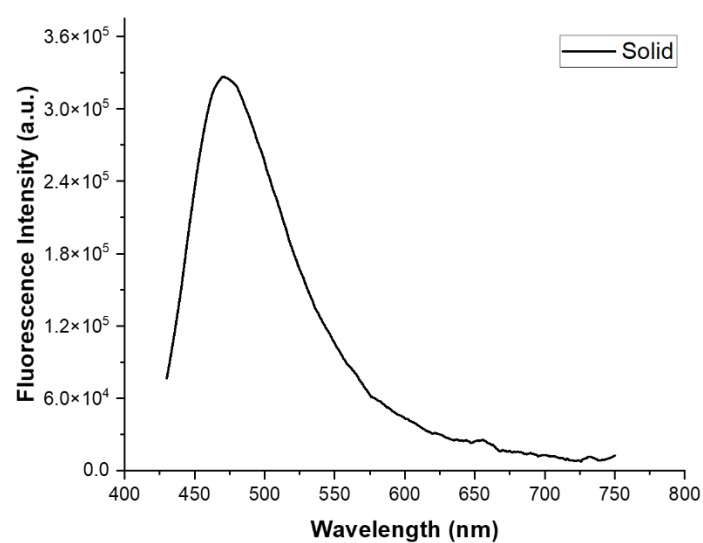

**Figure S5.** Emission spectrum of compound **12** in solid state was excited by 365 nm.

### Emission Spectrum Data for compound 20 (Solid)

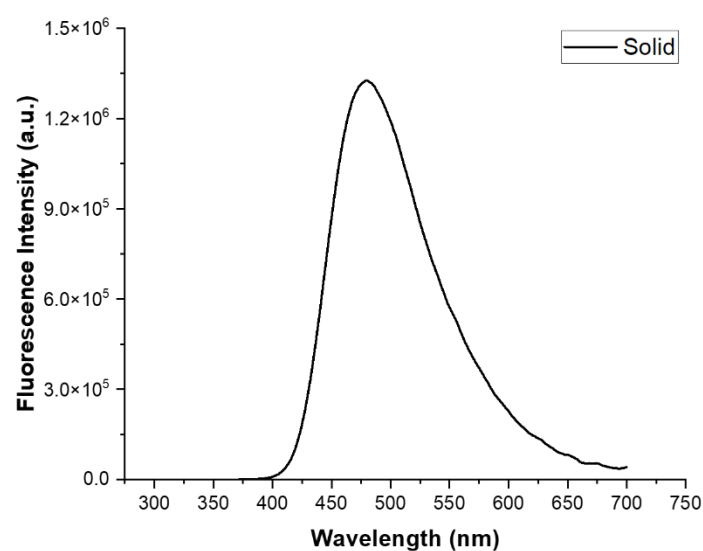

**Figure S6.** Emission spectrum of compound **20** in solid state was excited by 365 nm.

### Emission Spectrum Data for compound 20 in THF

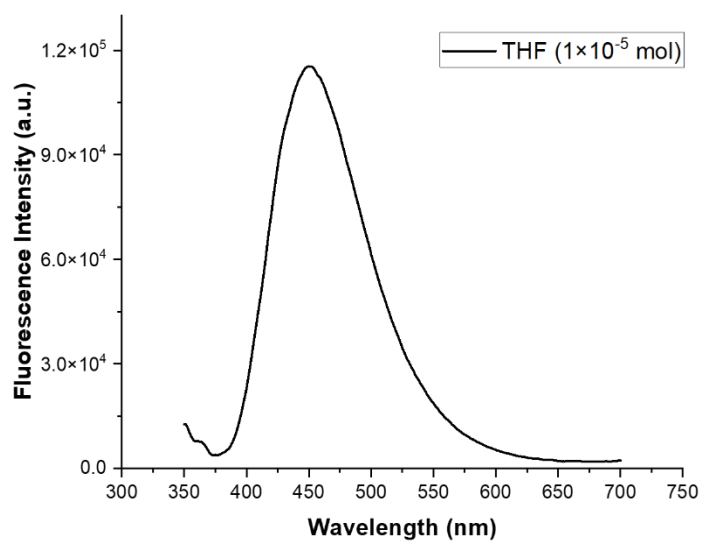

**Figure S7.** Emission spectrum of compound **20** in THF ( $1 \times 10^{-5}$  mol/L) was excited by 365 nm.

### Emission Spectrum Data for compound 21

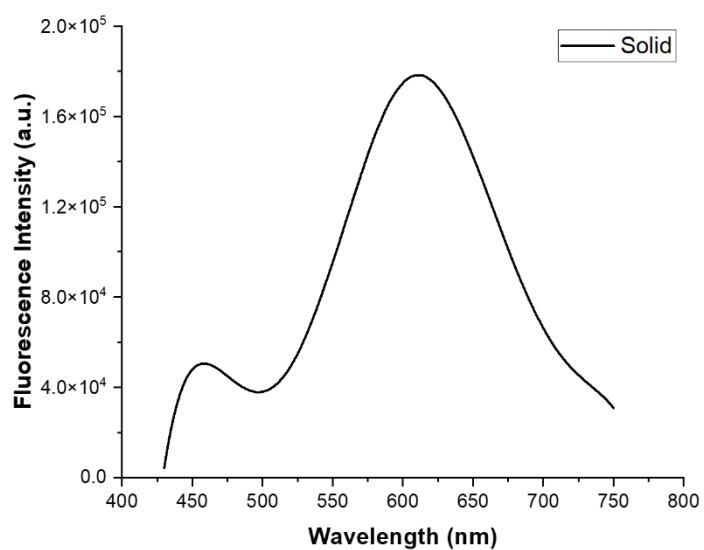

**Figure S8.** Emission spectrum of compound **21** in solid state was excited by 365 nm.



### Emission Spectrum Data for compound **24** (Solid)

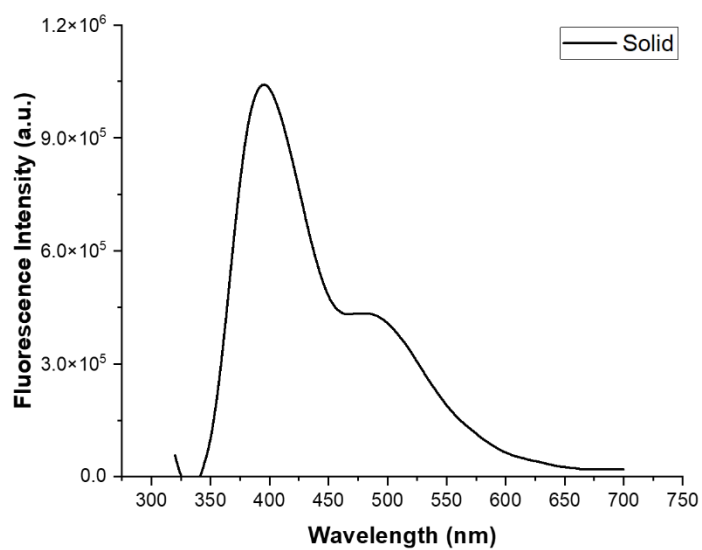

**Figure S9.** Emission spectrum of compound **24** in solid state was excited by 365 nm.

### Emission Spectrum Data for compound **24** in THF

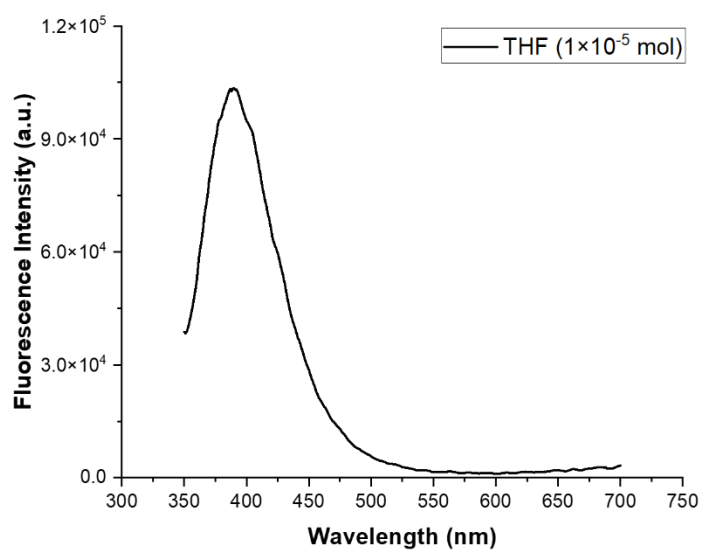

**Figure S10.** Emission spectrum of compound **24** in THF ( $1 \times 10^{-5}$  mol/L) was excited by 365 nm.

### Normalized Emission Spectra Data for compounds 20 and 24

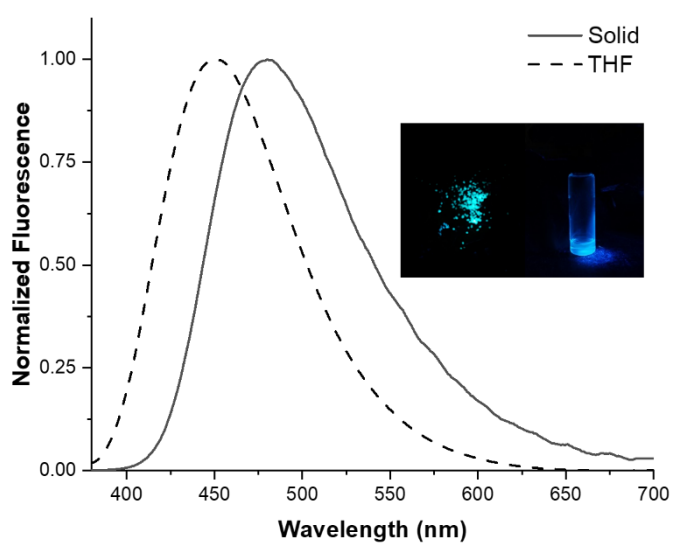

**Figure S11.** Normalized PL emission spectrum of compounds **20** in THF ( $1 \times 10^{-5}$  mol/L) and in solid state was excited by 365 nm.

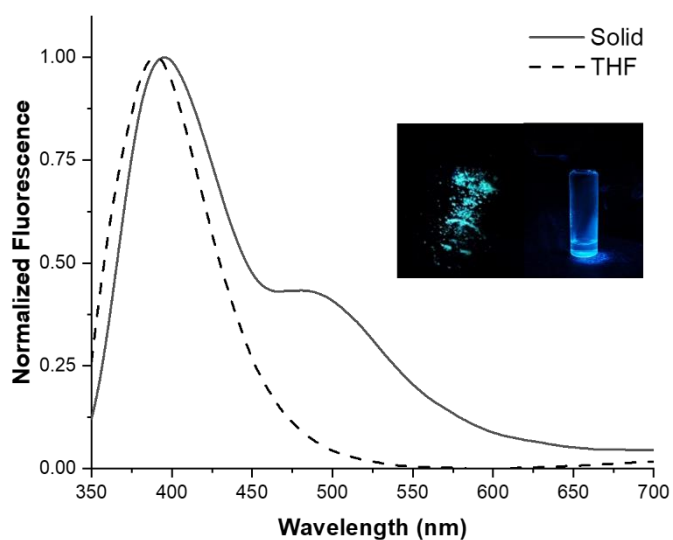

**Figure S12.** Normalized PL emission spectrum of compounds **24** in THF ( $1 \times 10^{-5}$  mol) and in solid state was excited by 365 nm.

## 4. Mechanism Studies

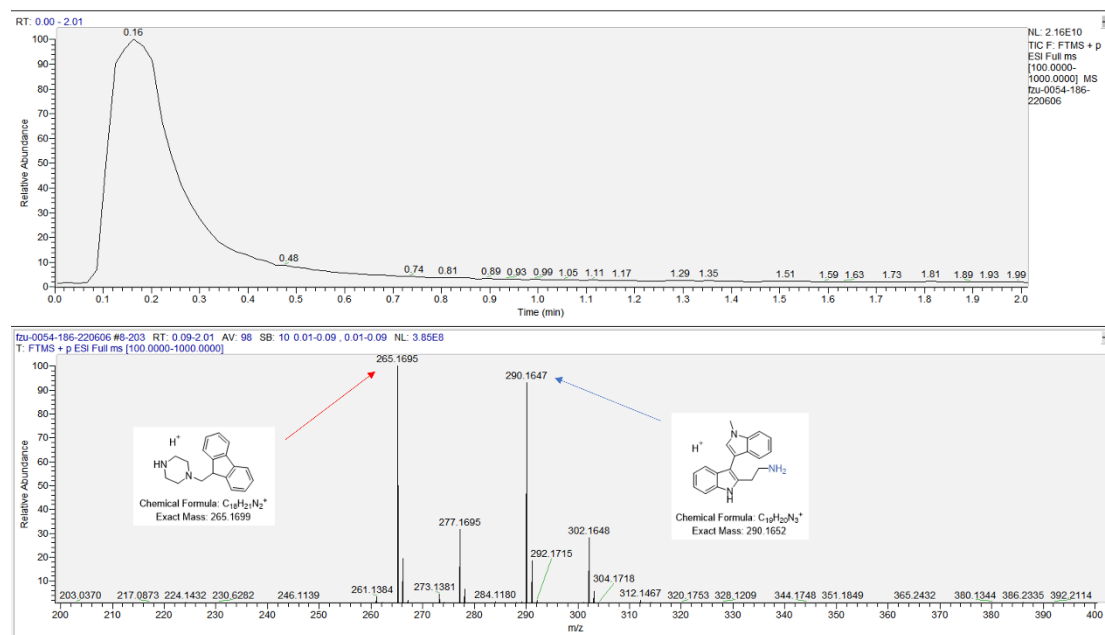

**Figure S13. HRMS of DBF adduct.**

HRMS (ESI): calcd for  $C_{18}H_{21}N_2$  [M + H]<sup>+</sup>m/z 265.1699, found 265.1695.

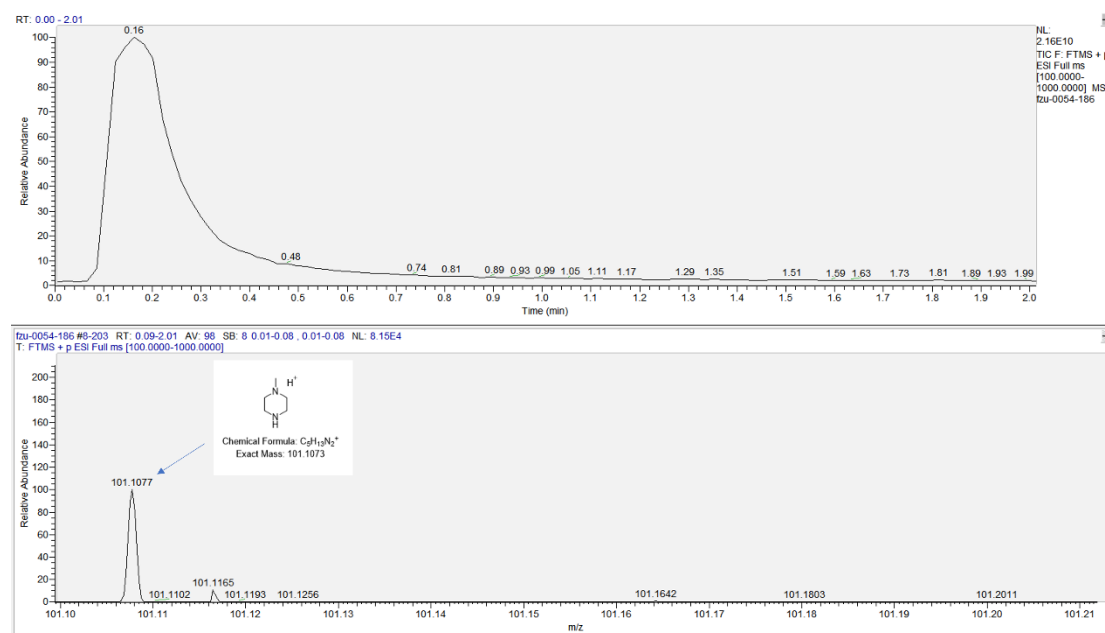

**Figure S14. HRMS of 1-methylpiperazine.**

HRMS (ESI): calcd for  $C_5H_{13}N_2$  [M + H]<sup>+</sup>m/z 101.1073, found 101.1077.

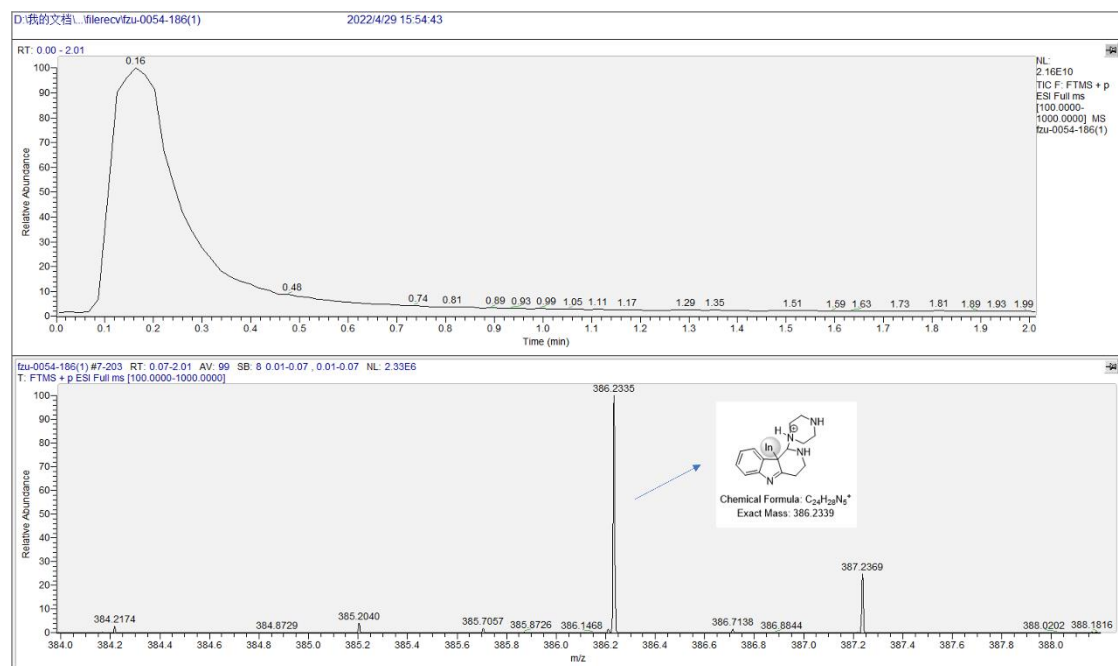

**Figure S15. HRMS of B.**

HRMS (ESI): calcd for  $C_{24}H_{28}N_5 [M + H]^+ m/z$  386.2339, found 386.2335.

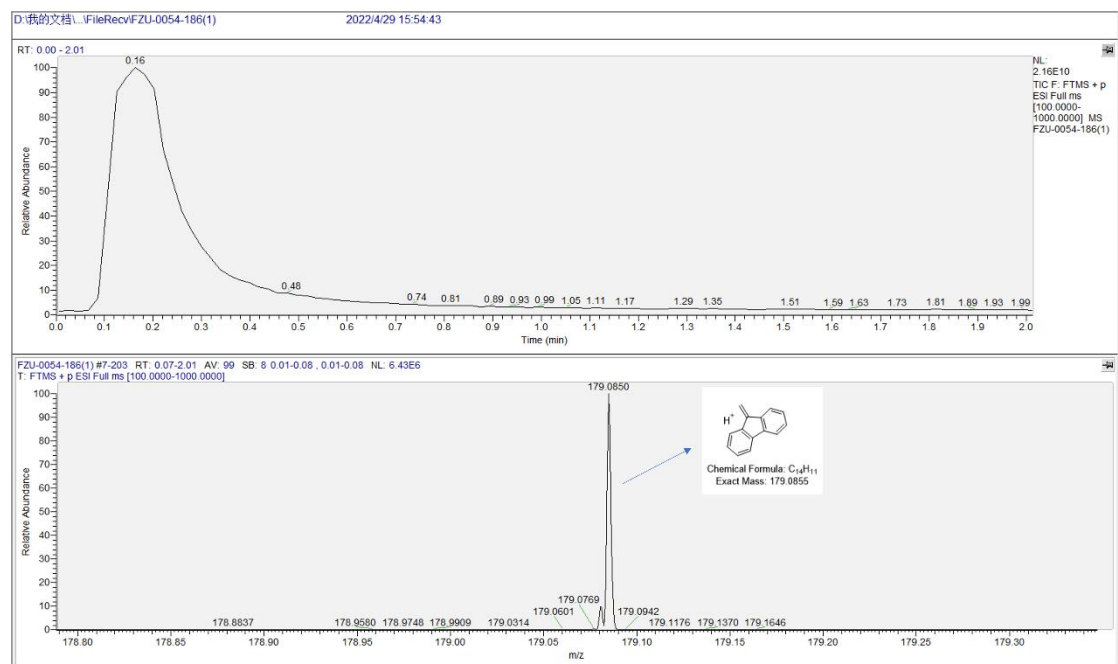

**Figure S16. HRMS of C.**

HRMS (ESI): calcd for  $C_{14}H_{11} [M + H]^+ m/z$  179.0855, found 179.0850.

## 5. General Procedures

### Compound 2

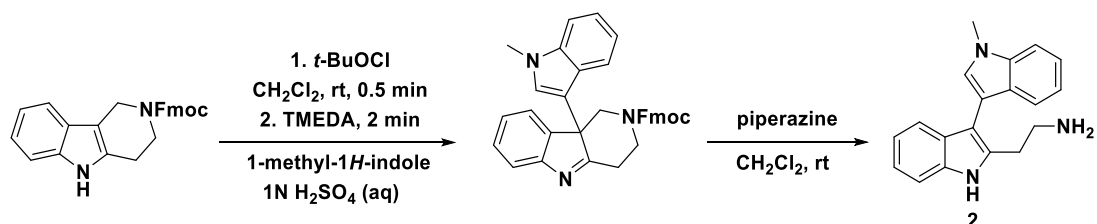

#### **2-(1'-Methyl-1*H*,1'*H*-[3,3'-biindol]-2-yl)ethan-1-amine**

To a solution of (9*H*-fluoren-9-yl)methyl 1,3,4,5-tetrahydro-2*H*-pyrido[4,3-*b*]indole-2-carboxylate (394 mg, 1.0 mmol) in CH<sub>2</sub>Cl<sub>2</sub> (8 mL) was added *tert*-butyl hypochlorite (130 mg, 1.2 mmol). The solution was stirred at rt for 0.5 min and then TMEDA (116 mg, 1.0 mmol) was added. The solution was stirred at rt for 2 min. Then 1-methyl-1*H*-indole (196 mg, 1.5 mmol) and 1 N H<sub>2</sub>SO<sub>4</sub> solution (1.0 mL, 1.0 mmol) were added into the mixture. The solution was stirred at rt for 30 min. The resulting mixture was diluted with CH<sub>2</sub>Cl<sub>2</sub> (40 mL) and then was washed with H<sub>2</sub>O (60 mL). The organic layer was dried over anhydrous Na<sub>2</sub>SO<sub>4</sub>, filtered, and then concentrated to dryness under vacuum to give the crude product. To a solution of this crude product in CH<sub>2</sub>Cl<sub>2</sub> (4 mL) was added piperazine (331 mg). The mixture was stirred at rt for 20 min. The resulting solution was diluted with CH<sub>2</sub>Cl<sub>2</sub> (40 mL) and then was washed with saturated aqueous NaHCO<sub>3</sub> solution (100 mL). The organic layer was dried over anhydrous Na<sub>2</sub>SO<sub>4</sub>, filtered, and then concentrated to dryness under vacuum. The residue was purified by silica gel column chromatography (CH<sub>2</sub>Cl<sub>2</sub>/MeOH/NH<sub>3</sub>•H<sub>2</sub>O = 100:10:1) the desired product (234 mg, 85%) as a white solid.

**Physical State:** white solid

**Melting Point:** 160.2 – 163.5 °C.

**TLC:** R<sub>f</sub> = 0.33 (CH<sub>2</sub>Cl<sub>2</sub>/MeOH = 10:1).

**<sup>1</sup>H NMR (400 MHz, CDCl<sub>3</sub>)** δ 9.68 (s, 1H), 7.52 (d, *J* = 7.9 Hz, 1H), 7.48 (d, *J* = 8.0 Hz, 1H), 7.39 (d, *J* = 8.3 Hz, 1H), 7.36 (d, *J* = 8.6 Hz, 1H), 7.25 (d, *J* = 8.0 Hz, 1H), 7.19 – 7.11 (m, 1H), 7.11 – 7.03 (m, 2H), 7.00 (s, 1H), 3.77 (s, 3H), 3.69 (s, 2H), 2.91 (s, 4H).

**<sup>13</sup>C NMR (101 MHz, CDCl<sub>3</sub>)** δ 137.03, 135.59, 133.55, 128.72, 128.10, 127.63, 121.69, 121.47, 120.54, 119.67, 119.37, 119.10, 110.89, 109.38, 108.34, 107.29, 40.96, 32.75, 27.82.

**HRMS (ESI):** calcd for C<sub>19</sub>H<sub>20</sub>N<sub>3</sub> [M + H]<sup>+</sup> *m/z* 290.1652, found 290.1649.

### Compound 3

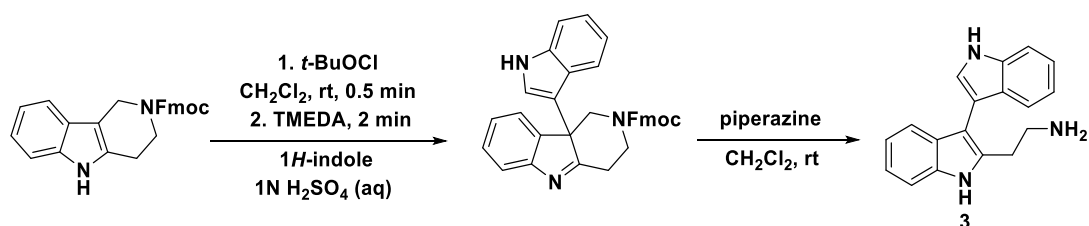

#### 2-(1*H*,1'*H*-[3,3'-Biindol]-2-yl)ethan-1-amine

To a solution of (9*H*-fluoren-9-yl)methyl 1,3,4,5-tetrahydro-2*H*-pyrido[4,3-*b*]indole-2-carboxylate (394 mg, 1.0 mmol) in CH<sub>2</sub>Cl<sub>2</sub> (8 mL) was added *tert*-butyl hypochlorite (130 mg, 1.2 mmol). The solution was stirred at rt for 0.5 min and then TMEDA (116 mg, 1.0 mmol) was added. The solution was stirred at rt for 2 min. Then 1*H*-indole (129 mg, 1.1 mmol) and 1 N H<sub>2</sub>SO<sub>4</sub> solution (1.0 mL, 1.0 mmol) were added into the mixture. The solution was stirred at rt for 30 min. The resulting mixture was diluted with CH<sub>2</sub>Cl<sub>2</sub> (40 mL) and then was washed with H<sub>2</sub>O (60 mL). The organic layer was dried over anhydrous Na<sub>2</sub>SO<sub>4</sub>, filtered, and then concentrated to dryness under vacuum to give the crude product. To a solution of this crude product in CH<sub>2</sub>Cl<sub>2</sub> (4 mL) was added piperazine (331 mg). The mixture was stirred at rt for 30 min. The resulting solution was diluted with CH<sub>2</sub>Cl<sub>2</sub> (40 mL) and then was washed with saturated aqueous NaHCO<sub>3</sub> solution (100 mL). The organic layer was dried over anhydrous Na<sub>2</sub>SO<sub>4</sub>, filtered, and then concentrated to dryness under vacuum. The residue was purified by silica gel column chromatography (CH<sub>2</sub>Cl<sub>2</sub>/MeOH/NH<sub>3</sub>•H<sub>2</sub>O = 100:10:1) to give the desired product (146 mg, 53%) as a yellow solid.

**Physical State:** yellow solid.

**Melting Point:** 85.1 – 88.3 °C.

**TLC:** R<sub>f</sub> = 0.35 (CH<sub>2</sub>Cl<sub>2</sub>/MeOH = 5:1).

**<sup>1</sup>H NMR (400 MHz, CDCl<sub>3</sub>)** δ 9.64 (s, 1H), 8.36 (s, 1H), 7.45 (d, *J* = 43.2 Hz, 2H), 7.35 (d, *J* = 33.4 Hz, 2H), 7.27 – 7.20 (m, 2H), 7.20 – 7.14 (m, 2H), 7.14 – 6.96 (m, 3H), 3.35 (s, 2H), 2.90 (s, 4H).

**<sup>13</sup>C NMR (101 MHz, DMSO-*d*<sub>6</sub>)** δ 136.85, 136.10, 135.26, 128.80, 127.80, 124.08, 121.39, 120.77, 120.12, 119.23, 118.95, 118.83, 112.10, 111.23, 109.23, 106.74, 42.29, 30.85.

**<sup>13</sup>C NMR (101 MHz, DMSO-*d*<sub>6</sub>)** δ 124.08, 121.39, 120.78, 120.13, 119.24, 118.95, 118.84, 112.10, 111.23, 42.29, 30.85.

**HRMS (ESI):** calcd for C<sub>18</sub>H<sub>18</sub>N<sub>3</sub> [M + H]<sup>+</sup>*m/z* 276.1495, found 276.1486.

## Compound 4

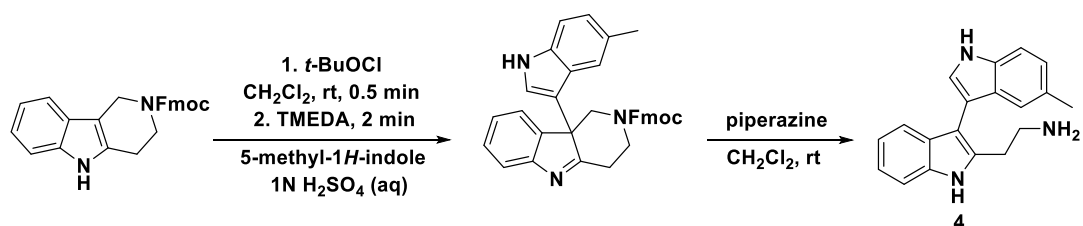

### 2-(5'-Methyl-1*H*,1'*H*-[3,3'-biindol]-2-yl)ethan-1-amine

To a solution of (9*H*-fluoren-9-yl)methyl 1,3,4,5-tetrahydro-2*H*-pyrido[4,3-*b*]indole-2-carboxylate (394 mg, 1.0 mmol) in CH<sub>2</sub>Cl<sub>2</sub> (8 mL) was added *tert*-butyl hypochlorite (130 mg, 1.2 mmol). The solution was stirred at rt for 0.5 min and then TMEDA (116 mg, 1.0 mmol) was added. The solution was stirred at rt for 2 min. Then 5-methyl-1*H*-indole (144 mg, 1.1 mmol) and 1 N H<sub>2</sub>SO<sub>4</sub> solution (1.0 mL, 1.0 mmol) were added into the mixture. The solution was stirred at rt for 6 h. The resulting mixture was diluted with CH<sub>2</sub>Cl<sub>2</sub> (40 mL) and then was washed with H<sub>2</sub>O (60 mL). The organic layer was dried over anhydrous Na<sub>2</sub>SO<sub>4</sub>, filtered, and then concentrated to dryness under vacuum to give the crude product. To a solution of this crude product in CH<sub>2</sub>Cl<sub>2</sub> (5 mL) was added piperazine (331 mg). The mixture was stirred at rt for 20 min. The resulting solution was diluted with CH<sub>2</sub>Cl<sub>2</sub> (40 mL) and then was washed with saturated aqueous NaHCO<sub>3</sub> solution (100 mL). The organic layer was dried over anhydrous Na<sub>2</sub>SO<sub>4</sub>, filtered, and then concentrated to dryness under vacuum. The residue was purified by silica gel column chromatography (CH<sub>2</sub>Cl<sub>2</sub>/MeOH/NH<sub>3</sub>•H<sub>2</sub>O = 100:10:1) to give the desired product (150 mg, 52%) as a light yellow solid.

**Physical State:** light yellow solid.

**Melting Point:** 90.5 – 93.5 °C.

**TLC:** R<sub>f</sub> = 0.39 (CH<sub>2</sub>Cl<sub>2</sub>/MeOH = 30:1).

**<sup>1</sup>H NMR (400 MHz, CDCl<sub>3</sub>)** δ 9.61 (s, 1H), 8.20 (s, 1H), 7.54 (d, *J* = 7.8 Hz, 1H), 7.42 (d, *J* = 8.0 Hz, 1H), 7.38 – 7.32 (m, 2H), 7.23 – 7.17 (m, 2H), 7.10 (d, *J* = 6.6 Hz, 2H), 3.08 – 3.01 (m, 2H), 2.99 – 2.91 (m, 2H), 2.43 (s, 3H), 2.04 (s, 2H).

**<sup>13</sup>C NMR (101 MHz, CDCl<sub>3</sub>)** δ 135.48, 135.41, 134.62, 128.85, 128.78, 128.14, 123.67, 123.19, 121.25, 120.09, 119.63, 119.30, 110.89, 110.67, 109.75, 107.00, 41.74, 29.06, 21.55.

**<sup>13</sup>C NMR (101 MHz, CDCl<sub>3</sub>)** δ 123.67, 123.19, 121.25, 120.10, 119.63, 119.30, 110.89, 110.67, 41.74, 29.06, 21.54.

**HRMS (ESI):** calcd for C<sub>19</sub>H<sub>20</sub>N<sub>3</sub> [M + H]<sup>+</sup>*m/z* 290.1652, found 290.1641.

## Compound 5

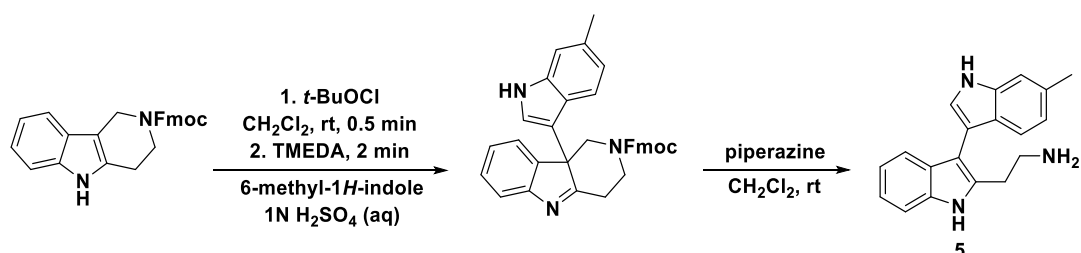

### 2-(6'-Methyl-1*H*,1'*H*-[3,3'-biindol]-2-yl)ethan-1-amine

To a solution of (9*H*-fluoren-9-yl)methyl 1,3,4,5-tetrahydro-2*H*-pyrido[4,3-*b*]indole-2-carboxylate (394 mg, 1.0 mmol) in CH<sub>2</sub>Cl<sub>2</sub> (8 mL) was added *tert*-butyl hypochlorite (130 mg, 1.2 mmol). The solution was stirred at rt for 0.5 min and then TMEDA (116 mg, 1.0 mmol) was added. The solution was stirred at rt for 2 min. Then 6-methyl-1*H*-indole (144 mg, 1.1 mmol) and 1 N H<sub>2</sub>SO<sub>4</sub> solution (1.0 mL, 1.0 mmol) were added into the mixture. The solution was stirred at rt for 30 min. The resulting mixture was diluted with CH<sub>2</sub>Cl<sub>2</sub> (40 mL) and then was washed with H<sub>2</sub>O (60 mL). The organic layer was dried over anhydrous Na<sub>2</sub>SO<sub>4</sub>, filtered, and then concentrated to dryness under vacuum to give the crude product. To a solution of this crude product in CH<sub>2</sub>Cl<sub>2</sub> (5 mL) was added piperazine (331 mg). The mixture was stirred at rt for 12 h. The resulting solution was diluted with CH<sub>2</sub>Cl<sub>2</sub> (40 mL) and then was washed with saturated aqueous NaHCO<sub>3</sub> solution (100 mL). The organic layer was dried over anhydrous Na<sub>2</sub>SO<sub>4</sub>, filtered, and then concentrated to dryness under vacuum. The residue was purified by silica gel column chromatography (CH<sub>2</sub>Cl<sub>2</sub>/MeOH/NH<sub>3</sub>•H<sub>2</sub>O = 100:10:1) to give the desired product (150 mg, 52%) as a yellow solid.

**Physical State:** yellow solid.

**Melting Point:** 93.3 – 95.2 °C.

**TLC:** R<sub>f</sub> = 0.36 (CH<sub>2</sub>Cl<sub>2</sub>/MeOH = 5:1).

**<sup>1</sup>H NMR (400 MHz, CDCl<sub>3</sub>)** δ 9.54 (s, 1H), 8.18 (s, 1H), 7.53 (d, *J* = 7.8 Hz, 1H), 7.42 (d, *J* = 8.0 Hz, 1H), 7.39 (d, *J* = 8.3 Hz, 1H), 7.19 (d, *J* = 7.2 Hz, 2H), 7.10 – 7.03 (m, 2H), 6.96 (d, *J* = 8.0 Hz, 1H), 2.96 – 2.85 (m, 4H), 2.51 (s, 3H), 2.48 (s, 2H).

**<sup>13</sup>C NMR (101 MHz, CDCl<sub>3</sub>)** δ 136.70, 135.48, 134.95, 131.87, 128.72, 125.67, 122.31, 121.31(2C), 120.20, 119.64, 119.30, 111.21, 110.72, 109.98, 107.09, 41.53, 28.75, 21.71.

**HRMS (ESI):** calcd for C<sub>19</sub>H<sub>20</sub>N<sub>3</sub> [M + H]<sup>+</sup> *m/z* 290.1652, found 290.1641.



## Compound 6

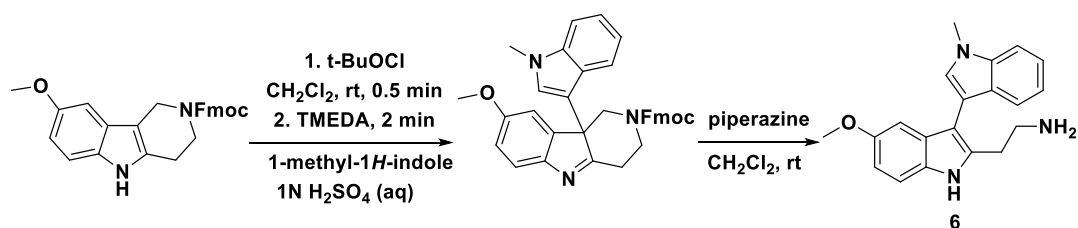

### 2-(5-methoxy-1'-methyl-1*H*,1'*H*-[3,3'-biindol]-2-yl)ethan-1-amine

To a solution of (9*H*-fluoren-9-yl)methyl 8-methoxy-1,3,4,5-tetrahydro-2*H*-pyrido[4,3-*b*]indole-2-carboxylate (424 mg, 1.0 mmol) in CH<sub>2</sub>Cl<sub>2</sub> (8 mL) was added *tert*-butyl hypochlorite (130 mg, 1.2 mmol). The solution was stirred at rt for 0.5 min and then TMEDA (116 mg, 1.0 mmol) was added. The solution was stirred at rt for 2 min. Then 1-methyl-1*H*-indole (196 mg, 1.5 mmol) and 1 N H<sub>2</sub>SO<sub>4</sub> solution (1.0 mL, 1.0 mmol) were added into the mixture. The solution was stirred at rt for 30 min. The resulting mixture was diluted with CH<sub>2</sub>Cl<sub>2</sub> (40 mL) and then was washed with H<sub>2</sub>O (60 mL). The organic layer was dried over anhydrous Na<sub>2</sub>SO<sub>4</sub>, filtered, and then concentrated to dryness under vacuum to give the crude product. To a solution of this crude product in CH<sub>2</sub>Cl<sub>2</sub> (4 mL) was added piperazine (331 mg). The mixture was stirred at rt for 20 min. The resulting solution was diluted with CH<sub>2</sub>Cl<sub>2</sub> (40 mL) and then was washed with saturated aqueous NaHCO<sub>3</sub> solution (100 mL). The organic layer was dried over anhydrous Na<sub>2</sub>SO<sub>4</sub>, filtered, and then concentrated to dryness under vacuum. The residue was purified by silica gel column chromatography (CH<sub>2</sub>Cl<sub>2</sub>/MeOH/NH<sub>3</sub>•H<sub>2</sub>O = 80:10:1) the desired product (220 mg, 69%) as a gray solid.

**Physical State:** gray solid

**Melting Point:** 142.3 – 145.1 °C.

**TLC:** R<sub>f</sub> = 0.38 (CH<sub>2</sub>Cl<sub>2</sub>/MeOH = 10:1).

**<sup>1</sup>H NMR (500 MHz, CDCl<sub>3</sub>)** δ 9.55 (s, 1H), 7.51 (d, *J* = 8.0 Hz, 1H), 7.39 (d, *J* = 8.3 Hz, 1H), 7.29 – 7.26 (m, 2H), 7.11 – 7.07 (m, 2H), 6.97 (d, *J* = 2.4 Hz, 1H), 6.82 (dd, *J* = 8.7, 2.5 Hz, 1H), 3.87 (s, 3H), 3.74 (s, 3H), 2.99 (t, *J* = 5.9 Hz, 2H), 2.91 (t, *J* = 6.0 Hz, 2H).

**<sup>13</sup>C NMR (126 MHz, CDCl<sub>3</sub>)** δ 154.11, 137.15, 136.25, 130.68, 129.29, 128.30, 127.60, 121.73, 120.78, 119.12, 111.47, 111.40, 109.42, 108.92, 106.83, 101.62, 56.06, 41.79, 32.95, 29.17.

**HRMS (ESI):** calcd for C<sub>19</sub>H<sub>20</sub>N<sub>3</sub> [M + H]<sup>+</sup>*m/z* 320.1757, found 320.1756.

## Compound 7

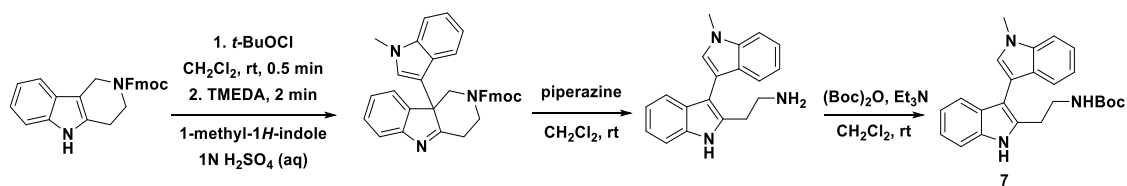

### *tert-Butyl (2-(1'-methyl-1H,1'H-[3,3'-biindol]-2-yl)ethyl)carbamate*

To a solution of *(9H-fluoren-9-yl)methyl 1,3,4,5-tetrahydro-2H-pyrido[4,3-b]indole-2-carboxylate* (394 mg, 1.0 mmol) in  $\text{CH}_2\text{Cl}_2$  (8 mL) was added *tert*-butyl hypochlorite (130 mg, 1.2 mmol). The solution was stirred at rt for 0.5 min and then TMEDA (116 mg, 1.0 mmol) was added. The solution was stirred at rt for 2 min. Then *1-methyl-1H-indole* (196 mg, 1.5 mmol) and 1 N  $\text{H}_2\text{SO}_4$  solution (1.0 mL, 1.0 mmol) were added into the mixture. The solution was stirred at rt for 30 min. The resulting mixture was diluted with  $\text{CH}_2\text{Cl}_2$  (40 mL) and then was washed with  $\text{H}_2\text{O}$  (60 mL). The organic layer was dried over anhydrous  $\text{Na}_2\text{SO}_4$ , filtered, and then concentrated to dryness under vacuum to give the crude product. To a solution of this crude product in  $\text{CH}_2\text{Cl}_2$  (5 mL) was added piperazine (331 mg). The mixture was stirred at rt for 12 h. The resulting solution was diluted with  $\text{CH}_2\text{Cl}_2$  (40 mL) and then was washed with  $\text{H}_2\text{O}$  (100 mL). The organic layer was dried over anhydrous  $\text{Na}_2\text{SO}_4$ , filtered, and then concentrated to dryness under vacuum. The residue was purified by silica gel column chromatography ( $\text{CH}_2\text{Cl}_2/\text{MeOH}/\text{NH}_3\cdot\text{H}_2\text{O} = 100:10:1$ ) to give primary amine. To a solution of this primary amine in  $\text{CH}_2\text{Cl}_2$  (5 mL) was added  $(\text{Boc})_2\text{O}$  (436 mg, 2 mmol) and  $\text{Et}_3\text{N}$  (202 mg, 2 mmol). The mixture was stirred at rt for 20 min. The resulting solution was purified by silica gel column chromatography ( $\text{CH}_2\text{Cl}_2/\text{EtOAc} = 50:1$ ) to give the desired product (241 mg, 62%) as a yellow solid.

**Physical State:** yellow solid.

**Melting Point:** 145.2 – 146.2 °C.

**TLC:**  $R_f = 0.42$  (PE/EtOAc = 3:1).

**$^1\text{H}$  NMR (400 MHz,  $\text{CDCl}_3$ )**  $\delta$  8.59 (s, 1H), 7.53 (d,  $J = 7.9$  Hz, 2H), 7.42 (t,  $J = 8.0$  Hz, 2H), 7.32 (d,  $J = 7.2$  Hz, 1H), 7.21 (t,  $J = 7.5$  Hz, 1H), 7.14 (d,  $J = 6.1$  Hz, 2H), 7.13 – 7.05 (m, 1H), 4.64 (s, 1H), 3.91 (s, 3H), 3.49 – 3.39 (m, 2H), 3.12 – 3.03 (m, 2H), 1.42 (s, 9H).

**$^{13}\text{C}$  NMR (101 MHz,  $\text{CDCl}_3$ )**  $\delta$  156.26, 137.12, 135.71, 133.19, 129.09, 128.28, 127.68, 121.72, 121.54, 120.67, 119.72, 119.49, 119.14, 110.69, 109.33, 108.48, 107.87, 79.60, 40.15, 32.88, 28.39(3C), 27.69.

**HRMS (ESI):** calcd for  $\text{C}_{24}\text{H}_{28}\text{N}_3\text{O}_2$   $[\text{M} + \text{H}]^+ m/z$  390.2176, found 390.2175.

## Compound 8

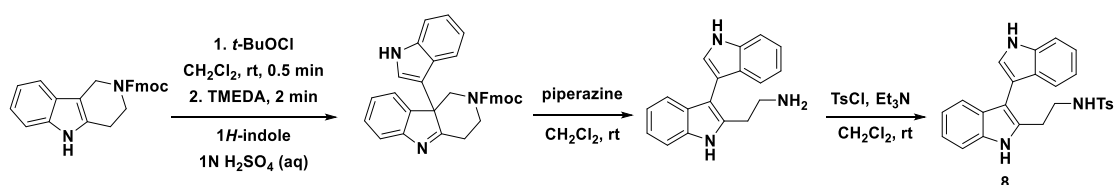

### *N*-(2-(1*H*,1'*H*-[3,3'-biindol]-2-yl)ethyl)-4-methylbenzenesulfonamide

To a solution of (9*H*-fluoren-9-yl)methyl 1,3,4,5-tetrahydro-2*H*-pyrido[4,3-*b*]indole-2-carboxylate (394 mg, 1.0 mmol) in CH<sub>2</sub>Cl<sub>2</sub> (8 mL) was added *tert*-butyl hypochlorite (130 mg, 1.2 mmol). The solution was stirred at rt for 0.5 min and then TMEDA (116 mg, 1.0 mmol) was added. The solution was stirred at rt for 2 min. Then 1*H*-indole (175 mg, 1.5 mmol) and 1 N H<sub>2</sub>SO<sub>4</sub> solution (1.0 mL, 1.0 mmol) were added into the mixture. The solution was stirred at rt for 10 h. The resulting mixture was diluted with CH<sub>2</sub>Cl<sub>2</sub> (40 mL) and then was washed with H<sub>2</sub>O (60 mL). The organic layer was dried over anhydrous Na<sub>2</sub>SO<sub>4</sub>, filtered, and then concentrated to dryness under vacuum to give the crude product. To a solution of this crude product in CH<sub>2</sub>Cl<sub>2</sub> (5 mL) was added piperazine (331 mg). The mixture was stirred at rt for 12 h. The resulting solution was diluted with CH<sub>2</sub>Cl<sub>2</sub> (40 mL) and then was washed with H<sub>2</sub>O (100 mL). The organic layer was dried over anhydrous Na<sub>2</sub>SO<sub>4</sub>, filtered, and then concentrated to dryness under vacuum. The residue was purified by silica gel column chromatography (CH<sub>2</sub>Cl<sub>2</sub>/MeOH/NH<sub>3</sub>•H<sub>2</sub>O = 100:10:1) to give primary amine. To a solution of this primary amine in CH<sub>2</sub>Cl<sub>2</sub> (5 mL) was added TsCl (381 mg, 2 mmol) and Et<sub>3</sub>N (202 mg, 2 mmol). The mixture was stirred at rt for 20 min. The resulting solution was purified by silica gel column chromatography (CH<sub>2</sub>Cl<sub>2</sub>/EtOAc = 50:1) to give the desired product (223 mg, 52%) as a white solid.

**Physical State:** white solid.

**Melting Point:** 180 – 182 °C.

**TLC:** R<sub>f</sub> = 0.47 (PE/EtOAc = 2:1).

**<sup>1</sup>H NMR (400 MHz, DMSO-*d*<sub>6</sub>)** δ 11.27 (s, 1H), 11.13 (s, 1H), 7.79 – 7.71 (m, 1H), 7.66 (d, *J* = 7.5 Hz, 2H), 7.53 (d, *J* = 7.6 Hz, 1H), 7.41 – 7.35 (m, 3H), 7.29 (d, *J* = 7.7 Hz, 2H), 7.18 (t, *J* = 7.0 Hz, 1H), 7.10 (t, *J* = 6.9 Hz, 1H), 7.05 – 6.95 (m, 2H), 3.20 – 3.09 (m, 2H), 3.05 – 2.93 (m, 2H), 2.34 (s, 3H).

**<sup>13</sup>C NMR (101 MHz, DMSO-*d*<sub>6</sub>)** δ 142.99, 138.02, 136.87, 136.19, 133.31, 130.01(3C), 127.74, 126.96(2C), 124.02, 121.50, 121.11, 120.09, 119.43, 119.06, 118.99, 112.12, 111.32, 108.88, 107.24, 43.22, 27.67, 21.40.

**HRMS (ESI):** calcd for C<sub>25</sub>H<sub>24</sub>N<sub>3</sub>O<sub>2</sub>S [M + H]<sup>+</sup>*m/z* 430.1584, found 430.1587.

## Compound 9

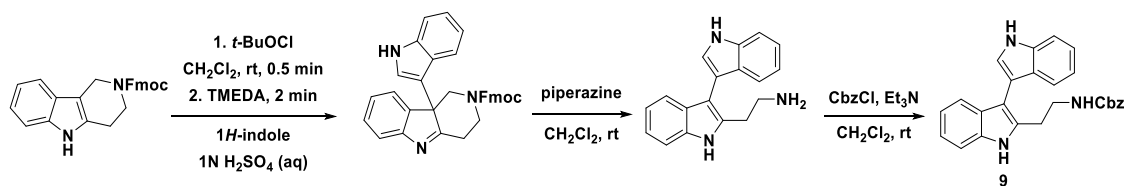

### ***Benzyl (2-(1*H*,1'*H*-[3,3'-biindol]-2-yl)ethyl)carbamate***

To a solution of (*9H*-fluoren-9-yl)methyl 1,3,4,5-tetrahydro-2*H*-pyrido[4,3-*b*]indole-2-carboxylate (394 mg, 1.0 mmol) in CH<sub>2</sub>Cl<sub>2</sub> (8 mL) was added *tert*-butyl hypochlorite (130 mg, 1.2 mmol). The solution was stirred at rt for 0.5 min and then TMEDA (116 mg, 1.0 mmol) was added. The solution was stirred at rt for 2 min. Then 1*H*-indole (175 mg, 1.5 mmol) and 1 N H<sub>2</sub>SO<sub>4</sub> solution (1.0 mL, 1.0 mmol) were added into the mixture. The solution was stirred at rt for 6 h. The resulting mixture was diluted with CH<sub>2</sub>Cl<sub>2</sub> (40 mL) and then was washed with H<sub>2</sub>O (60 mL). The organic layer was dried over anhydrous Na<sub>2</sub>SO<sub>4</sub>, filtered, and then concentrated to dryness under vacuum to give the crude product. To a solution of this crude product in CH<sub>2</sub>Cl<sub>2</sub> (5 mL) was added piperazine (331 mg). The mixture was stirred at rt for 12 h. The resulting solution was diluted with CH<sub>2</sub>Cl<sub>2</sub> (40 mL) and then was washed with H<sub>2</sub>O (100 mL). The organic layer was dried over anhydrous Na<sub>2</sub>SO<sub>4</sub>, filtered, and then concentrated to dryness under vacuum. The residue was purified by silica gel column chromatography (CH<sub>2</sub>Cl<sub>2</sub>/MeOH/NH<sub>3</sub>•H<sub>2</sub>O = 100:10:1) to give primary amine. To a solution of this primary amine in CH<sub>2</sub>Cl<sub>2</sub> (5 mL) was added CbzCl (341 mg, 2 mmol) and Et<sub>3</sub>N (202 mg, 2 mmol). The mixture was stirred at rt for 20 min. The resulting solution was purified by silica gel column chromatography (CH<sub>2</sub>Cl<sub>2</sub>/EtOAc = 50:1) to give the desired product (310 mg, 76%) as a light yellow solid.

**Physical State:** light yellow solid.

**Melting Point:** 96.3 – 96.8 °C.

**TLC:** R<sub>f</sub> = 0.52 (PE/EtOAc = 2:1).

**<sup>1</sup>H NMR (400 MHz, CDCl<sub>3</sub>)** δ 8.46 (s, 1H), 8.24 (s, 1H), 7.52 (d, *J* = 7.4 Hz, 2H), 7.47 (d, *J* = 8.2 Hz, 1H), 7.41 – 7.34 (m, 4H), 7.33 (s, 1H), 7.28 (d, *J* = 7.4 Hz, 2H), 7.28 – 7.19 (m, 2H), 7.16 – 7.07 (m, 2H), 5.07 (s, 2H), 4.84 (s, 1H), 3.47 (s, 2H), 3.06 (s, 2H).

**<sup>13</sup>C NMR (101 MHz, CDCl<sub>3</sub>)** δ 156.82, 136.52, 136.33, 135.77, 133.13, 129.04, 128.67(2C), 128.27, 128.11(3C), 127.84, 123.32, 122.20, 121.75, 120.53, 119.84, 119.72, 119.68, 111.49, 110.93, 107.94, 66.84, 40.88, 27.46.

**HRMS (ESI):** calcd for C<sub>26</sub>H<sub>24</sub>N<sub>3</sub>O<sub>2</sub> [M + H]<sup>+</sup>*m/z* 410.1863, found 410.1863.

## Compound 10

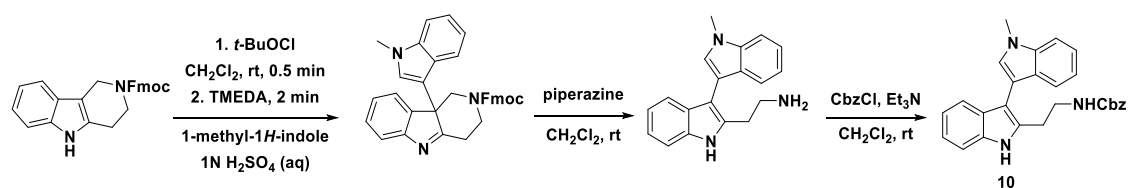

### ***Benzyl (2-(1'-methyl-1*H*,1'*H*-[3,3'-biindol]-2-yl)ethyl)carbamate***

To a solution of (*9H*-fluoren-9-yl)methyl 1,3,4,5-tetrahydro-2*H*-pyrido[4,3-*b*]indole-2-carboxylate (394 mg, 1.0 mmol) in CH<sub>2</sub>Cl<sub>2</sub> (8 mL) was added *tert*-butyl hypochlorite (130 mg, 1.2 mmol). The solution was stirred at rt for 0.5 min and then TMEDA (116 mg, 1.0 mmol) was added. The solution was stirred at rt for 2 min. Then 1-methyl-1*H*-indole (196 mg, 1.5 mmol) and 1 N H<sub>2</sub>SO<sub>4</sub> solution (1.0 mL, 1.0 mmol) were added into the mixture. The solution was stirred at rt for 30 min. The resulting mixture was diluted with CH<sub>2</sub>Cl<sub>2</sub> (40 mL) and then was washed with H<sub>2</sub>O (60 mL). The organic layer was dried over anhydrous Na<sub>2</sub>SO<sub>4</sub>, filtered, and then concentrated to dryness under vacuum to give the crude product. To a solution of this crude product in CH<sub>2</sub>Cl<sub>2</sub> (5 mL) was added piperazine (331 mg). The mixture was stirred at rt for 12 h. The resulting solution was diluted with CH<sub>2</sub>Cl<sub>2</sub> (40 mL) and then was washed with H<sub>2</sub>O (100 mL). The organic layer was dried over anhydrous Na<sub>2</sub>SO<sub>4</sub>, filtered, and then concentrated to dryness under vacuum. The residue was purified by silica gel column chromatography (CH<sub>2</sub>Cl<sub>2</sub>/MeOH/NH<sub>3</sub>•H<sub>2</sub>O = 100:10:1) to give primary amine. To a solution of this primary amine in CH<sub>2</sub>Cl<sub>2</sub> (5 mL) was added CbzCl (341 mg, 2 mmol) and Et<sub>3</sub>N (202 mg, 2 mmol). The mixture was stirred at rt for 20 min. The resulting solution was purified by silica gel column chromatography (CH<sub>2</sub>Cl<sub>2</sub>/EtOAc = 50:1) to give the desired product (288 mg, 68%) as a white solid.

### **Gram-scale:**

To a solution of (*9H*-fluoren-9-yl)methyl 1,3,4,5-tetrahydro-2*H*-pyrido[4,3-*b*]indole-2-carboxylate (394 mg, 5.0 mmol) in CH<sub>2</sub>Cl<sub>2</sub> (30 mL) was added *tert*-butyl hypochlorite (648 mg, 6 mmol). The solution was stirred at rt for 0.5 min and then TMEDA (580 mg, 5.0 mmol) was added. The solution was stirred at rt for 2 min. Then 1-methyl-1*H*-indole (984 mg, 7.5 mmol) and 1 N H<sub>2</sub>SO<sub>4</sub> solution (10.0 mL, 10.0 mmol) were added into the mixture. The solution was stirred at rt for 30 min. The resulting mixture was diluted with CH<sub>2</sub>Cl<sub>2</sub> (100 mL) and then was washed with H<sub>2</sub>O (150 mL). The organic layer was dried over anhydrous Na<sub>2</sub>SO<sub>4</sub>, filtered, and then concentrated to dryness under vacuum to give the crude product. To a solution of this crude product in CH<sub>2</sub>Cl<sub>2</sub> (15 mL) was added piperazine (1720 mg). The mixture was stirred at rt for 12 h. The resulting solution was diluted with CH<sub>2</sub>Cl<sub>2</sub> (100 mL) and then was washed with H<sub>2</sub>O (100 mL). The organic layer was dried over anhydrous Na<sub>2</sub>SO<sub>4</sub>, filtered, and then concentrated to dryness under vacuum. The residue was purified by silica gel column chromatography (CH<sub>2</sub>Cl<sub>2</sub>/MeOH/NH<sub>3</sub>•H<sub>2</sub>O = 100:10:1) to give primary amine. To a solution of this primary amine in CH<sub>2</sub>Cl<sub>2</sub> (5 mL) was added CbzCl (1705 mg, 10 mmol) and Et<sub>3</sub>N (1010 mg, 10 mmol). The mixture was stirred at rt for 20 min. The resulting solution was purified by silica gel column chromatography (CH<sub>2</sub>Cl<sub>2</sub>/EtOAc = 50:1) to give the desired

product (1520 mg, 72%) as a white solid.

**Physical State:** white solid.

**Melting Point:** 83.3 – 86.1 °C.

**TLC:**  $R_f = 0.44$  (PE/EtOAc = 2:1).

**$^1\text{H}$  NMR (400 MHz,  $\text{CDCl}_3$ )**  $\delta$  8.69 (s, 1H), 7.62 (t,  $J = 8.3$  Hz, 2H), 7.49 (d,  $J = 8.2$  Hz, 1H), 7.41 (s, 4H), 7.38 (s, 2H), 7.30 (d,  $J = 6.8$  Hz, 2H), 7.24 – 7.18 (m, 2H), 7.16 (s, 1H), 5.14 (s, 2H), 4.98 (s, 1H), 3.88 (s, 3H), 3.52 – 3.39 (m, 2H), 3.10 – 2.98 (m, 2H).

**$^{13}\text{C}$  NMR (126 MHz,  $\text{CDCl}_3$ )**  $\delta$  156.80, 137.22, 136.55, 135.83, 133.07, 129.17, 128.74, 128.68, 128.34, 128.12, 127.92, 127.78, 121.89, 121.69, 120.71, 119.87, 119.71, 119.61, 119.26, 110.86, 109.51, 108.46, 108.01, 66.88, 40.92, 32.94, 27.57.

**HRMS (ESI):** calcd for  $\text{C}_{27}\text{H}_{26}\text{N}_3\text{O}_2$   $[\text{M} + \text{H}]^+ m/z$  424.2020, found 424.2019.

## Compound 11

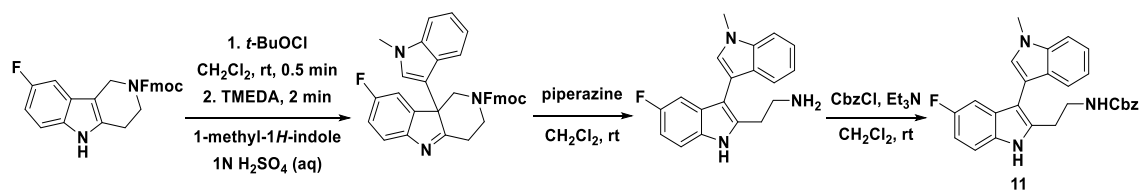

### ***Benzyl (2-(5-fluoro-1'-methyl-1*H*,1'*H*-[3,3'-biindol]-2-yl)ethyl)carbamate***

To a solution of (9*H*-fluoren-9-yl)methyl 8-fluoro-1,3,4,5-tetrahydro-2*H*-pyrido[4,3-*b*]indole-2-carboxylate (412 mg, 1.0 mmol) in CH<sub>2</sub>Cl<sub>2</sub> (8 mL) was added *tert*-butyl hypochlorite (130 mg, 1.2 mmol). The solution was stirred at rt for 0.5 min and then TMEDA (116 mg, 1.0 mmol) was added. The solution was stirred at rt for 2 min. Then 1-methyl-1*H*-indole (196 mg, 1.5 mmol) and 1 *N* H<sub>2</sub>SO<sub>4</sub> solution (1.0 mL, 1.0 mmol) were added into the mixture. The solution was stirred at rt for 30 min. The resulting mixture was diluted with CH<sub>2</sub>Cl<sub>2</sub> (40 mL) and then was washed with H<sub>2</sub>O (60 mL). The organic layer was dried over anhydrous Na<sub>2</sub>SO<sub>4</sub>, filtered, and then concentrated to dryness under vacuum to give the crude product. To a solution of this crude product in CH<sub>2</sub>Cl<sub>2</sub> (5 mL) was added piperazine (331 mg). The mixture was stirred at rt for 12 h. The resulting solution was diluted with CH<sub>2</sub>Cl<sub>2</sub> (40 mL) and then was washed with H<sub>2</sub>O (100 mL). The organic layer was dried over anhydrous Na<sub>2</sub>SO<sub>4</sub>, filtered, and then concentrated to dryness under vacuum. The residue was purified by silica gel column chromatography (CH<sub>2</sub>Cl<sub>2</sub>/MeOH/NH<sub>3</sub>•H<sub>2</sub>O = 100:10:1) to give primary amine. To a solution of this primary amine in CH<sub>2</sub>Cl<sub>2</sub> (5 mL) was added CbzCl (341 mg, 2 mmol) and Et<sub>3</sub>N (202 mg, 2 mmol). The mixture was stirred at rt for 20 min. The resulting solution was purified by silica gel column chromatography (CH<sub>2</sub>Cl<sub>2</sub>/EtOAc = 50:1) to give the desired product (255 mg, 58%) as a white solid.

**Physical State:** white solid.

**Melting Point:** 65 – 67.1 °C.

**TLC:** R<sub>f</sub> = 0.57 (PE/EtOAc = 2:1).

**<sup>1</sup>H NMR (500 MHz, CDCl<sub>3</sub>)** δ 8.76 (s, 1H), 7.47 (d, *J* = 7.9 Hz, 1H), 7.41 (s, 1H), 7.34 (dt, *J* = 4.9, 2.5 Hz, 4H), 7.30 (d, *J* = 8.0 Hz, 3H), 7.22 – 7.10 (m, 3H), 7.07 (s, 1H), 6.95 – 6.91 (m, 1H), 5.06 (s, 2H), 4.91 (s, 1H), 3.84 (s, 3H), 3.45 (d, *J* = 6.2 Hz, 2H), 3.02 (s, 2H).

**<sup>13</sup>C NMR (126 MHz, CDCl<sub>3</sub>)** δ 159.05, 157.19, 156.81, 137.18, 136.42, 134.99, 132.25, 129.66, 128.68, 128.32, 128.10, 127.76, 121.93, 120.44, 119.41, 111.37, 111.29, 109.94, 109.73, 109.52, 107.96, 104.74, 104.55, 66.92, 40.71, 32.93, 27.76.

**<sup>19</sup>F NMR (471 MHz, CDCl<sub>3</sub>)** δ -124.62.

**HRMS (ESI):** calcd for C<sub>27</sub>H<sub>26</sub>N<sub>3</sub>O<sub>2</sub> [M + H]<sup>+</sup>*m/z* 442.1925, found 442.1926

## Compound 12

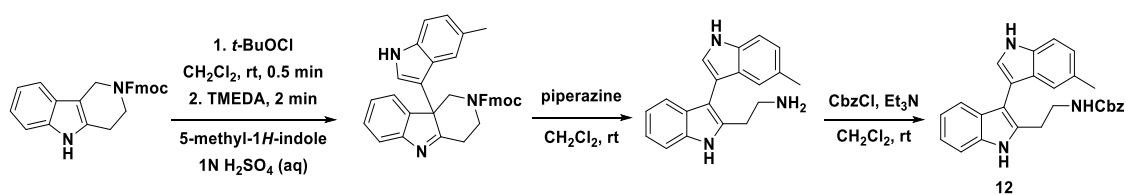

### ***Benzyl (2-(5'-methyl-1*H*,1'*H*-[3,3'-biindol]-2-yl)ethyl)carbamate***

To a solution of (*9H*-fluoren-9-yl)methyl 1,3,4,5-tetrahydro-2*H*-pyrido[4,3-*b*]indole-2-carboxylate (394 mg, 1.0 mmol) in CH<sub>2</sub>Cl<sub>2</sub> (8 mL) was added *tert*-butyl hypochlorite (130 mg, 1.2 mmol). The solution was stirred at rt for 0.5 min and then TMEDA (116 mg, 1.0 mmol) was added. The solution was stirred at rt for 2 min. Then 5-methyl-1*H*-indole (196 mg, 1.5 mmol) and 1 N H<sub>2</sub>SO<sub>4</sub> solution (1.0 mL, 1.0 mmol) were added into the mixture. The solution was stirred at rt for 10 h. The resulting mixture was diluted with CH<sub>2</sub>Cl<sub>2</sub> (40 mL) and then was washed with H<sub>2</sub>O (60 mL). The organic layer was dried over anhydrous Na<sub>2</sub>SO<sub>4</sub>, filtered, and then concentrated to dryness under vacuum to give the crude product. To a solution of this crude product in CH<sub>2</sub>Cl<sub>2</sub> (5 mL) was added piperazine (331 mg). The mixture was stirred at rt for 12 h. The resulting solution was diluted with CH<sub>2</sub>Cl<sub>2</sub> (40 mL) and then was washed with H<sub>2</sub>O (100 mL). The organic layer was dried over anhydrous Na<sub>2</sub>SO<sub>4</sub>, filtered, and then concentrated to dryness under vacuum. The residue was purified by silica gel column chromatography (CH<sub>2</sub>Cl<sub>2</sub>/MeOH/NH<sub>3</sub>•H<sub>2</sub>O = 100:10:1) to give primary amine. To a solution of this primary amine in CH<sub>2</sub>Cl<sub>2</sub> (5 mL) was added CbzCl (341 mg, 2 mmol) and Et<sub>3</sub>N (202 mg, 2 mmol). The mixture was stirred at rt for 20 min. The resulting solution was purified by silica gel column chromatography (CH<sub>2</sub>Cl<sub>2</sub>/EtOAc = 50:1) to give the desired product (273 mg, 65%) as a gray solid.

**Physical State:** gray solid.

**Melting Point:** 90.1 – 95.3 °C.

**TLC:** R<sub>f</sub> = 0.59 (PE/EtOAc = 2:1).

**<sup>1</sup>H NMR (400 MHz, CDCl<sub>3</sub>)** δ 8.47 (s, 1H), 8.15 (s, 1H), 7.51 (d, *J* = 7.9 Hz, 1H), 7.38 (d, *J* = 12.4 Hz, 3H), 7.36 (s, 2H), 7.33 (s, 1H), 7.30 (s, 1H), 7.22 (t, *J* = 7.5 Hz, 1H), 7.17 (s, 1H), 7.11 (t, *J* = 7.7 Hz, 2H), 5.07 (s, 2H), 4.85 (s, 1H), 3.45 (s, 2H), 3.04 (s, 2H), 2.41 (s, 3H).

**<sup>13</sup>C NMR (101 MHz, CDCl<sub>3</sub>)** δ 156.89, 136.56, 135.80, 134.72, 133.20, 129.13, 129.00, 128.70(2C), 128.29, 128.19, 128.12(2C), 123.90, 123.59, 121.74, 120.09, 119.91, 119.69, 111.23, 110.98, 109.22, 108.10, 66.87, 40.96, 27.45, 21.68.

**HRMS (ESI):** calcd for C<sub>27</sub>H<sub>26</sub>N<sub>3</sub>O<sub>2</sub> [M + H]<sup>+</sup> *m/z* 424.2020, found 424.2019.



## Compound 13

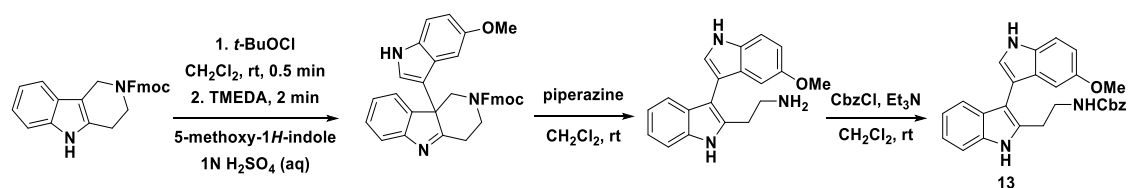

### ***Benzyl (2-(5'-methoxy-1*H*,1'*H*-[3,3'-biindol]-2-yl)ethyl)carbamate***

To a solution of (*9H*-fluoren-9-yl)methyl 1,3,4,5-tetrahydro-2*H*-pyrido[4,3-*b*]indole-2-carboxylate (394 mg, 1.0 mmol) in CH<sub>2</sub>Cl<sub>2</sub> (8 mL) was added *tert*-butyl hypochlorite (130 mg, 1.2 mmol). The solution was stirred at rt for 0.5 min and then TMEDA (116 mg, 1.0 mmol) was added. The solution was stirred at rt for 2 min. Then 5-methoxy-1*H*-indole (221 mg, 1.5 mmol) and 1 N H<sub>2</sub>SO<sub>4</sub> solution (1.0 mL, 1.0 mmol) were added into the mixture. The solution was stirred at rt for 10 h. The resulting mixture was diluted with CH<sub>2</sub>Cl<sub>2</sub> (40 mL) and then was washed with H<sub>2</sub>O (60 mL). The organic layer was dried over anhydrous Na<sub>2</sub>SO<sub>4</sub>, filtered, and then concentrated to dryness under vacuum to give the crude product. To a solution of this crude product in CH<sub>2</sub>Cl<sub>2</sub> (5 mL) was added piperazine (331 mg). The mixture was stirred at rt for 12 h. The resulting solution was diluted with CH<sub>2</sub>Cl<sub>2</sub> (40 mL) and then was washed with H<sub>2</sub>O (100 mL). The organic layer was dried over anhydrous Na<sub>2</sub>SO<sub>4</sub>, filtered, and then concentrated to dryness under vacuum. The residue was purified by silica gel column chromatography (CH<sub>2</sub>Cl<sub>2</sub>/MeOH/NH<sub>3</sub>•H<sub>2</sub>O = 100:10:1) to give primary amine. To a solution of this primary amine in CH<sub>2</sub>Cl<sub>2</sub> (5 mL) was added CbzCl (341 mg, 2 mmol) and Et<sub>3</sub>N (202 mg, 2 mmol). The mixture was stirred at rt for 20 min. The resulting solution was purified by silica gel column chromatography (CH<sub>2</sub>Cl<sub>2</sub>/EtOAc = 30:1) to give the desired product (299 mg, 68%) as a yellow solid.

**Physical State:** yellow solid.

**Melting Point:** 68.8 – 71.8 °C.

**TLC:** R<sub>f</sub> = 0.48 (PE/EtOAc = 2:1).

**<sup>1</sup>H NMR (400 MHz, CDCl<sub>3</sub>)** δ 8.48 (s, 1H), 8.16 (s, 1H), 7.52 (d, *J* = 7.8 Hz, 1H), 7.39 (s, 2H), 7.38 – 7.34 (m, 3H), 7.33 (s, 1H), 7.32 (s, 1H), 7.24 – 7.19 (m, 1H), 7.17 (s, 1H), 7.11 (t, *J* = 7.4 Hz, 1H), 6.93 (d, *J* = 7.6 Hz, 2H), 5.07 (s, 2H), 4.87 (s, 1H), 3.73 (s, 3H), 3.50 – 3.34 (m, 2H), 3.11 – 3.00 (m, 2H).

**<sup>13</sup>C NMR (101 MHz, CDCl<sub>3</sub>)** δ 157.01, 154.20, 136.59, 135.92, 133.25, 131.64, 129.01, 128.82, 128.74, 128.36, 128.32, 128.18, 128.10, 124.32, 121.81, 119.95, 119.73, 112.70, 112.44, 111.14, 109.56, 108.03, 102.09, 66.89, 55.92, 41.08, 27.47.

**HRMS (ESI):** calcd for C<sub>27</sub>H<sub>26</sub>N<sub>3</sub>O<sub>2</sub> [M + H]<sup>+</sup> *m/z* 440.1969, found 440.1972.

## Compound 14

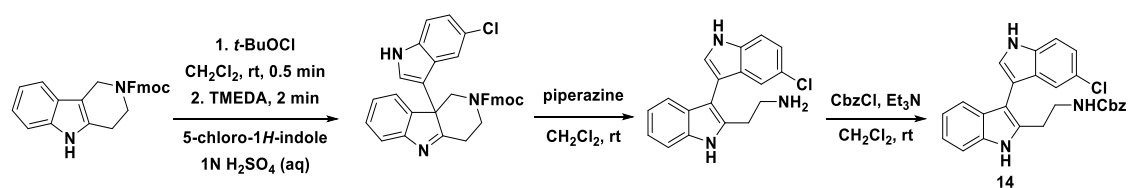

### ***Benzyl (2-(5'-chloro-1*H*,1'*H*-[3,3'-biindol]-2-yl)ethyl)carbamate***

To a solution of (*9H*-fluoren-9-yl)methyl 1,3,4,5-tetrahydro-2*H*-pyrido[4,3-*b*]indole-2-carboxylate (394 mg, 1.0 mmol) in CH<sub>2</sub>Cl<sub>2</sub> (8 mL) was added *tert*-butyl hypochlorite (130 mg, 1.2 mmol). The solution was stirred at rt for 0.5 min and then TMEDA (116 mg, 1.0 mmol) was added. The solution was stirred at rt for 2 min. Then 5-chloro-1*H*-indole (226 mg, 1.5 mmol) and 1 N H<sub>2</sub>SO<sub>4</sub> solution (1.0 mL, 1.0 mmol) were added into the mixture. The solution was stirred at rt for 10 h. The resulting mixture was diluted with CH<sub>2</sub>Cl<sub>2</sub> (40 mL) and then was washed with H<sub>2</sub>O (60 mL). The organic layer was dried over anhydrous Na<sub>2</sub>SO<sub>4</sub>, filtered, and then concentrated to dryness under vacuum to give the crude product. To a solution of this crude product in CH<sub>2</sub>Cl<sub>2</sub> (5 mL) was added piperazine (331 mg). The mixture was stirred at rt for 12 h. The resulting solution was diluted with CH<sub>2</sub>Cl<sub>2</sub> (40 mL) and then was washed with H<sub>2</sub>O (100 mL). The organic layer was dried over anhydrous Na<sub>2</sub>SO<sub>4</sub>, filtered, and then concentrated to dryness under vacuum. The residue was purified by silica gel column chromatography (CH<sub>2</sub>Cl<sub>2</sub>/MeOH/NH<sub>3</sub>•H<sub>2</sub>O = 100:10:1) to give primary amine. To a solution of this primary amine in CH<sub>2</sub>Cl<sub>2</sub> (5 mL) was added CbzCl (341 mg, 2 mmol) and Et<sub>3</sub>N (202 mg, 2 mmol). The mixture was stirred at rt for 20 min. The resulting solution was purified by silica gel column chromatography (CH<sub>2</sub>Cl<sub>2</sub>/EtOAc = 50:1) to give the desired product (284 mg, 64%) as a light yellow solid.

**Physical State:** light yellow solid.

**Melting Point:** 96.2 – 100.3 °C.

**TLC:** R<sub>f</sub> = 0.48 (PE/EtOAc = 3:1).

**<sup>1</sup>H NMR (400 MHz, CDCl<sub>3</sub>)** δ 8.50 (s, 1H), 8.26 (s, 1H), 7.46 (d, *J* = 8.1 Hz, 2H), 7.38 (d, *J* = 11.5 Hz, 2H), 7.37 – 7.33 (m, 2H), 7.34 – 7.30 (m, 2H), 7.29 (s, 1H), 7.25 (s, 1H), 7.24 – 7.19 (m, 2H), 7.12 (t, *J* = 7.4 Hz, 1H), 5.07 (s, 2H), 4.85 (s, 1H), 3.51 – 3.39 (m, 2H), 3.09 – 2.95 (m, 2H).

**<sup>13</sup>C NMR (101 MHz, CDCl<sub>3</sub>)** δ 157.03, 136.51, 135.87, 134.82, 133.49, 129.06, 128.97, 128.79(2C), 128.41, 128.11(2C), 125.45, 124.91, 122.55, 121.99, 119.98, 119.79, 119.68, 112.77, 111.17, 109.54, 107.37, 66.98, 41.01, 27.41.

**HRMS (ESI):** calcd for C<sub>26</sub>H<sub>23</sub>ClN<sub>3</sub>O<sub>2</sub> [M + H]<sup>+</sup> *m/z* 444.1473, found 444.1477.

## Compound 15

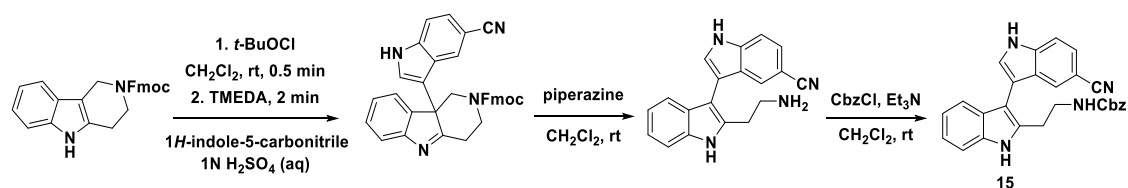

### ***Benzyl (2-(5'-cyano-1*H*,1'*H*-[3,3'-biindol]-2-yl)ethyl)carbamate***

To a solution of (*9H*-fluoren-9-yl)methyl 1,3,4,5-tetrahydro-2*H*-pyrido[4,3-*b*]indole-2-carboxylate (394 mg, 1.0 mmol) in CH<sub>2</sub>Cl<sub>2</sub> (8 mL) was added *tert*-butyl hypochlorite (130 mg, 1.2 mmol). The solution was stirred at rt for 0.5 min and then TMEDA (116 mg, 1.0 mmol) was added. The solution was stirred at rt for 2 min. Then 1*H*-indole-5-carbonitrile (213 mg, 1.5 mmol) and 1 *N* H<sub>2</sub>SO<sub>4</sub> solution (1.0 mL, 1.0 mmol) were added into the mixture. The solution was stirred at rt for 10 h. The resulting mixture was diluted with CH<sub>2</sub>Cl<sub>2</sub> (40 mL) and then was washed with H<sub>2</sub>O (60 mL). The organic layer was dried over anhydrous Na<sub>2</sub>SO<sub>4</sub>, filtered, and then concentrated to dryness under vacuum to give the crude product. To a solution of this crude product in CH<sub>2</sub>Cl<sub>2</sub> (5 mL) was added piperazine (331 mg). The mixture was stirred at rt for 12 h. The resulting solution was diluted with CH<sub>2</sub>Cl<sub>2</sub> (40 mL) and then was washed with H<sub>2</sub>O (100 mL). The organic layer was dried over anhydrous Na<sub>2</sub>SO<sub>4</sub>, filtered, and then concentrated to dryness under vacuum. The residue was purified by silica gel column chromatography (CH<sub>2</sub>Cl<sub>2</sub>/MeOH/NH<sub>3</sub>•H<sub>2</sub>O = 100:10:1) to give primary amine. To a solution of this primary amine in CH<sub>2</sub>Cl<sub>2</sub> (5 mL) was added CbzCl (341 mg, 2 mmol) and Et<sub>3</sub>N (202 mg, 2 mmol). The mixture was stirred at rt for 20 min. The resulting solution was purified by silica gel column chromatography (CH<sub>2</sub>Cl<sub>2</sub>/EtOAc = 30:1) to give the desired product (135 mg, 31%) as a light yellow solid.

**Physical State:** light yellow solid.

**Melting Point:** 83.3 – 85.2 °C.

**TLC:** R<sub>f</sub> = 0.30 (PE/EtOAc = 1:1).

**<sup>1</sup>H NMR (400 MHz, CDCl<sub>3</sub>)** δ 8.56 (s, 1H), 8.50 (s, 1H), 7.86 (s, 1H), 7.49 (s, 2H), 7.41 (d, *J* = 7.1 Hz, 2H), 7.39 – 7.35 (m, 2H), 7.34 – 7.30 (m, 2H), 7.28 (d, *J* = 8.5 Hz, 2H), 7.24 (d, *J* = 7.7 Hz, 1H), 7.13 (t, *J* = 7.2 Hz, 1H), 5.07 (s, 2H), 4.87 (s, 1H), 3.56 – 3.42 (m, 2H), 3.13 – 2.95 (m, 2H).

**<sup>13</sup>C NMR (101 MHz, CDCl<sub>3</sub>)** δ 156.73, 137.99, 136.32, 135.71, 133.45, 128.65, 128.62(2C), 128.25, 128.05(2C), 127.66, 126.03, 125.21, 124.94, 121.99, 121.03, 119.98, 119.23, 112.37, 110.99, 110.81, 106.52, 102.34, 66.84, 40.80, 27.45.

**HRMS (ESI):** calcd for C<sub>27</sub>H<sub>23</sub>N<sub>4</sub>O<sub>2</sub> [M + H]<sup>+</sup> *m/z* 435.1816, found 435.1816.

## Compound 16

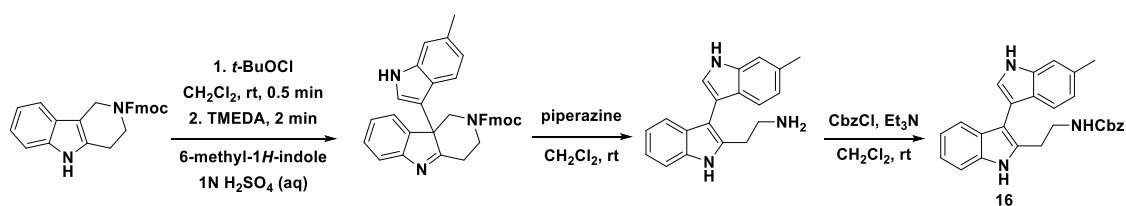

### **Benzyl (2-(6'-methyl-1H,1'H-[3,3'-biindol]-2-yl)ethyl)carbamate**

To a solution of (9H-fluoren-9-yl)methyl 1,3,4,5-tetrahydro-2H-pyrido[4,3-b]indole-2-carboxylate (394 mg, 1.0 mmol) in CH<sub>2</sub>Cl<sub>2</sub> (8 mL) was added *tert*-butyl hypochlorite (130 mg, 1.2 mmol). The solution was stirred at rt for 0.5 min and then TMEDA (116 mg, 1.0 mmol) was added. The solution was stirred at rt for 2 min. Then 6-methyl-1H-indole (196 mg, 1.5 mmol) and 1 N H<sub>2</sub>SO<sub>4</sub> solution (1.0 mL, 1.0 mmol) were added into the mixture. The solution was stirred at rt for 10 h. The resulting mixture was diluted with CH<sub>2</sub>Cl<sub>2</sub> (40 mL) and then was washed with H<sub>2</sub>O (60 mL). The organic layer was dried over anhydrous Na<sub>2</sub>SO<sub>4</sub>, filtered, and then concentrated to dryness under vacuum to give the crude product. To a solution of this crude product in CH<sub>2</sub>Cl<sub>2</sub> (5 mL) was added piperazine (331 mg). The mixture was stirred at rt for 12 h. The resulting solution was diluted with CH<sub>2</sub>Cl<sub>2</sub> (40 mL) and then was washed with H<sub>2</sub>O (100 mL). The organic layer was dried over anhydrous Na<sub>2</sub>SO<sub>4</sub>, filtered, and then concentrated to dryness under vacuum. The residue was purified by silica gel column chromatography (CH<sub>2</sub>Cl<sub>2</sub>/MeOH/NH<sub>3</sub>•H<sub>2</sub>O = 100:10:1) to give primary amine. To a solution of this primary amine in CH<sub>2</sub>Cl<sub>2</sub> (5 mL) was added CbzCl (341 mg, 2 mmol) and Et<sub>3</sub>N (202 mg, 2 mmol). The mixture was stirred at rt for 20 min. The resulting solution was purified by silica gel column chromatography (CH<sub>2</sub>Cl<sub>2</sub>/EtOAc = 50:1) to give the desired product (237 mg, 56%) as a yellow solid.

**Physical State:** yellow solid.

**Melting Point:** 90 – 91 °C.

**TLC:** R<sub>f</sub> = 0.42 (PE/EtOAc = 3:1).

**<sup>1</sup>H NMR (400 MHz, CDCl<sub>3</sub>)** δ 8.46 (s, 1H), 8.12 (s, 1H), 7.51 (d, *J* = 7.9 Hz, 1H), 7.40 (d, *J* = 8.1 Hz, 2H), 7.37 (s, 1H), 7.36 (s, 2H), 7.32 (d, *J* = 7.3 Hz, 2H), 7.29 (s, 1H), 7.21 (t, *J* = 7.5 Hz, 1H), 7.16 – 7.11 (m, 1H), 7.10 – 7.05 (m, 1H), 6.96 (d, *J* = 8.1 Hz, 1H), 5.07 (s, 2H), 4.84 (s, 1H), 3.54 – 3.36 (m, 2H), 3.10 – 2.98 (m, 2H), 2.52 (s, 3H).

**<sup>13</sup>C NMR (101 MHz, CDCl<sub>3</sub>)** δ 156.98, 136.93, 136.66, 135.91, 133.20, 132.05, 129.13, 128.78(2C), 128.36, 128.17(2C), 125.84, 122.83, 121.82, 121.64, 120.34, 120.01, 119.76, 111.64, 111.10, 109.62, 108.19, 66.92, 41.04, 27.48, 21.97.

**HRMS (ESI):** calcd for C<sub>27</sub>H<sub>26</sub>N<sub>3</sub>O<sub>2</sub> [M + H]<sup>+</sup> *m/z* 424.2020, found 424.2019.

## Compound 17

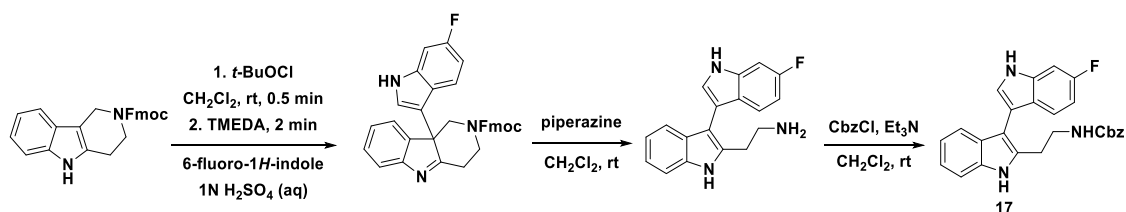

### ***Benzyl (2-(6'-fluoro-1*H*,1'*H*-[3,3'-biindol]-2-yl)ethyl)carbamate***

To a solution of (*9H*-fluoren-9-yl)methyl 1,3,4,5-tetrahydro-2*H*-pyrido[4,3-*b*]indole-2-carboxylate (394 mg, 1.0 mmol) in CH<sub>2</sub>Cl<sub>2</sub> (8 mL) was added *tert*-butyl hypochlorite (130 mg, 1.2 mmol). The solution was stirred at rt for 0.5 min and then TMEDA (116 mg, 1.0 mmol) was added. The solution was stirred at rt for 2 min. Then 6-fluoro-1*H*-indole (202 mg, 1.5 mmol) and 1 N H<sub>2</sub>SO<sub>4</sub> solution (1.0 mL, 1.0 mmol) were added into the mixture. The solution was stirred at rt for 10 h. The resulting mixture was diluted with CH<sub>2</sub>Cl<sub>2</sub> (40 mL) and then was washed with H<sub>2</sub>O (60 mL). The organic layer was dried over anhydrous Na<sub>2</sub>SO<sub>4</sub>, filtered, and then concentrated to dryness under vacuum to give the crude product. To a solution of this crude product in CH<sub>2</sub>Cl<sub>2</sub> (5 mL) was added piperazine (331 mg). The mixture was stirred at rt for 12 h. The resulting solution was diluted with CH<sub>2</sub>Cl<sub>2</sub> (40 mL) and then was washed with H<sub>2</sub>O (100 mL). The organic layer was dried over anhydrous Na<sub>2</sub>SO<sub>4</sub>, filtered, and then concentrated to dryness under vacuum. The residue was purified by silica gel column chromatography (CH<sub>2</sub>Cl<sub>2</sub>/MeOH/NH<sub>3</sub>•H<sub>2</sub>O = 100:10:1) to give primary amine. To a solution of this primary amine in CH<sub>2</sub>Cl<sub>2</sub> (5 mL) was added CbzCl (341 mg, 2 mmol) and Et<sub>3</sub>N (202 mg, 2 mmol). The mixture was stirred at rt for 20 min. The resulting solution was purified by silica gel column chromatography (CH<sub>2</sub>Cl<sub>2</sub>/EtOAc = 50:1) to give the desired product (332 mg, 78%) as a light yellow solid.

**Physical State:** light yellow solid.

**Melting Point:** 150.6 – 151.8 °C.

**TLC:** R<sub>f</sub> = 0.42 (PE/EtOAc = 3:1).

**<sup>1</sup>H NMR (400 MHz, CDCl<sub>3</sub>)** δ 8.48 (s, 1H), 8.20 (s, 1H), 7.48 (d, *J* = 7.8 Hz, 1H), 7.40 (d, *J* = 5.3 Hz, 2H), 7.37 (d, *J* = 5.7 Hz, 3H), 7.34 – 7.30 (m, 2H), 7.22 (t, *J* = 7.5 Hz, 1H), 7.17 (s, 1H), 7.13 (s, 1H), 7.10 (d, *J* = 7.7 Hz, 1H), 6.87 (t, *J* = 9.1 Hz, 1H), 5.07 (s, 2H), 4.85 (s, 1H), 3.55 – 3.41 (m, 2H), 3.11 – 2.97 (m, 2H).

**<sup>13</sup>C NMR (101 MHz, CDCl<sub>3</sub>)** δ 160.14 (d, *J* = 237.3 Hz), 157.00, 136.47, 136.29 (d, *J* = 12.5 Hz), 135.87, 133.34, 128.98, 128.76(2C), 128.39, 128.10(2C), 124.49, 123.57, 123.56, 121.93, 121.26 (d, *J* = 10.2 Hz), 119.84 (d, *J* = 2.9 Hz), 111.13, 109.83, 108.46 (d, *J* = 24.3 Hz), 107.69, 97.77 (d, *J* = 26.0 Hz), 66.96, 41.00, 27.40.

**<sup>19</sup>F NMR (376 MHz, CDCl<sub>3</sub>)** δ -120.81.

**HRMS (ESI):** calcd for C<sub>26</sub>H<sub>23</sub>N<sub>3</sub>O<sub>2</sub> [M + H]<sup>+</sup>*m/z* 428.1769, found 428.1769.

## Compound 18

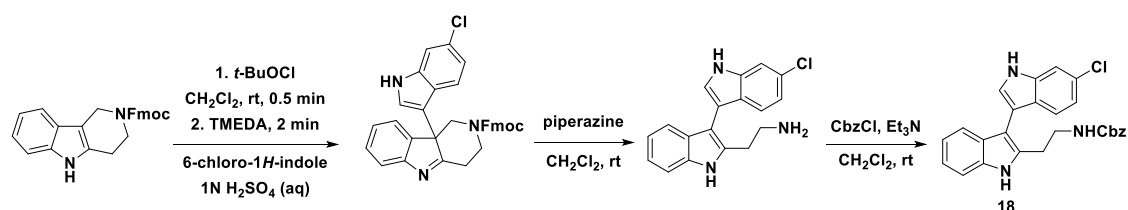

### ***Benzyl (2-(6'-chloro-1*H*,1'*H*-[3,3'-biindol]-2-yl)ethyl)carbamate***

To a solution of (9*H*-fluoren-9-yl)methyl 1,3,4,5-tetrahydro-2*H*-pyrido[4,3-*b*]indole-2-carboxylate (394 mg, 1.0 mmol) in CH<sub>2</sub>Cl<sub>2</sub> (8 mL) was added *tert*-butyl hypochlorite (130 mg, 1.2 mmol). The solution was stirred at rt for 0.5 min and then TMEDA (116 mg, 1.0 mmol) was added. The solution was stirred at rt for 2 min. Then 6-chloro-1*H*-indole (226 mg, 1.5 mmol) and 1 N H<sub>2</sub>SO<sub>4</sub> solution (1.0 mL, 1.0 mmol) were added into the mixture. The solution was stirred at rt for 10 h. The resulting mixture was diluted with CH<sub>2</sub>Cl<sub>2</sub> (40 mL) and then was washed with H<sub>2</sub>O (60 mL). The organic layer was dried over anhydrous Na<sub>2</sub>SO<sub>4</sub>, filtered, and then concentrated to dryness under vacuum to give the crude product. To a solution of this crude product in CH<sub>2</sub>Cl<sub>2</sub> (5 mL) was added piperazine (331 mg). The mixture was stirred at rt for 12 h. The resulting solution was diluted with CH<sub>2</sub>Cl<sub>2</sub> (40 mL) and then was washed with H<sub>2</sub>O (100 mL). The organic layer was dried over anhydrous Na<sub>2</sub>SO<sub>4</sub>, filtered, and then concentrated to dryness under vacuum. The residue was purified by silica gel column chromatography (CH<sub>2</sub>Cl<sub>2</sub>/MeOH/NH<sub>3</sub>•H<sub>2</sub>O = 100:10:1) to give primary amine. To a solution of this primary amine in CH<sub>2</sub>Cl<sub>2</sub> (5 mL) was added CbzCl (341 mg, 2 mmol) and Et<sub>3</sub>N (202 mg, 2 mmol). The mixture was stirred at rt for 20 min. The resulting solution was purified by silica gel column chromatography (CH<sub>2</sub>Cl<sub>2</sub>/EtOAc = 50:1) to give the desired product (332 mg, 75%) as a brown solid.

**Physical State:** brown solid.

**Melting Point:** 53.6 – 54.5 °C.

**TLC:** R<sub>f</sub> = 0.46 (PE/EtOAc = 3:1).

**<sup>1</sup>H NMR (400 MHz, CDCl<sub>3</sub>)** δ 8.49 (s, 1H), 8.22 (s, 1H), 7.45 (d, *J* = 11.0 Hz, 2H), 7.39 (d, *J* = 8.7 Hz, 3H), 7.36 (s, 2H), 7.34 – 7.30 (m, 2H), 7.22 (t, *J* = 7.7 Hz, 1H), 7.19 (s, 1H), 7.14 – 7.03 (m, 2H), 5.06 (s, 2H), 4.84 (t, *J* = 6.3 Hz, 1H), 3.56 – 3.33 (m, 2H), 3.09 – 3.00 (m, 2H).

**<sup>13</sup>C NMR (101 MHz, CDCl<sub>3</sub>)** δ 157.09, 136.83, 136.51, 135.95, 133.49, 129.02, 128.85(2C), 128.48, 128.15(2C), 128.04, 126.55, 124.11, 122.03, 121.50, 120.47, 119.97, 119.85, 111.57, 111.26, 109.93, 107.57, 67.04, 41.07, 27.44.

**HRMS (ESI):** calcd for C<sub>26</sub>H<sub>23</sub>ClN<sub>3</sub>O<sub>2</sub> [M + H]<sup>+</sup> *m/z* 444.1473, found 444.1477.

## Compound 19

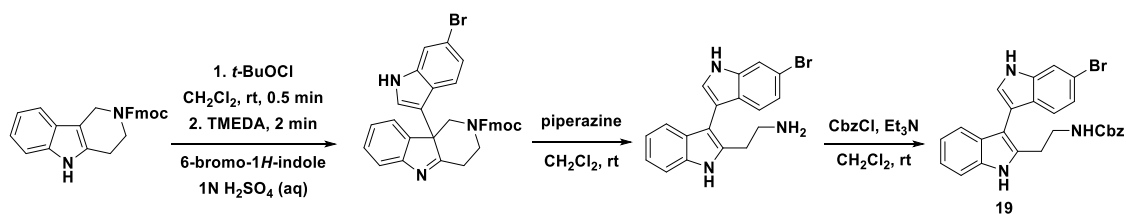

### ***Benzyl (2-(6'-bromo-1*H*,1'*H*-[3,3'-biindol]-2-yl)ethyl)carbamate***

To a solution of (*9H*-fluoren-9-yl)methyl 1,3,4,5-tetrahydro-2*H*-pyrido[4,3-*b*]indole-2-carboxylate (394 mg, 1.0 mmol) in CH<sub>2</sub>Cl<sub>2</sub> (8 mL) was added *tert*-butyl hypochlorite (130 mg, 1.2 mmol). The solution was stirred at rt for 0.5 min and then TMEDA (116 mg, 1.0 mmol) was added. The solution was stirred at rt for 2 min. Then 6-bromo-1*H*-indole (294 mg, 1.5 mmol) and 1 N H<sub>2</sub>SO<sub>4</sub> solution (1.0 mL, 1.0 mmol) were added into the mixture. The solution was stirred at rt for 10 h. The resulting mixture was diluted with CH<sub>2</sub>Cl<sub>2</sub> (40 mL) and then was washed with H<sub>2</sub>O (60 mL). The organic layer was dried over anhydrous Na<sub>2</sub>SO<sub>4</sub>, filtered, and then concentrated to dryness under vacuum to give the crude product. To a solution of this crude product in CH<sub>2</sub>Cl<sub>2</sub> (5 mL) was added piperazine (331 mg). The mixture was stirred at rt for 12 h. The resulting solution was diluted with CH<sub>2</sub>Cl<sub>2</sub> (40 mL) and then was washed with H<sub>2</sub>O (100 mL). The organic layer was dried over anhydrous Na<sub>2</sub>SO<sub>4</sub>, filtered, and then concentrated to dryness under vacuum. The residue was purified by silica gel column chromatography (CH<sub>2</sub>Cl<sub>2</sub>/MeOH/NH<sub>3</sub>•H<sub>2</sub>O = 100:10:1) to give primary amine. To a solution of this primary amine in CH<sub>2</sub>Cl<sub>2</sub> (5 mL) was added CbzCl (341 mg, 2 mmol) and Et<sub>3</sub>N (202 mg, 2 mmol). The mixture was stirred at rt for 20 min. The resulting solution was purified by silica gel column chromatography (CH<sub>2</sub>Cl<sub>2</sub>/EtOAc = 50:1) to give the desired product (254 mg, 59%) as a light yellow solid.

**Physical State:** light yellow solid.

**Melting Point:** 70.2 – 72.9 °C.

**TLC:** R<sub>f</sub> = 0.45 (PE/EtOAc = 3:1).

**<sup>1</sup>H NMR (400 MHz, CDCl<sub>3</sub>)** δ 8.48 (s, 1H), 8.23 (s, 1H), 7.60 (s, 1H), 7.46 (d, *J* = 7.4 Hz, 1H), 7.37 (s, 4H), 7.31 (d, *J* = 13.7 Hz, 3H), 7.26 – 7.18 (m, 2H), 7.17 (s, 1H), 7.15 – 7.07 (m, 1H), 5.06 (s, 2H), 4.84 (s, 1H), 3.63 – 3.24 (m, 2H), 3.24 – 2.92 (m, 2H).

**<sup>13</sup>C NMR (101 MHz, CDCl<sub>3</sub>)** δ 156.96, 137.20, 136.44, 135.85, 133.39, 128.93, 128.77(2C), 128.40, 128.12(2C), 126.77, 123.93, 122.95, 121.95, 121.80, 119.88, 119.74, 115.70, 114.45, 111.14, 109.94, 107.44, 66.96, 40.97, 27.41.

**HRMS (ESI):** calcd for C<sub>26</sub>H<sub>23</sub>BrN<sub>3</sub>O<sub>2</sub> [M + H]<sup>+</sup>*m/z* 488.0968, found 488.0971.

## Compound 20

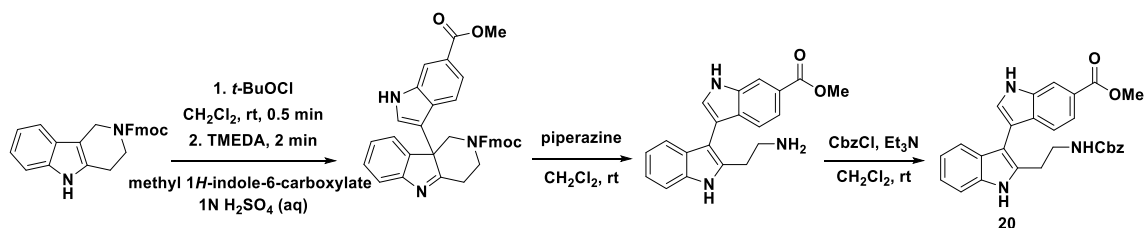

### **Methyl 2'--(2-(((benzyloxy)carbonyl)amino)ethyl)-1H,1'H-[3,3'-biindole]-6-carboxylate**

To a solution of (9H-fluoren-9-yl)methyl 1,3,4,5-tetrahydro-2H-pyrido[4,3-b]indole-2-carboxylate (394 mg, 1.0 mmol) in CH<sub>2</sub>Cl<sub>2</sub> (8 mL) was added *tert*-butyl hypochlorite (130 mg, 1.2 mmol). The solution was stirred at rt for 0.5 min and then TMEDA (116 mg, 1.0 mmol) was added. The solution was stirred at rt for 2 min. Then methyl 1H-indole-6-carboxylate (263 mg, 1.5 mmol) and 1 N H<sub>2</sub>SO<sub>4</sub> solution (1.0 mL, 1.0 mmol) were added into the mixture. The solution was stirred at rt for 10 h. The resulting mixture was diluted with CH<sub>2</sub>Cl<sub>2</sub> (40 mL) and then was washed with H<sub>2</sub>O (60 mL). The organic layer was dried over anhydrous Na<sub>2</sub>SO<sub>4</sub>, filtered, and then concentrated to dryness under vacuum to give the crude product. To a solution of this crude product in CH<sub>2</sub>Cl<sub>2</sub> (5 mL) was added piperazine (331 mg). The mixture was stirred at rt for 12 h. The resulting solution was diluted with CH<sub>2</sub>Cl<sub>2</sub> (40 mL) and then was washed with H<sub>2</sub>O (100 mL). The organic layer was dried over anhydrous Na<sub>2</sub>SO<sub>4</sub>, filtered, and then concentrated to dryness under vacuum. The residue was purified by silica gel column chromatography (CH<sub>2</sub>Cl<sub>2</sub>/MeOH/NH<sub>3</sub>•H<sub>2</sub>O = 100:10:1) to give primary amine. To a solution of this primary amine in CH<sub>2</sub>Cl<sub>2</sub> (5 mL) was added CbzCl (341 mg, 2 mmol) and Et<sub>3</sub>N (202 mg, 2 mmol). The mixture was stirred at rt for 20 min. The resulting solution was purified by silica gel column chromatography (CH<sub>2</sub>Cl<sub>2</sub>/EtOAc = 10:1) to give the desired product (243 mg, 52%) as a light yellow solid.

**Physical State:** light yellow solid.

**Melting Point:** 83.3 – 85.8 °C.

**TLC:** R<sub>f</sub> = 0.37 (PE/EtOAc = 2:1).

**<sup>1</sup>H NMR (400 MHz, CDCl<sub>3</sub>)** δ 8.55 (s, 1H), 8.53 (s, 1H), 8.23 (s, 1H), 7.81 (d, *J* = 8.4 Hz, 1H), 7.52 (d, *J* = 8.4 Hz, 1H), 7.46 (d, *J* = 7.8 Hz, 1H), 7.40 (d, *J* = 8.5 Hz, 1H), 7.35 (s, 4H), 7.32 (s, 2H), 7.23 (t, *J* = 7.5 Hz, 1H), 7.11 (t, *J* = 7.3 Hz, 1H), 5.06 (s, 2H), 4.87 (s, 1H), 3.98 (s, 3H), 3.55 – 3.40 (m, 2H), 3.13 – 2.96 (m, 2H).

**<sup>13</sup>C NMR (101 MHz, CDCl<sub>3</sub>)** δ 168.99, 157.01, 136.46, 135.93, 135.84, 133.53, 131.53, 128.93, 128.68(2C), 128.28, 128.02(2C), 127.14, 123.46, 121.88, 120.61, 120.16, 119.81, 119.69, 114.22, 111.13, 110.25, 107.33, 66.88, 52.25, 41.01, 27.45.

**HRMS (ESI):** calcd for C<sub>28</sub>H<sub>26</sub>N<sub>3</sub>O<sub>4</sub> [M + H]<sup>+</sup>*m/z* 468.1918, found 468.1920.



## Compound 21

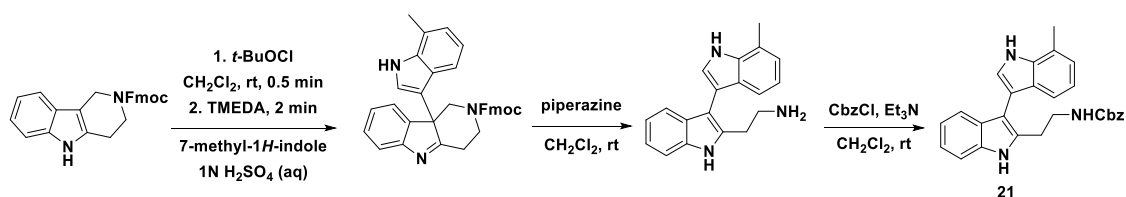

### ***Benzyl (2-(7'-methyl-1*H*,1'*H*-[3,3'-biindol]-2-yl)ethyl)carbamate***

To a solution of (9*H*-fluoren-9-yl)methyl 1,3,4,5-tetrahydro-2*H*-pyrido[4,3-*b*]indole-2-carboxylate (394 mg, 1.0 mmol) in CH<sub>2</sub>Cl<sub>2</sub> (8 mL) was added *tert*-butyl hypochlorite (130 mg, 1.2 mmol). The solution was stirred at rt for 0.5 min and then TMEDA (116 mg, 1.0 mmol) was added. The solution was stirred at rt for 2 min. Then 7-methyl-1*H*-indole (196 mg, 1.5 mmol) and 1 N H<sub>2</sub>SO<sub>4</sub> solution (1.0 mL, 1.0 mmol) were added into the mixture. The solution was stirred at rt for 6 h. The resulting mixture was diluted with CH<sub>2</sub>Cl<sub>2</sub> (40 mL) and then was washed with H<sub>2</sub>O (60 mL). The organic layer was dried over anhydrous Na<sub>2</sub>SO<sub>4</sub>, filtered, and then concentrated to dryness under vacuum to give the crude product. To a solution of this crude product in CH<sub>2</sub>Cl<sub>2</sub> (5 mL) was added piperazine (331 mg). The mixture was stirred at rt for 12 h. The resulting solution was diluted with CH<sub>2</sub>Cl<sub>2</sub> (20 mL) and then was washed with H<sub>2</sub>O (100 mL). The organic layer was dried over anhydrous Na<sub>2</sub>SO<sub>4</sub>, filtered, and then concentrated to dryness under vacuum. The residue was purified by silica gel column chromatography (CH<sub>2</sub>Cl<sub>2</sub>/MeOH/NH<sub>3</sub>•H<sub>2</sub>O = 100:10:1) to give primary amine. To a solution of this primary amine in CH<sub>2</sub>Cl<sub>2</sub> (5 mL) was added CbzCl (341 mg, 2 mmol) and Et<sub>3</sub>N (202 mg, 2 mmol). The mixture was stirred at rt for 20 min. The resulting solution was purified by silica gel column chromatography (CH<sub>2</sub>Cl<sub>2</sub>/EtOAc = 50:1) to give the desired product (169 mg, 40%) as a light yellow solid.

**Physical State:** light yellow solid.

**Melting Point:** 84.4 – 87.5 °C.

**TLC:** R<sub>f</sub> = 0.40 (PE/EtOAc = 2:1).

**<sup>1</sup>H NMR (400 MHz, CDCl<sub>3</sub>)** δ 8.43 (s, 1H), 8.15 (s, 1H), 7.51 (d, *J* = 7.8 Hz, 1H), 7.41 – 7.38 (m, 2H), 7.37 – 7.35 (m, 2H), 7.34 – 7.30 (m, 2H), 7.29 (s, 1H), 7.22 (t, *J* = 7.1 Hz, 2H), 7.11 (d, *J* = 7.8 Hz, 1H), 7.06 (d, *J* = 8.1 Hz, 2H), 5.08 (s, 2H), 4.84 (s, 1H), 3.52 – 3.39 (m, 2H), 3.13 – 2.95 (m, 2H), 2.58 (s, 3H).

**<sup>13</sup>C NMR (101 MHz, CDCl<sub>3</sub>)** δ 156.69, 136.50, 135.84, 135.70, 132.98, 129.02, 128.62(2C), 128.22, 128.15(2C), 127.38, 122.96, 122.70, 121.69, 120.53, 119.91, 119.81, 119.60, 118.25, 110.80, 110.26, 108.15, 66.78, 40.82, 27.49, 16.68.

**HRMS (ESI):** calcd for C<sub>27</sub>H<sub>26</sub>N<sub>3</sub>O<sub>2</sub> [M + H]<sup>+</sup> *m/z* 424.2020, found 424.2019.

## Compound 22

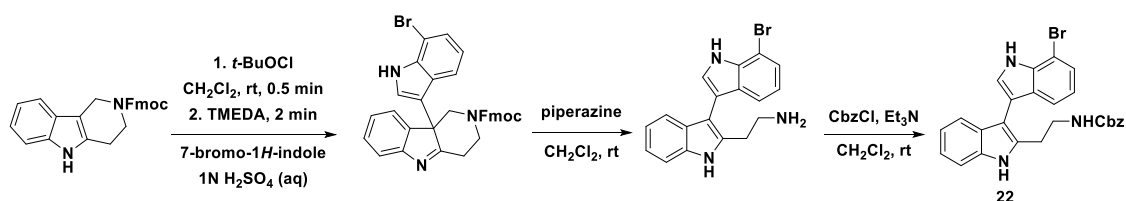

### **Benzyl (2-(7'-bromo-1H,1'H-[3,3'-biindol]-2-yl)ethyl)carbamate**

To a solution of (9H-fluoren-9-yl)methyl 1,3,4,5-tetrahydro-2H-pyrido[4,3-b]indole-2-carboxylate (394 mg, 1.0 mmol) in CH<sub>2</sub>Cl<sub>2</sub> (8 mL) was added *tert*-butyl hypochlorite (130 mg, 1.2 mmol). The solution was stirred at rt for 0.5 min and then TMEDA (116 mg, 1.0 mmol) was added. The solution was stirred at rt for 2 min. Then 7-bromo-1H-indole (294 mg, 1.5 mmol) and 1 N H<sub>2</sub>SO<sub>4</sub> solution (1.0 mL, 1.0 mmol) were added into the mixture. The solution was stirred at rt for 10 h. The resulting mixture was diluted with CH<sub>2</sub>Cl<sub>2</sub> (40 mL) and then was washed with H<sub>2</sub>O (60 mL). The organic layer was dried over anhydrous Na<sub>2</sub>SO<sub>4</sub>, filtered, and then concentrated to dryness under vacuum to give the crude product. To a solution of this crude product in CH<sub>2</sub>Cl<sub>2</sub> (5 mL) was added piperazine (331 mg). The mixture was stirred at rt for 12 h. The resulting solution was diluted with CH<sub>2</sub>Cl<sub>2</sub> (40 mL) and then was washed with H<sub>2</sub>O (100 mL). The organic layer was dried over anhydrous Na<sub>2</sub>SO<sub>4</sub>, filtered, and then concentrated to dryness under vacuum. The residue was purified by silica gel column chromatography (CH<sub>2</sub>Cl<sub>2</sub>/MeOH/NH<sub>3</sub>•H<sub>2</sub>O = 100:10:1) to give primary amine. To a solution of this primary amine in CH<sub>2</sub>Cl<sub>2</sub> (5 mL) was added CbzCl (341 mg, 2 mmol) and Et<sub>3</sub>N (202 mg, 2 mmol). The mixture was stirred at rt for 20 min. The resulting solution was purified by silica gel column chromatography (CH<sub>2</sub>Cl<sub>2</sub>/EtOAc = 50:1) to give the desired product (342 mg, 70%) as a light yellow solid.

**Physical State:** light yellow solid.

**Melting Point:** 70.1 – 70.9 °C.

**TLC:** R<sub>f</sub> = 0.40 (PE/EtOAc = 2:1).

**<sup>1</sup>H NMR (400 MHz, CDCl<sub>3</sub>)** δ 8.54 (s, 1H), 8.40 (s, 1H), 7.49 – 7.43 (m, 2H), 7.41 (d, *J* = 7.6 Hz, 2H), 7.38 (d, *J* = 5.5 Hz, 3H), 7.35 – 7.31 (m, 2H), 7.25 (d, *J* = 4.8 Hz, 1H), 7.22 (d, *J* = 7.5 Hz, 1H), 7.11 (t, *J* = 7.3 Hz, 1H), 6.99 (t, *J* = 7.7 Hz, 1H), 5.08 (s, 2H), 4.84 (s, 1H), 3.58 – 3.36 (m, 2H), 3.14 – 2.92 (m, 2H).

**<sup>13</sup>C NMR (101 MHz, CDCl<sub>3</sub>)** δ 156.92, 136.52, 135.84, 135.06, 133.46, 129.24, 128.94, 128.77(2C), 128.41, 128.24(2C), 128.17, 124.63, 124.02, 121.95, 120.99, 119.88, 119.77, 111.15, 111.08, 107.61, 105.02, 66.96, 40.96, 27.47.

**HRMS (ESI):** calcd for C<sub>26</sub>H<sub>23</sub>BrN<sub>3</sub>O<sub>2</sub> [M + H]<sup>+</sup>*m/z* 488.0968, found 488.0917.

## Compound 23

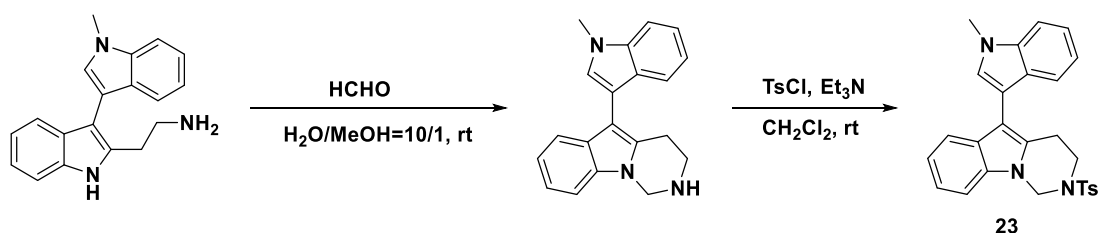

### **5-(1-Methyl-1H-indol-3-yl)-2-tosyl-1,2,3,4-tetrahydropyrimido[1,6-a]indole**

To a solution of 2-(1'-methyl-1H,1'H-[3,3'-biindol]-2-yl)ethan-1-amine (145 mg, 0.5 mmol) in H<sub>2</sub>O/MeOH=10/1 (5.5 mL) was added 36% formaldehyde solution (50 mg, 0.6 mmol) and AcOH (0.5 mL). The solution was stirred at rt for 24 h. The resulting solution was filtered to give the crude product as pale yellow solid. To a solution of the crude product in CH<sub>2</sub>Cl<sub>2</sub> (20 mL) was added TsCl (190 mg, 1 mmol) and Et<sub>3</sub>N (101 mg, 1 mmol). The mixture was stirred at rt for 20 min. The resulting solution was purified by silica gel column chromatography (PE/EtOAc = 4:1) to give the desired product (85 mg, 37%) as a white solid.

**Physical State:** white solid.

**Melting Point:** 170.2 – 176.3 °C.

**TLC:** R<sub>f</sub> = 0.51 (PE/EtOAc = 2:1).

**<sup>1</sup>H NMR (400 MHz, CDCl<sub>3</sub>)** δ 7.68 (d, *J* = 8.0 Hz, 2H), 7.56 (d, *J* = 7.9 Hz, 1H), 7.40 (t, *J* = 7.3 Hz, 2H), 7.30 (d, *J* = 7.3 Hz, 1H), 7.29 – 7.24 (m, 2H), 7.21 (d, *J* = 8.0 Hz, 2H), 7.15 (t, *J* = 7.5 Hz, 1H), 7.09 (t, *J* = 7.4 Hz, 1H), 6.99 (s, 1H), 5.64 (s, 2H), 3.88 (s, 3H), 3.72 (t, *J* = 6.3 Hz, 2H), 2.88 (t, *J* = 6.3 Hz, 2H), 2.38 (s, 3H).

**<sup>13</sup>C NMR (101 MHz, CDCl<sub>3</sub>)** δ 144.11, 137.00, 135.80, 134.77, 129.86(2C), 129.66, 128.48, 127.71, 127.30(2C), 127.27, 121.75, 121.50, 120.49, 120.27, 119.89, 119.08, 109.42, 108.48, 107.72, 106.99, 57.92, 42.93, 32.90, 22.15, 21.56.

**HRMS (ESI):** calcd for C<sub>27</sub>H<sub>26</sub>N<sub>3</sub>O<sub>2</sub>S [M + H]<sup>+</sup>*m/z* 456.1740, found 456.1741.

## Compound 24

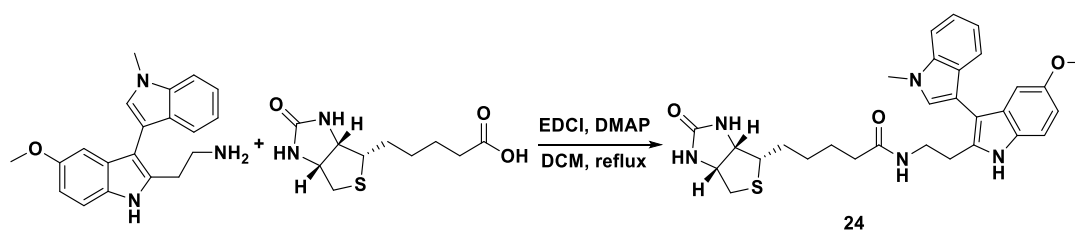

### *N*-(2-(5-methoxy-1'-methyl-1H,1'H-[3,3'-biindol]-2-yl)ethyl)-5-((3*a*S,4*S*,6*a*R)-2-oxohexahydro-1H-thieno[3,4-d]imidazol-4-yl)pentanamide

To a solution of 2-(5-methoxy-1'-methyl-1H,1'H-[3,3'-biindol]-2-yl)ethan-1-amine (160 mg, 0.5 mmol) in CH<sub>2</sub>Cl<sub>2</sub> (4 mL) was added biotin (146 mg, 0.6 mmol). The solution was stirred at 50 °C for 6 h. The resulting mixture was diluted with CH<sub>2</sub>Cl<sub>2</sub> (40 mL) and then was washed with H<sub>2</sub>O (60 mL). The organic layer was dried over anhydrous Na<sub>2</sub>SO<sub>4</sub>, filtered, and then concentrated to dryness under vacuum. The residue was purified by silica gel column chromatography (CH<sub>2</sub>Cl<sub>2</sub>/MeOH/NH<sub>3</sub>•H<sub>2</sub>O = 100:10:1) the desired product (147 mg, 54%) as a white solid.

**Physical State:** white solid

**Melting Point:** 135.9 – 141.3 °C.

**TLC:** R<sub>f</sub> = 0.43 (CH<sub>2</sub>Cl<sub>2</sub>/MeOH = 10:1).

**<sup>1</sup>H NMR (500 MHz, CDCl<sub>3</sub>)** δ 9.52 (s, 1H), 7.47 (d, *J* = 7.9 Hz, 1H), 7.37 (d, *J* = 8.3 Hz, 1H), 7.25 (s, 1H), 7.09 – 7.05 (m, 2H), 6.91 (d, *J* = 2.2 Hz, 1H), 6.78 (dd, *J* = 8.7, 2.4 Hz, 1H), 6.65 (s, 1H), 6.34 (t, *J* = 5.6 Hz, 1H), 4.27 – 4.23 (m, 1H), 4.06 – 4.02 (m, 1H), 3.83 (s, 3H), 3.69 (s, 3H), 3.56 – 3.33 (m, 3H), 2.98 (t, *J* = 6.5 Hz, 2H), 2.90 – 2.86 (m, 1H), 2.73 (dd, *J* = 12.8, 4.8 Hz, 1H), 2.52 (d, *J* = 12.8 Hz, 1H), 1.92 (d, *J* = 7.7 Hz, 1H), 1.53 (d, *J* = 8.1 Hz, 1H), 1.48 – 1.42 (m, 3H), 1.22 – 1.17 (m, 2H).

**<sup>13</sup>C NMR (126 MHz, CDCl<sub>3</sub>)** δ 174.11, 153.98, 137.16, 134.56, 130.96, 129.28, 128.22, 127.62, 121.79, 120.63, 119.17, 111.78, 111.43, 109.51, 108.65, 107.19, 101.54, 61.66, 60.24, 55.99, 55.64, 40.48, 39.31, 35.72, 32.93, 27.93, 27.05, 25.59.

**HRMS (ESI):** calcd for C<sub>19</sub>H<sub>20</sub>N<sub>3</sub> [M + H]<sup>+</sup> *m/z* 546.2533, found 546.2513.

## 6. NMR Spectra

### <sup>1</sup>H NMR Spectrum of 2

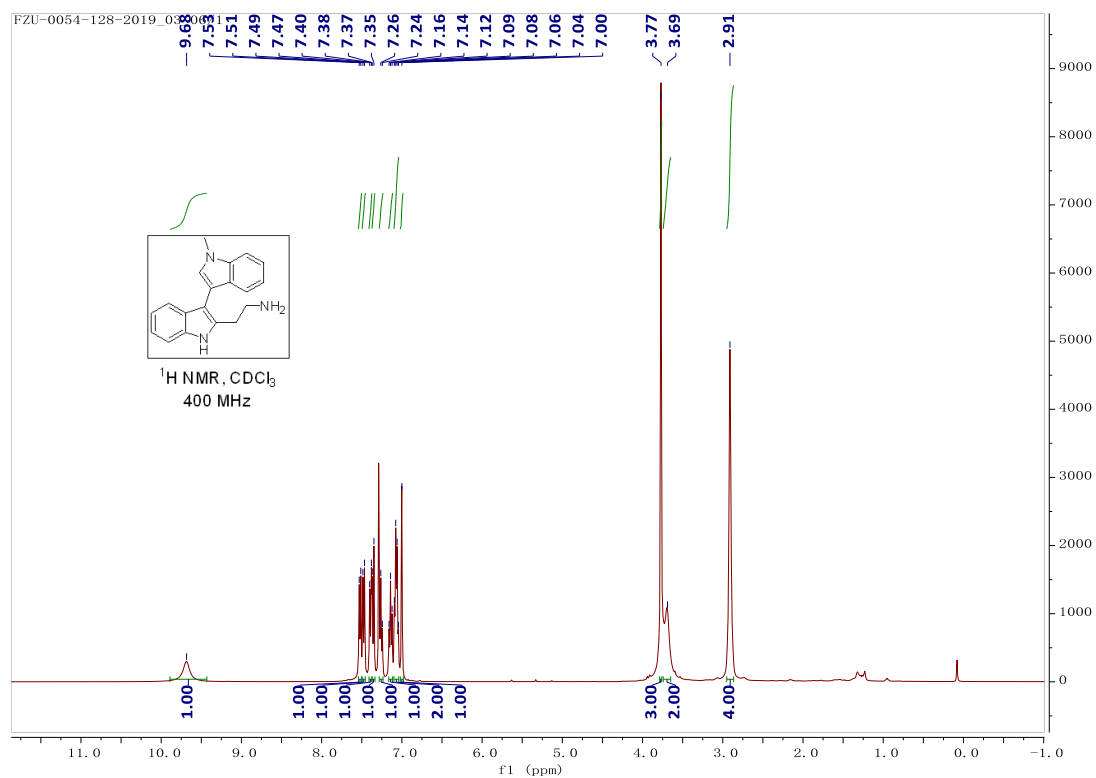

### <sup>13</sup>C NMR Spectrum of 2

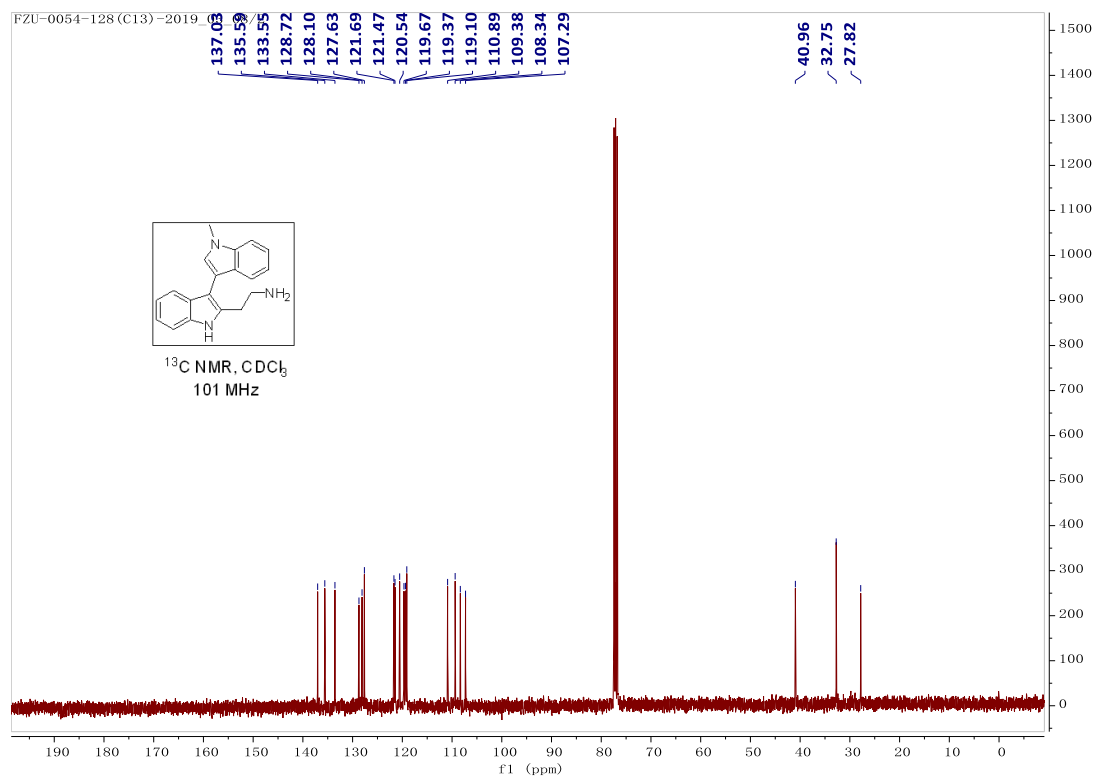

### <sup>1</sup>H NMR Spectrum of 3

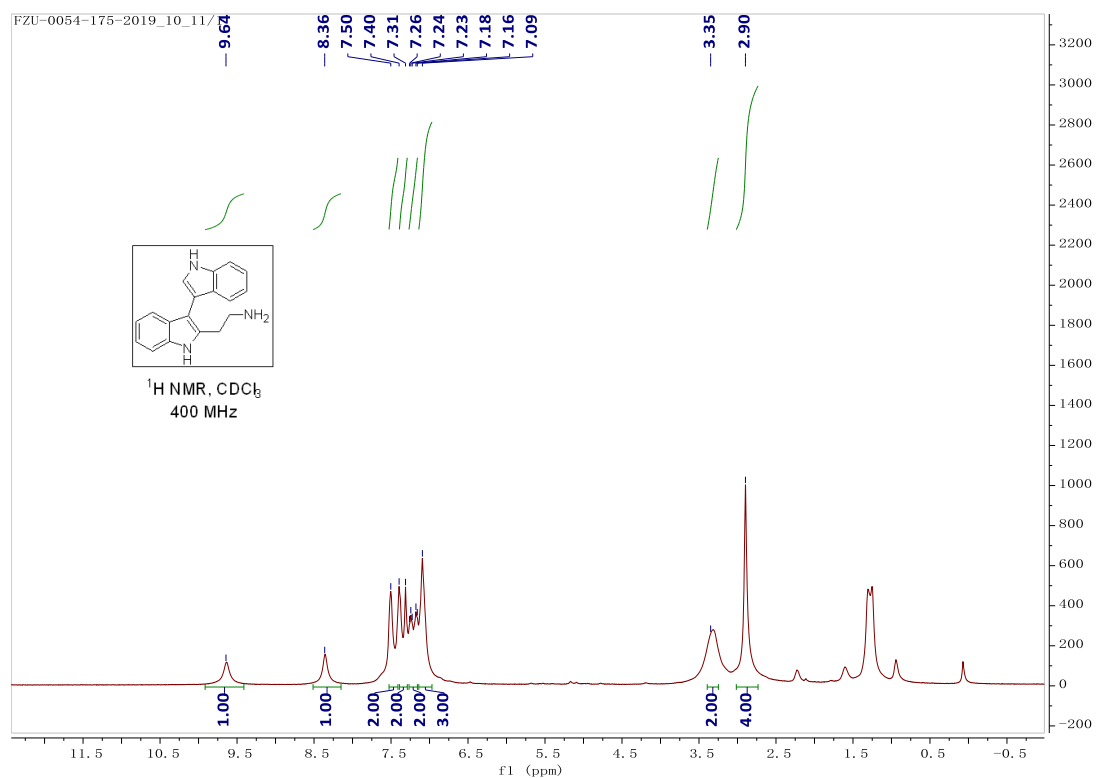

### <sup>13</sup>C NMR Spectrum of 3

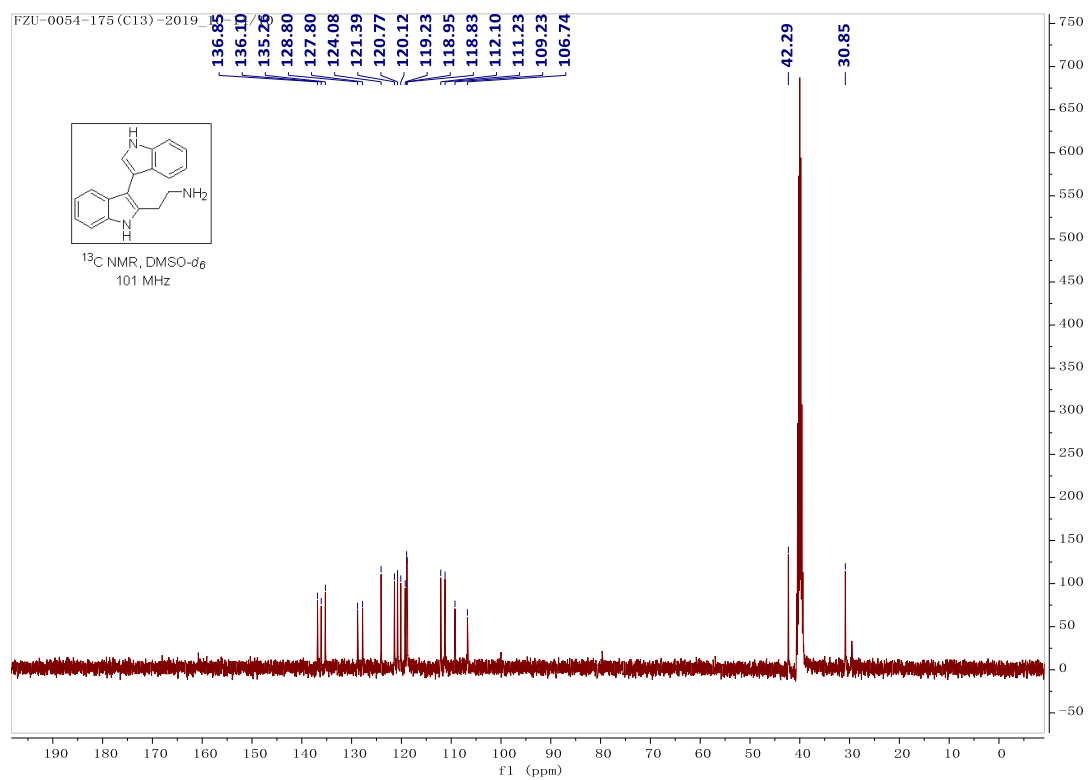

# <sup>13</sup>C NMR Spectrum (dept 135) of 3

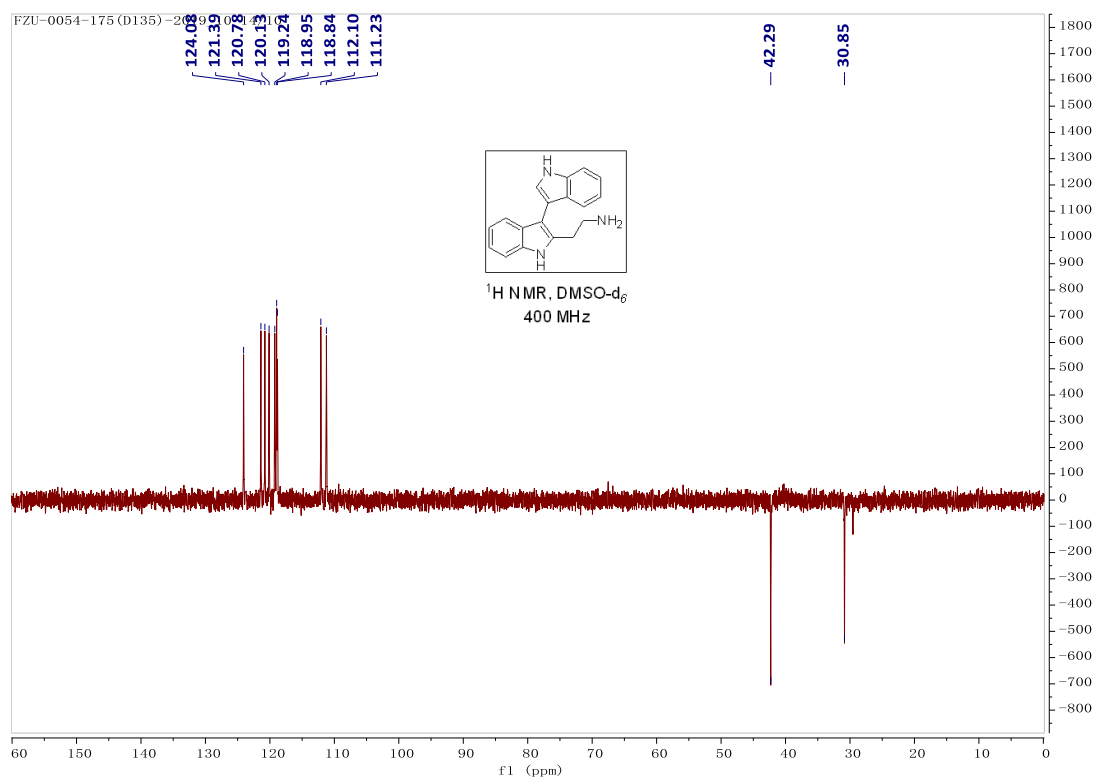

### <sup>1</sup>H NMR Spectrum of 4

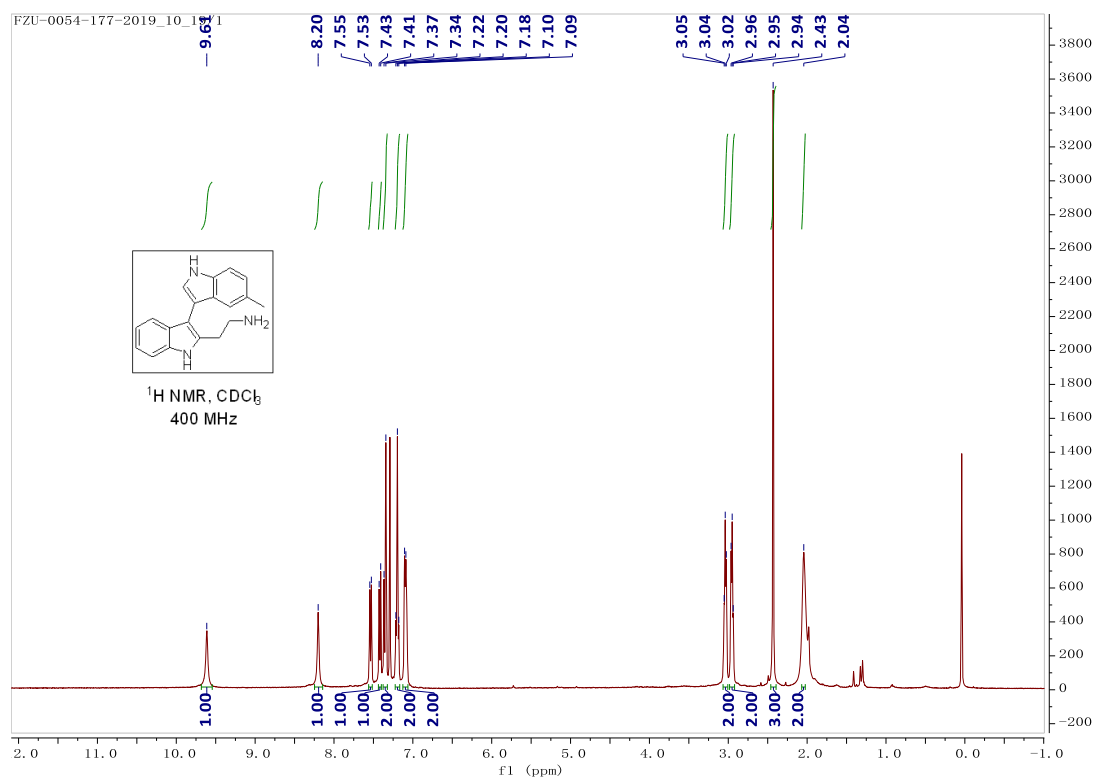

### <sup>13</sup>C NMR Spectrum of 4

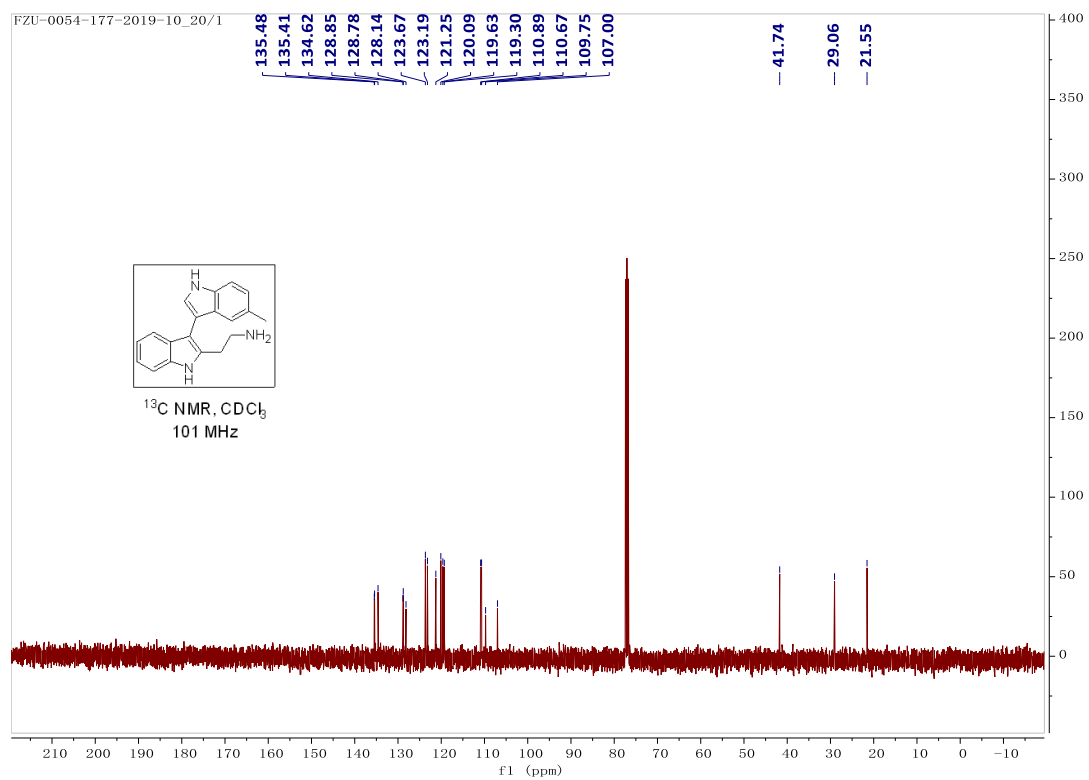



# <sup>13</sup>C NMR Spectrum (dept 135) of 4

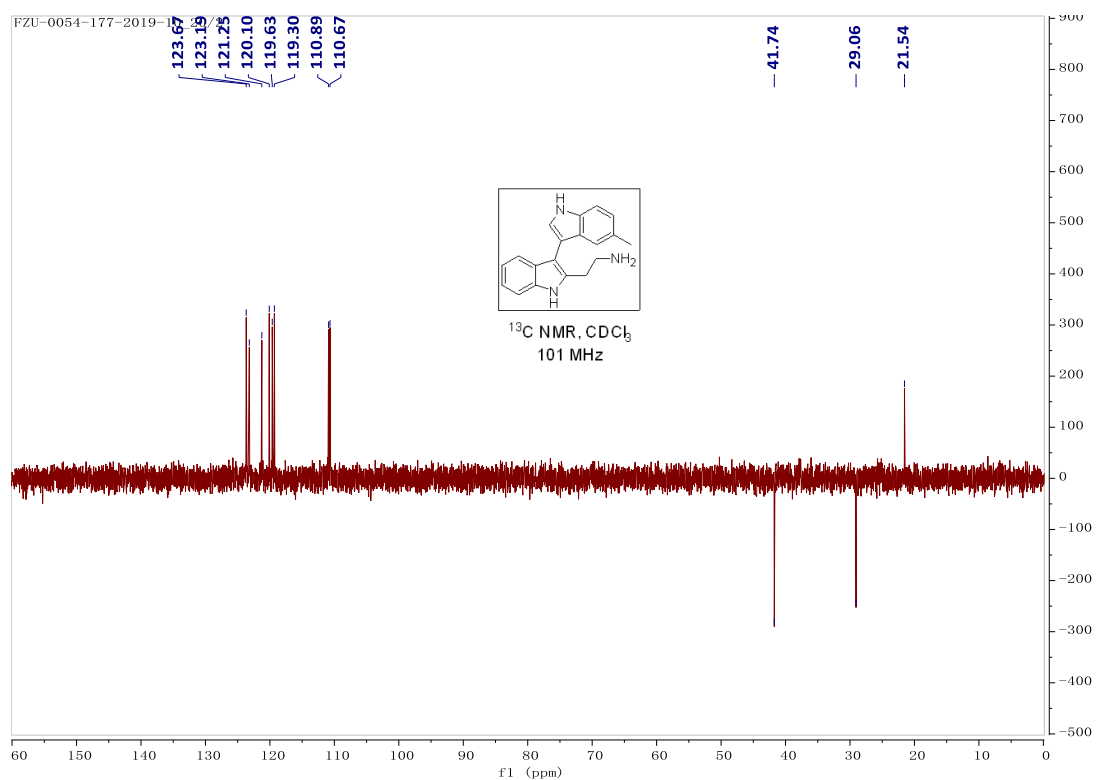

### <sup>1</sup>H NMR Spectrum of 5

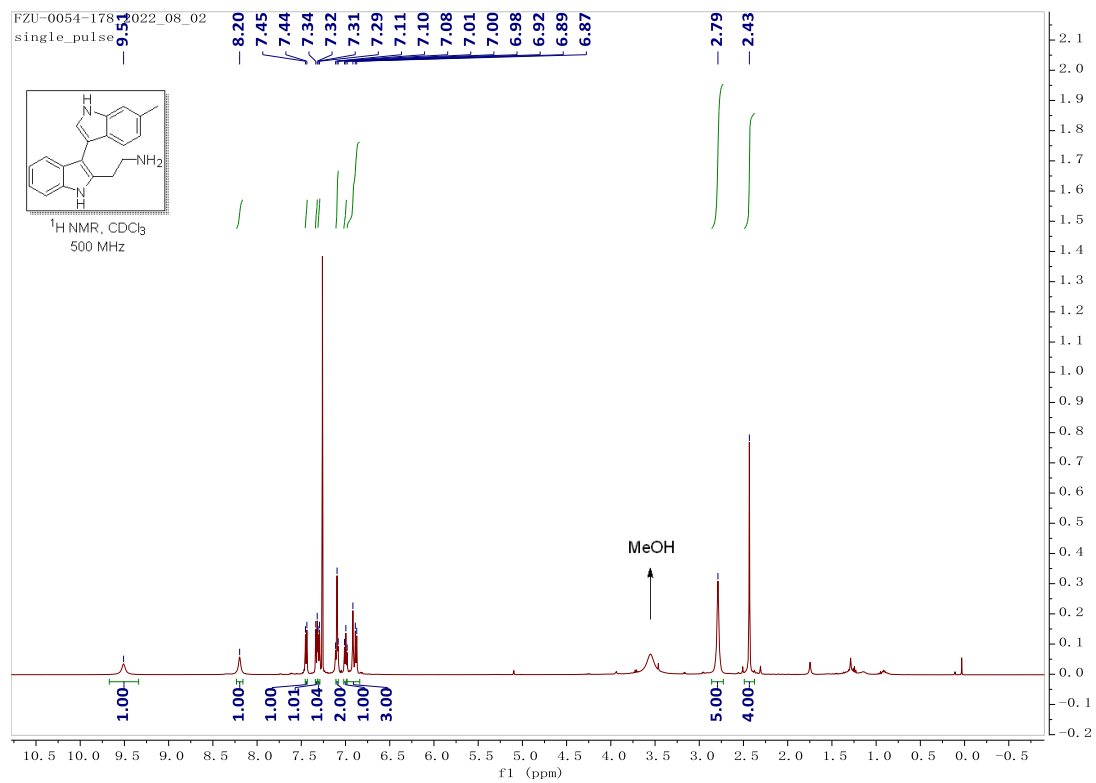

### <sup>13</sup>C NMR Spectrum of 5

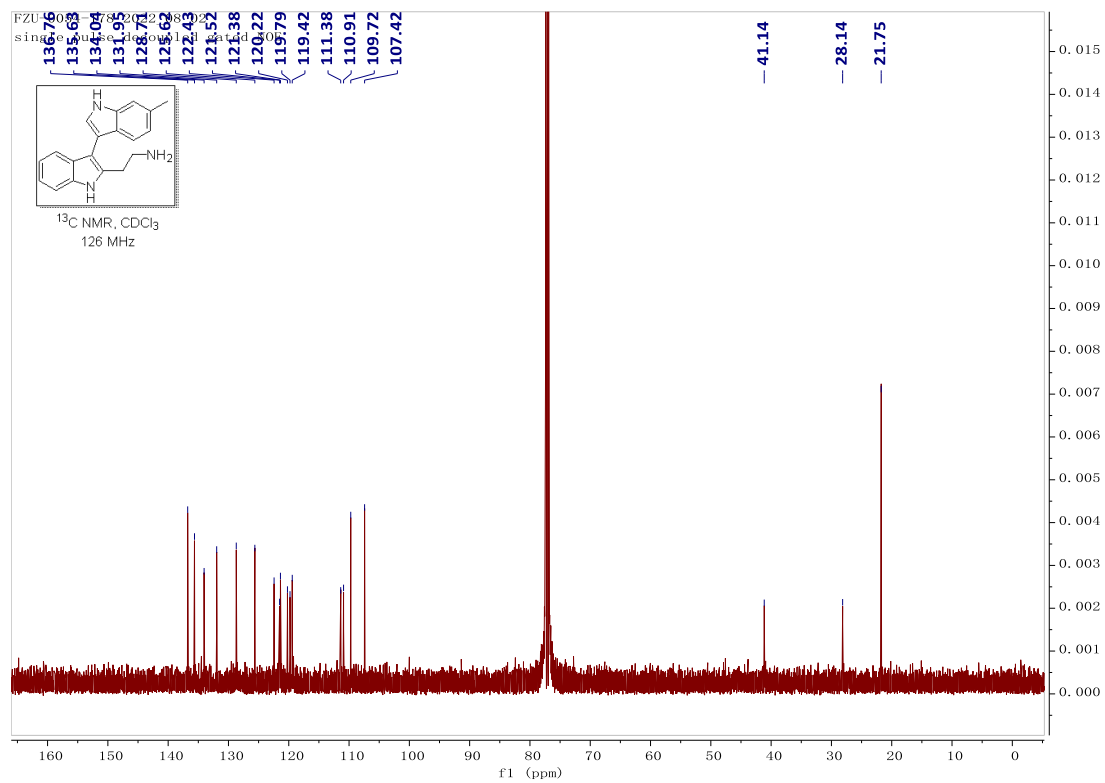

### <sup>1</sup>H NMR Spectrum of 6

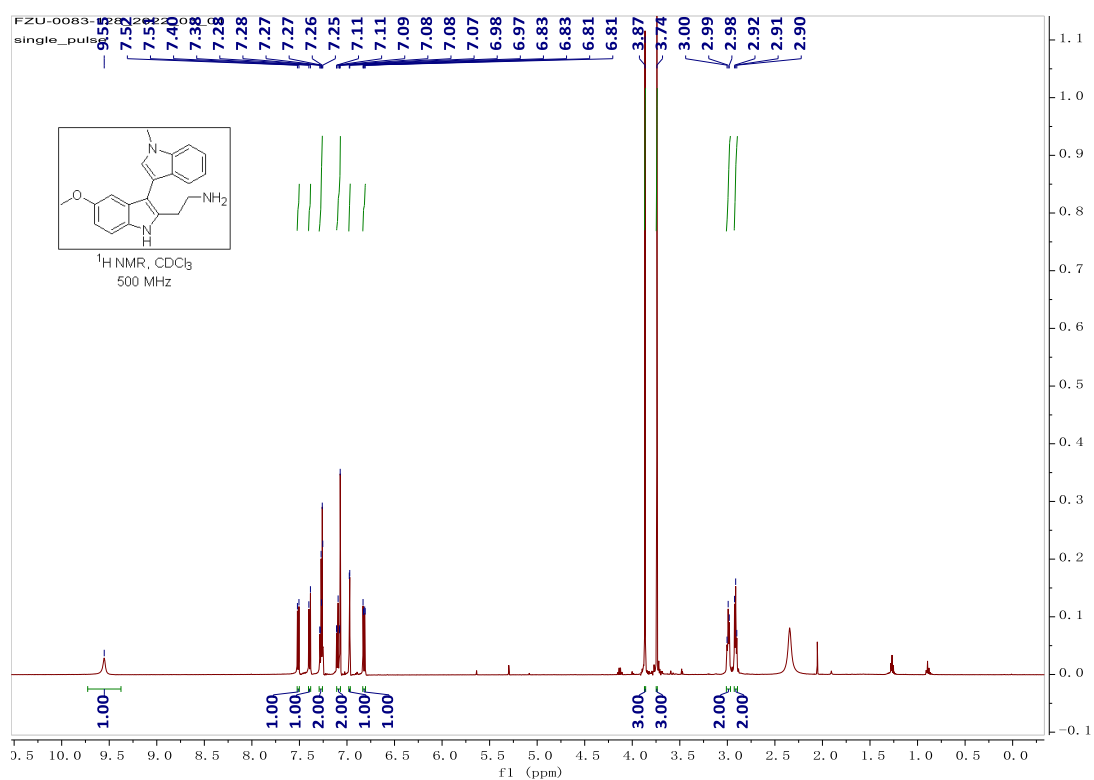

### <sup>13</sup>C NMR Spectrum of 6

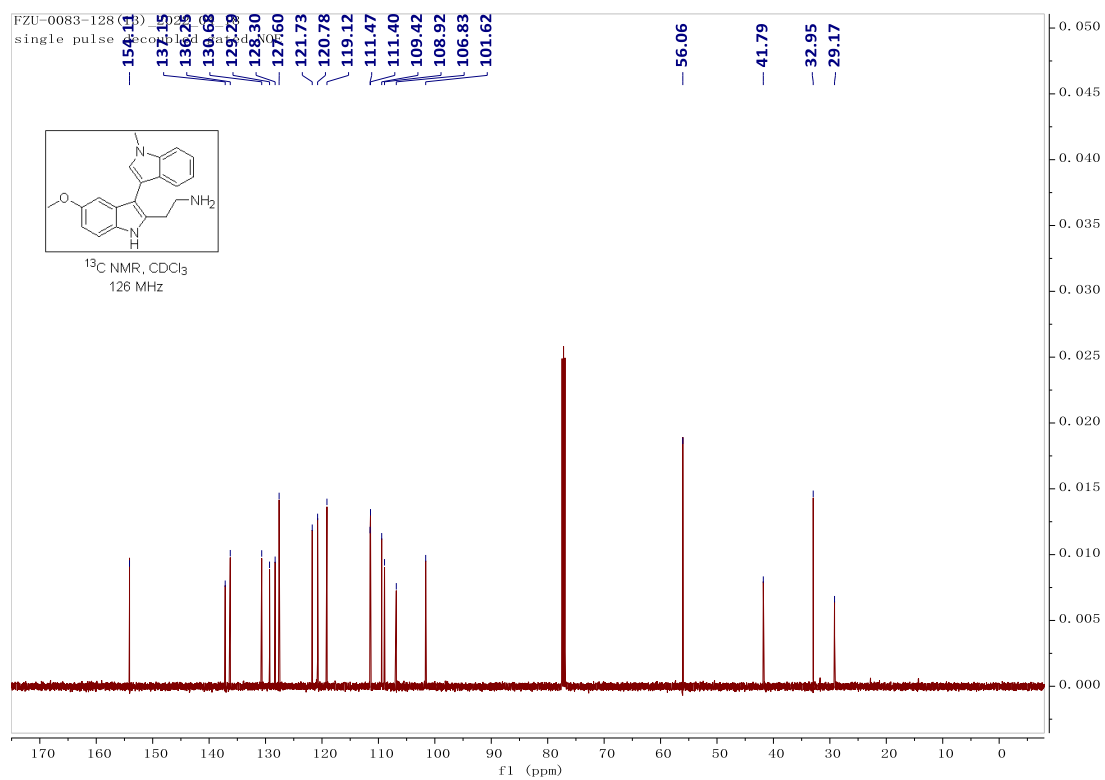

### <sup>1</sup>H NMR Spectrum of 7

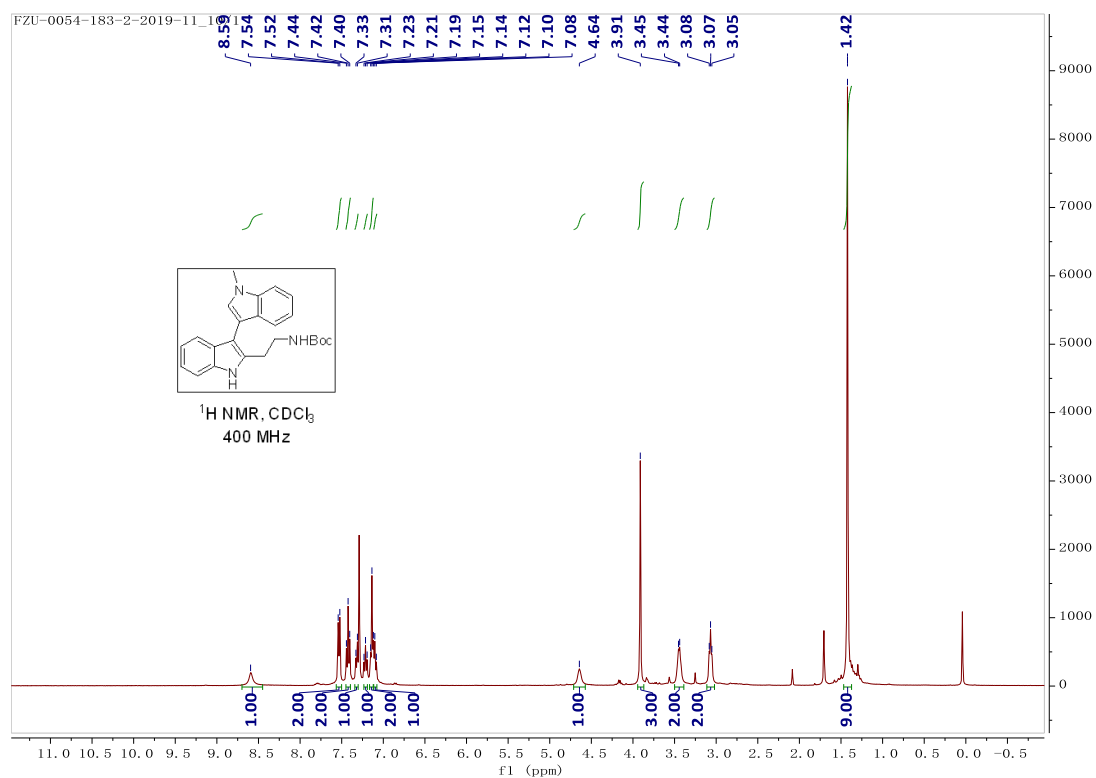

### <sup>13</sup>C NMR Spectrum of 7

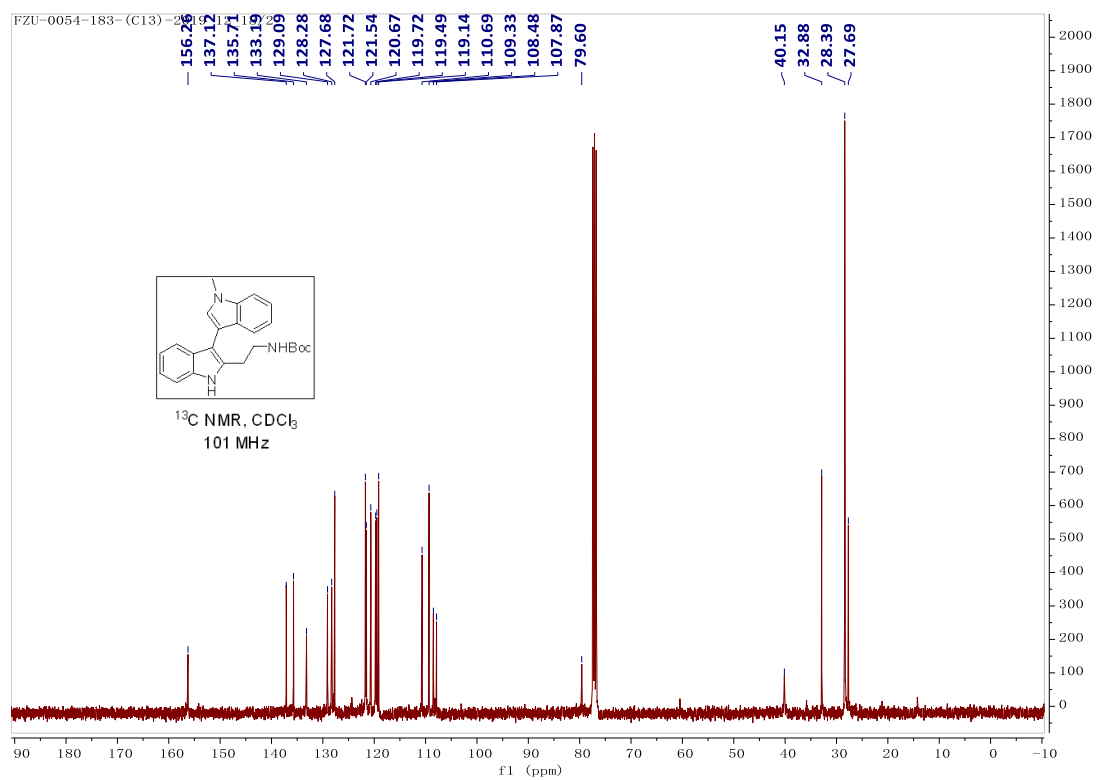

### <sup>1</sup>H NMR Spectrum of 8

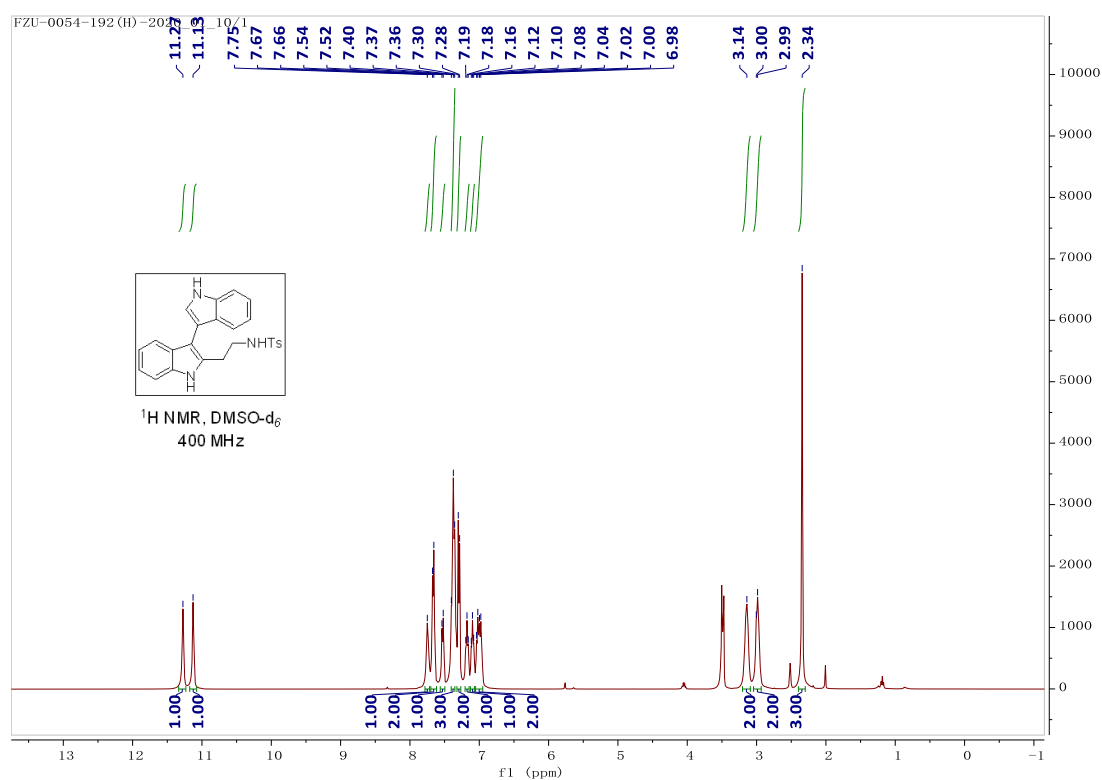

### <sup>13</sup>C NMR Spectrum of 8

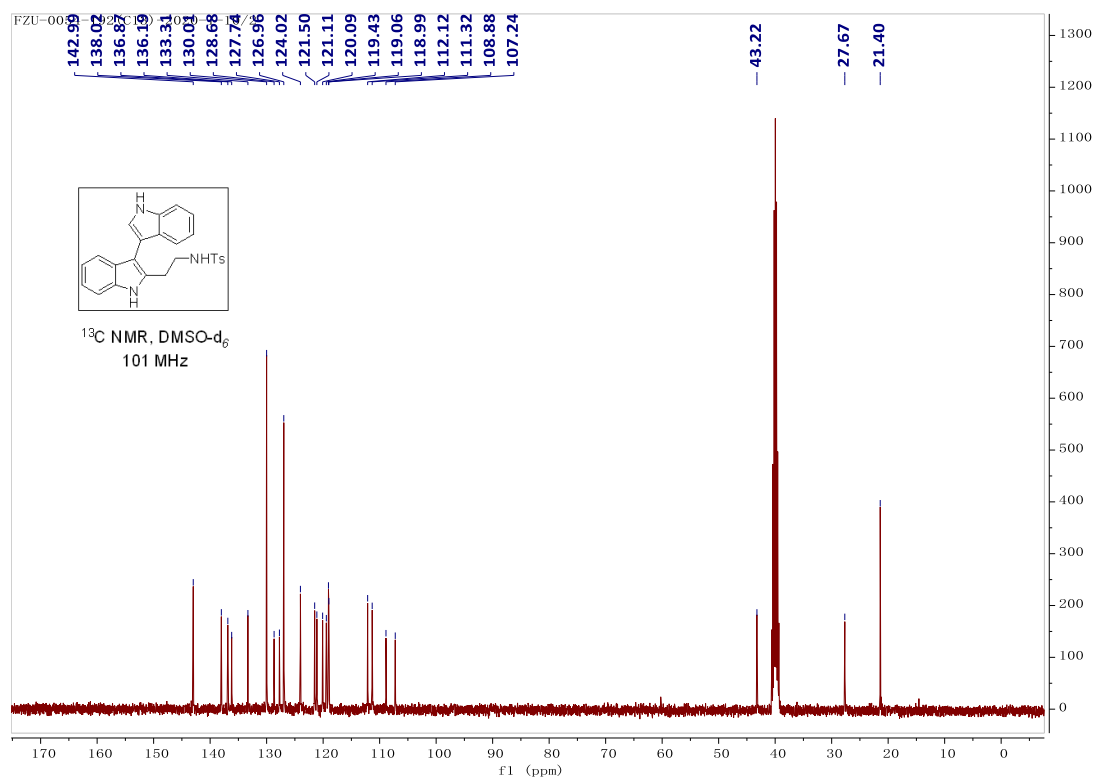

### <sup>1</sup>H NMR Spectrum of 9

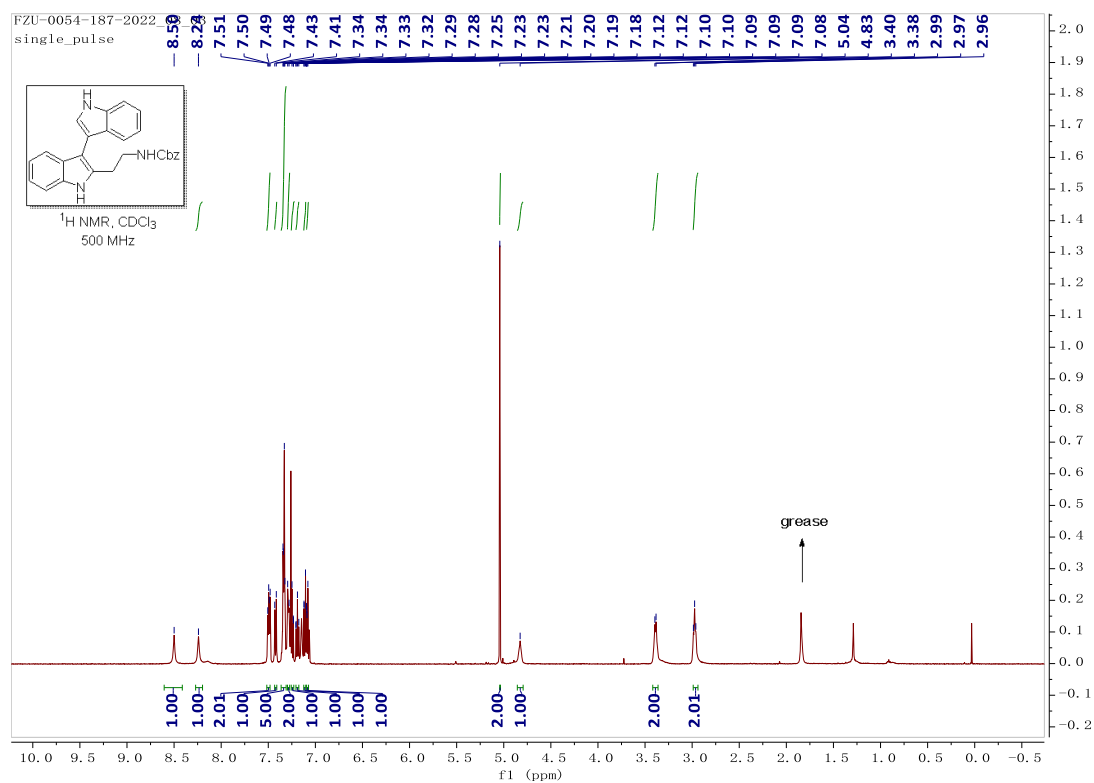

### <sup>13</sup>C NMR Spectrum of 9

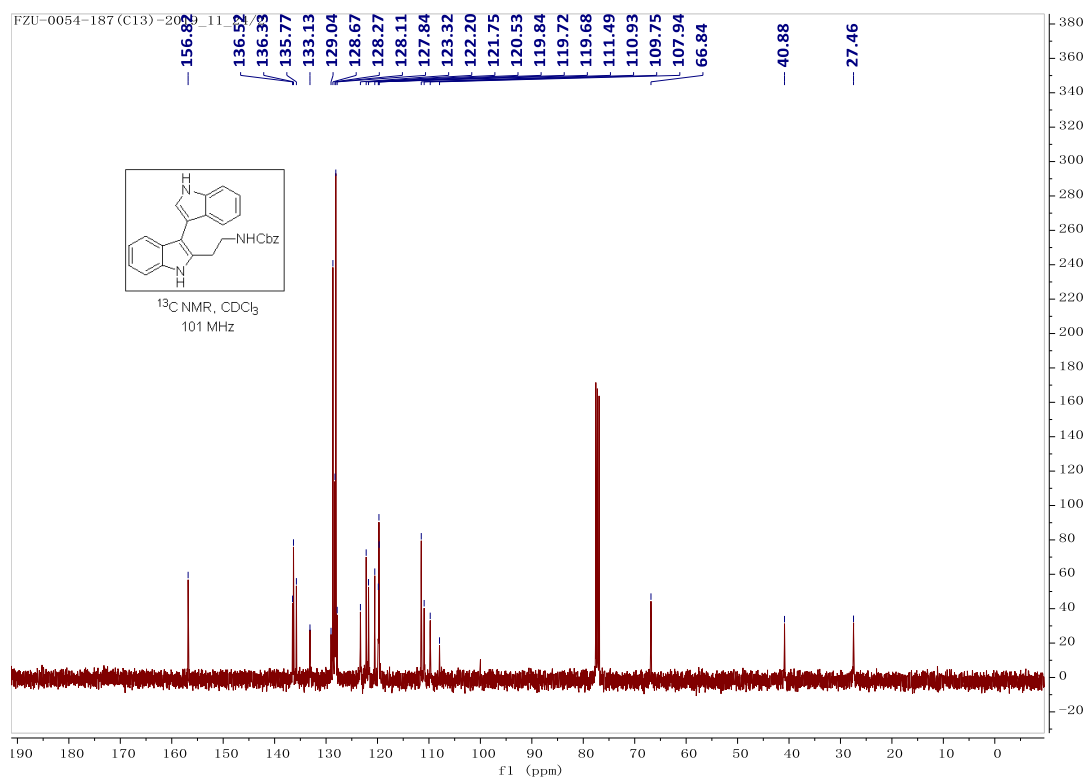

### <sup>1</sup>H NMR Spectrum of 10

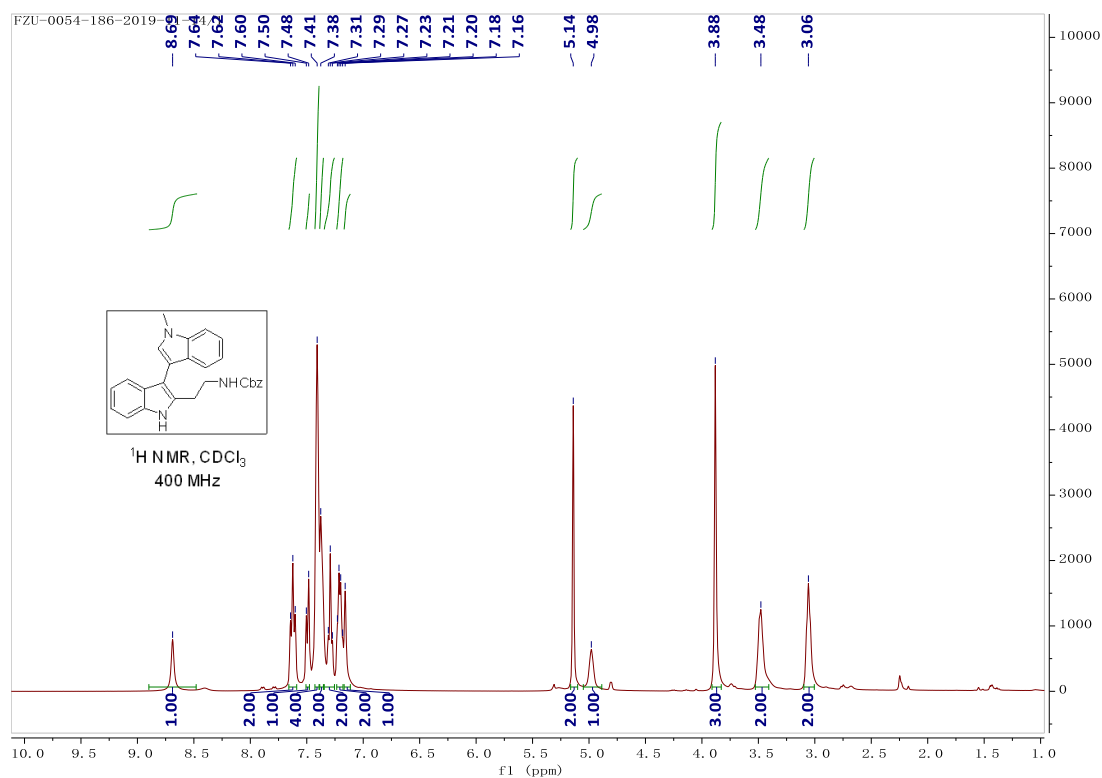

### <sup>13</sup>C NMR Spectrum of 10

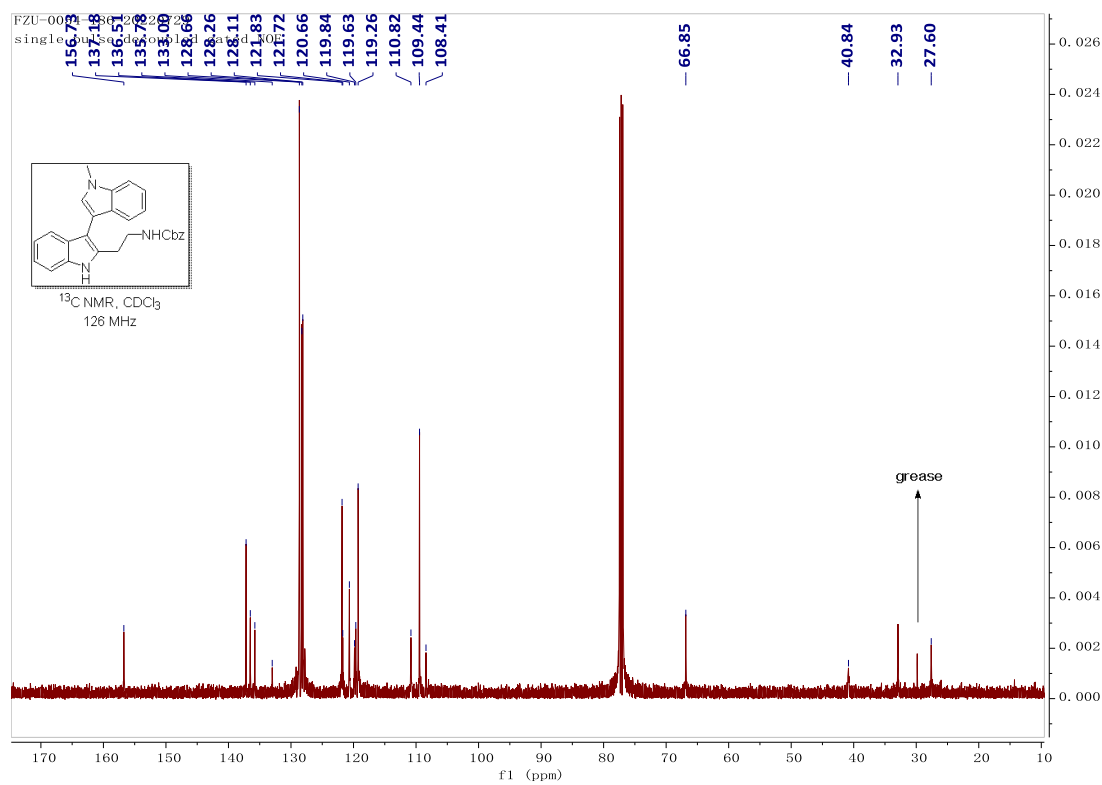

### <sup>1</sup>H NMR Spectrum of 11

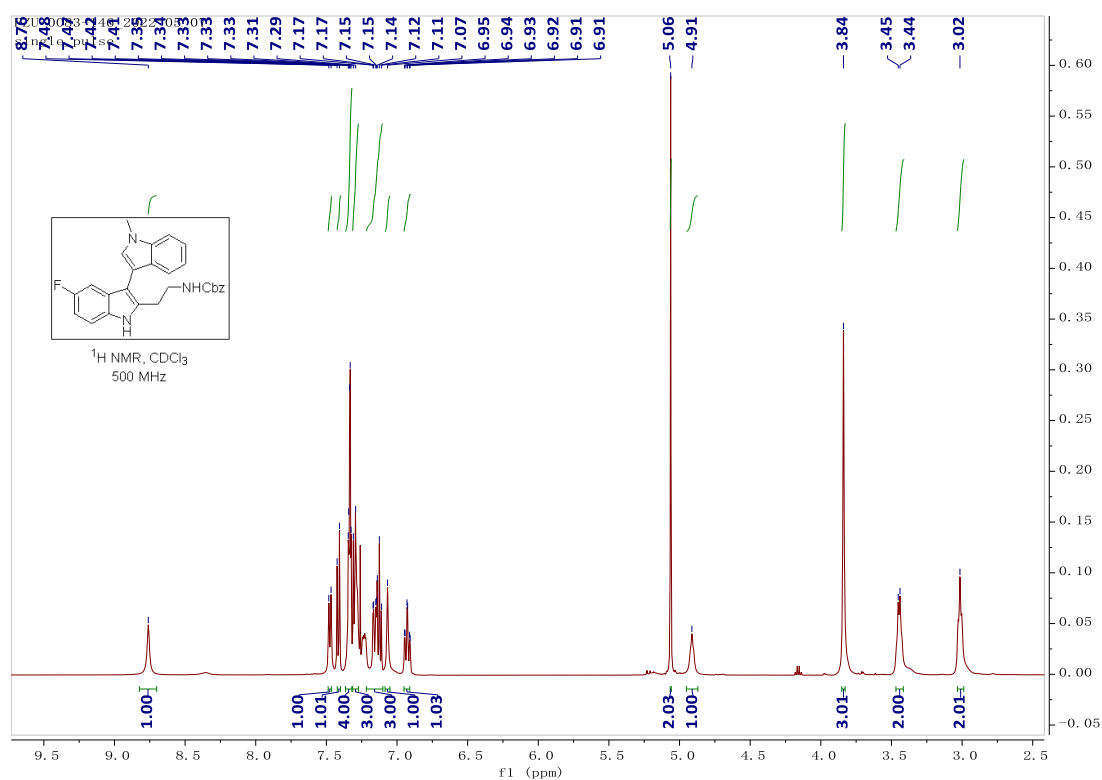

### <sup>13</sup>C NMR Spectrum of 11

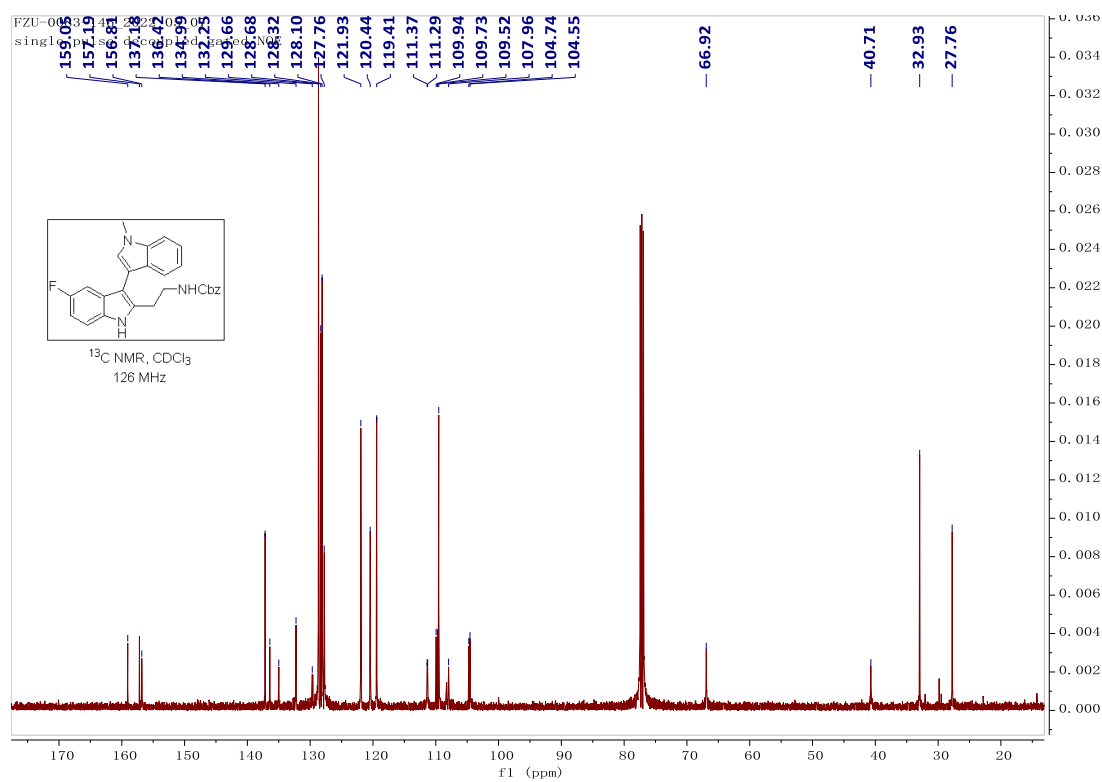



# <sup>19</sup>F NMR Spectrum of 11

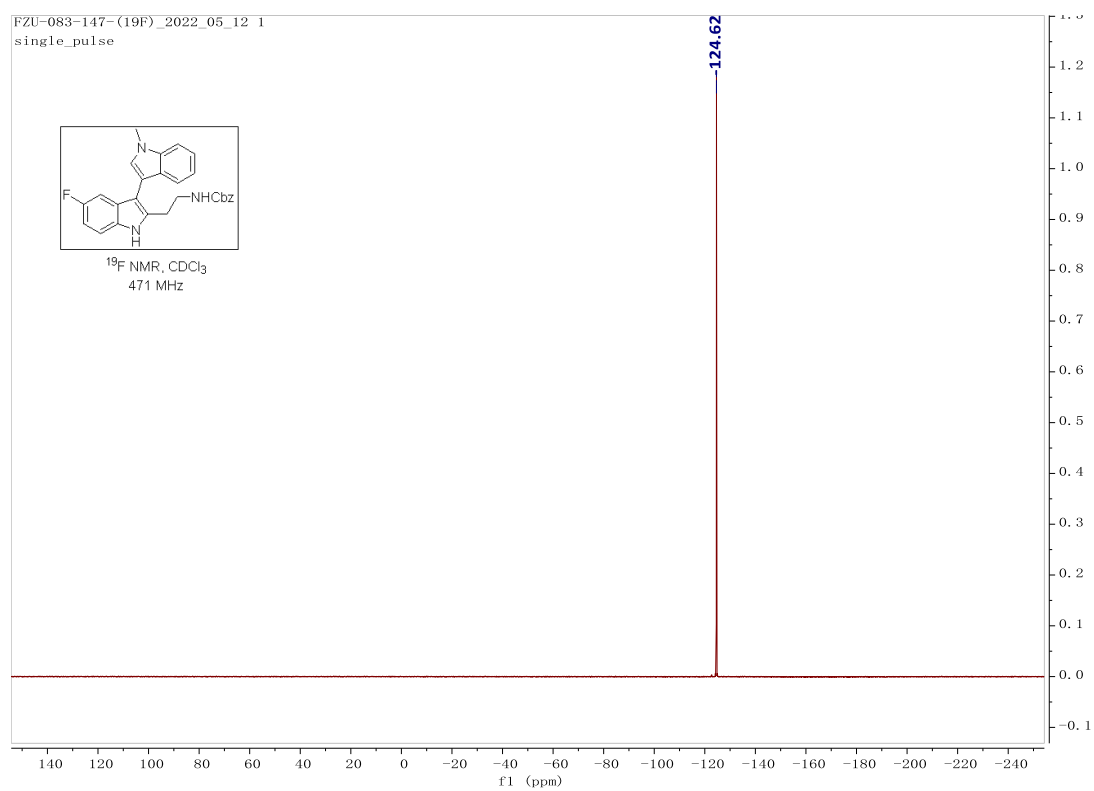

### <sup>1</sup>H NMR Spectrum of 12

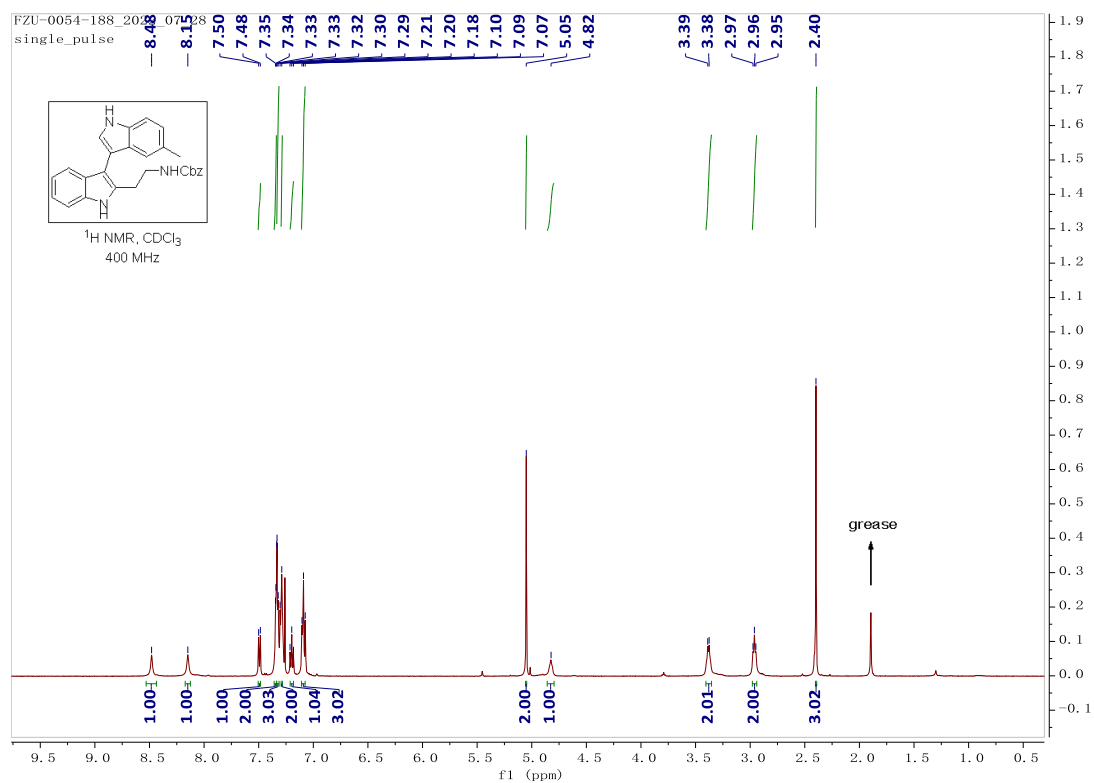

### <sup>13</sup>C NMR Spectrum of 12

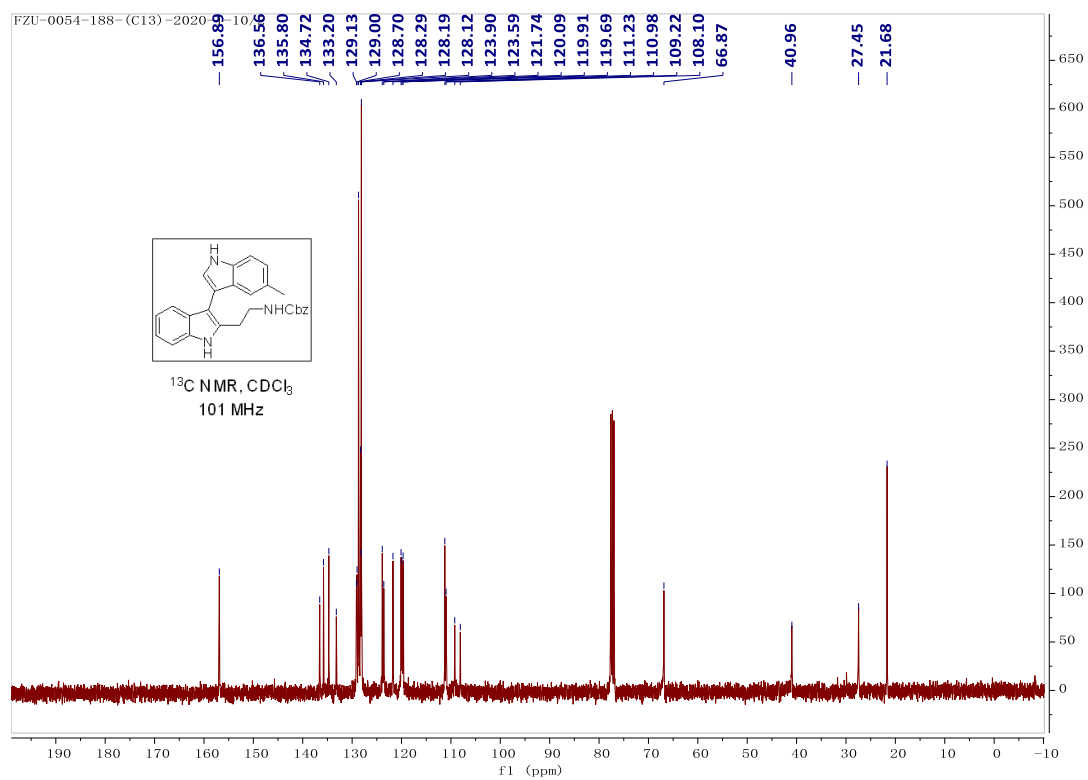

### <sup>1</sup>H NMR Spectrum of 13

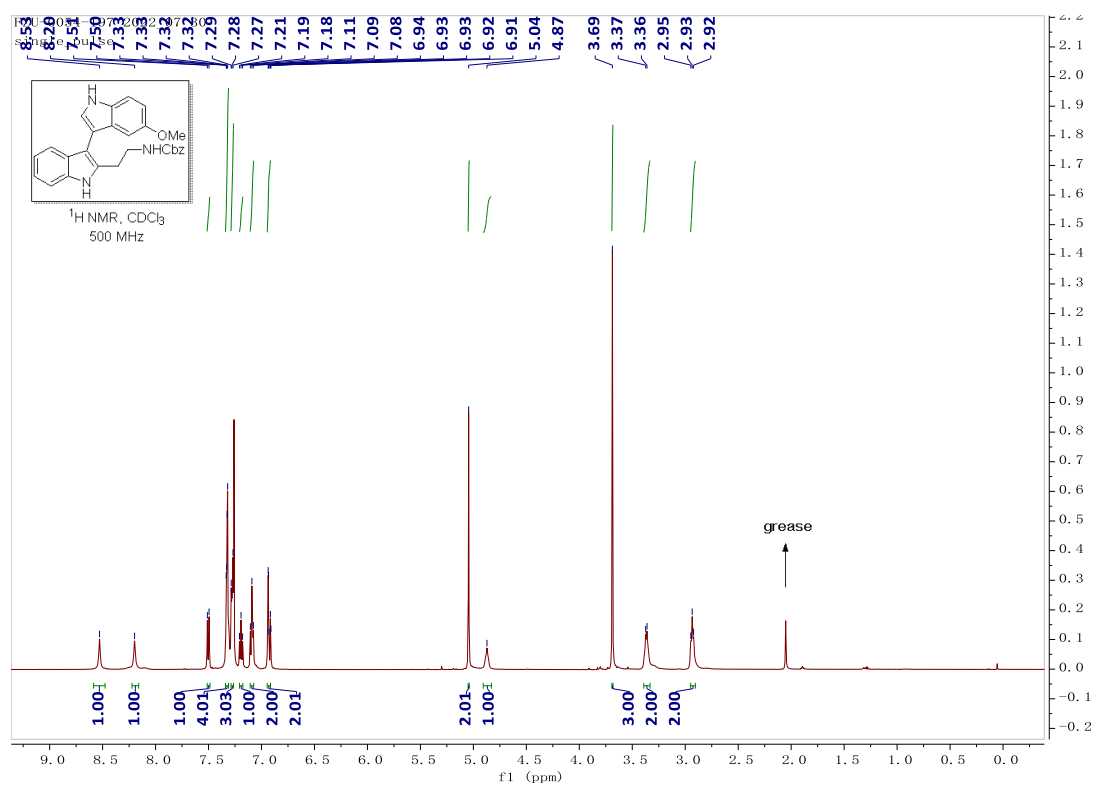

### <sup>13</sup>C NMR Spectrum of 13

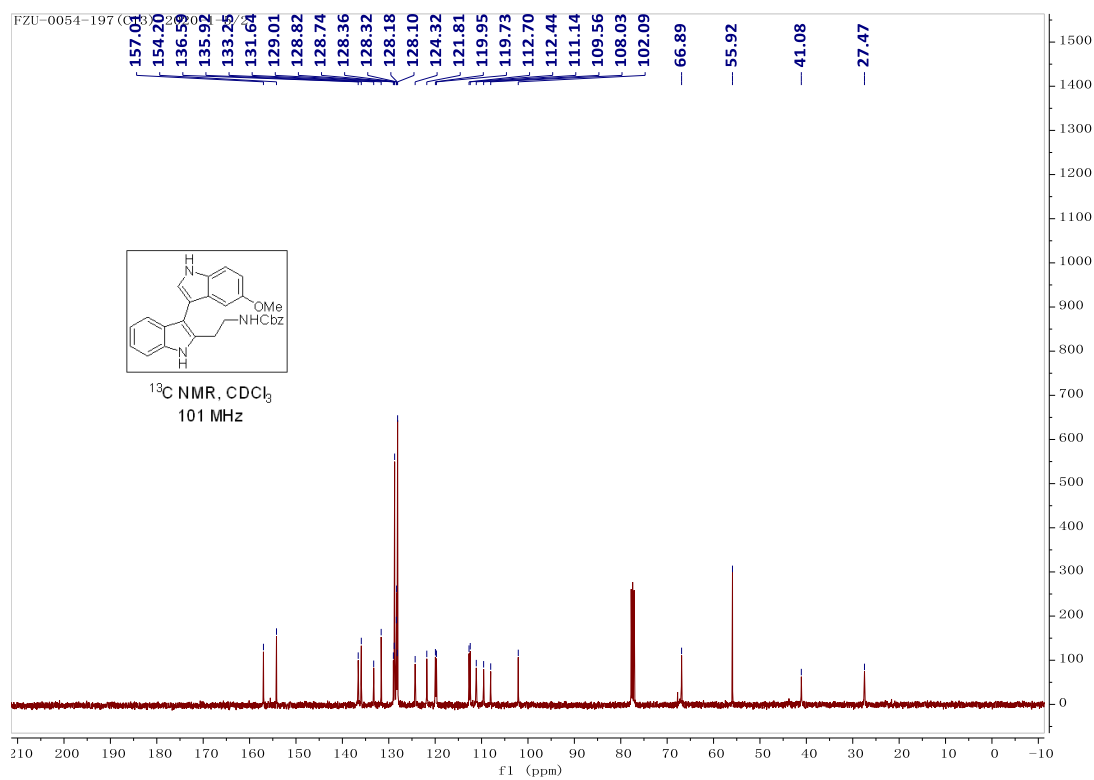

### <sup>1</sup>H NMR Spectrum of 14

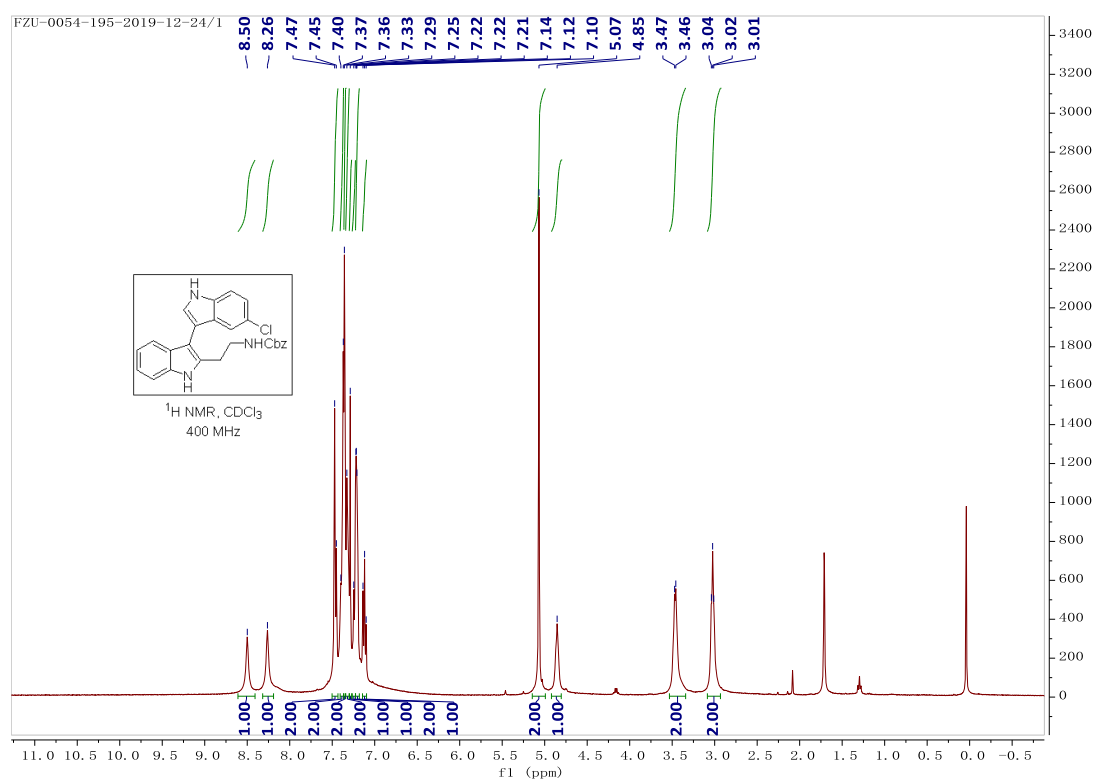

### <sup>13</sup>C NMR Spectrum of 14

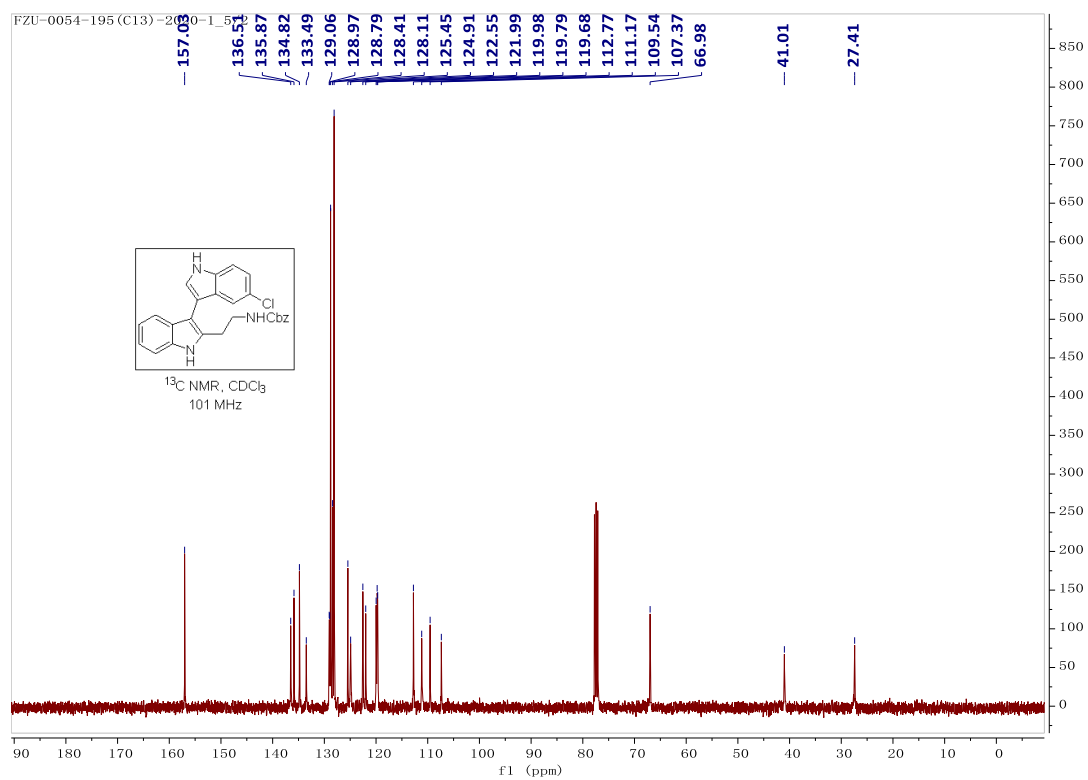

### <sup>1</sup>H NMR Spectrum of 15

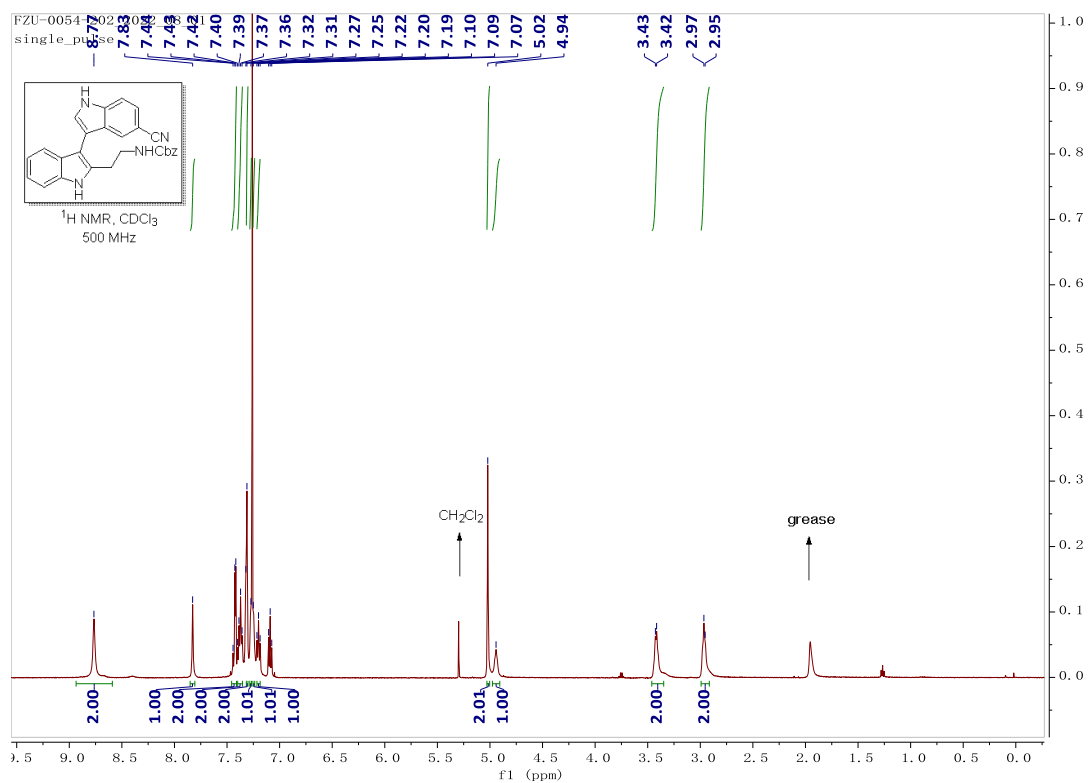

### <sup>13</sup>C NMR Spectrum of 15

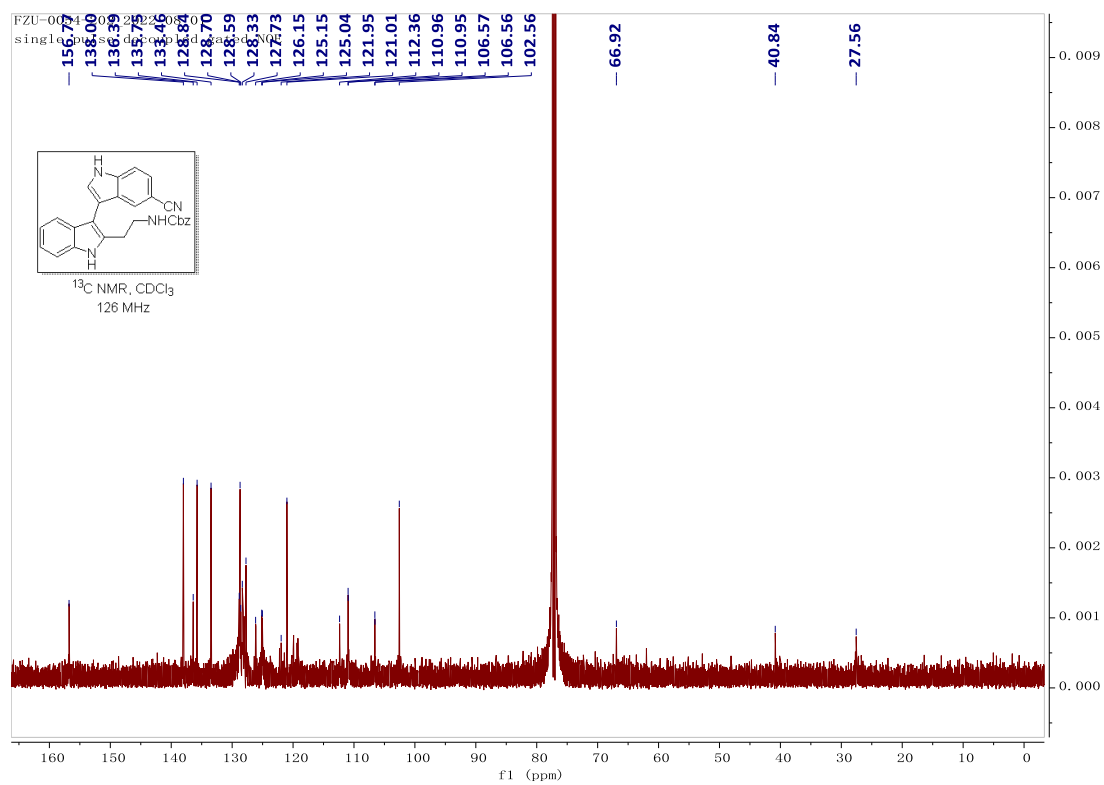

### <sup>1</sup>H NMR Spectrum of 16

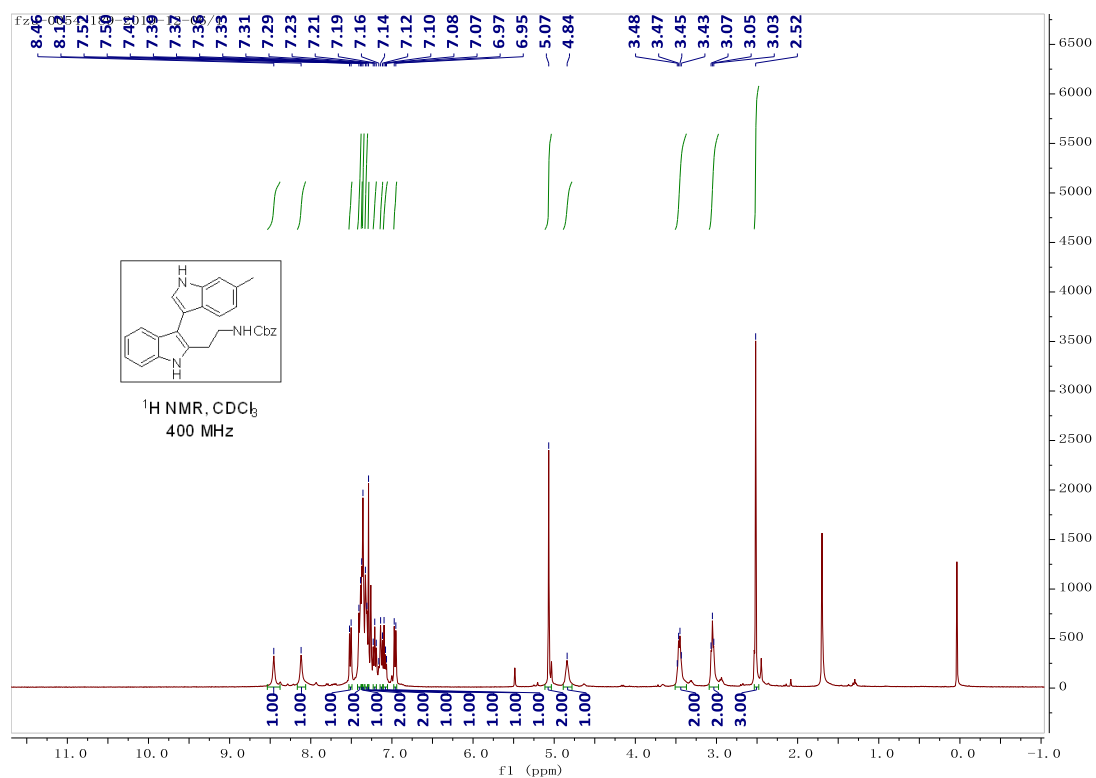

### <sup>13</sup>C NMR Spectrum of 16

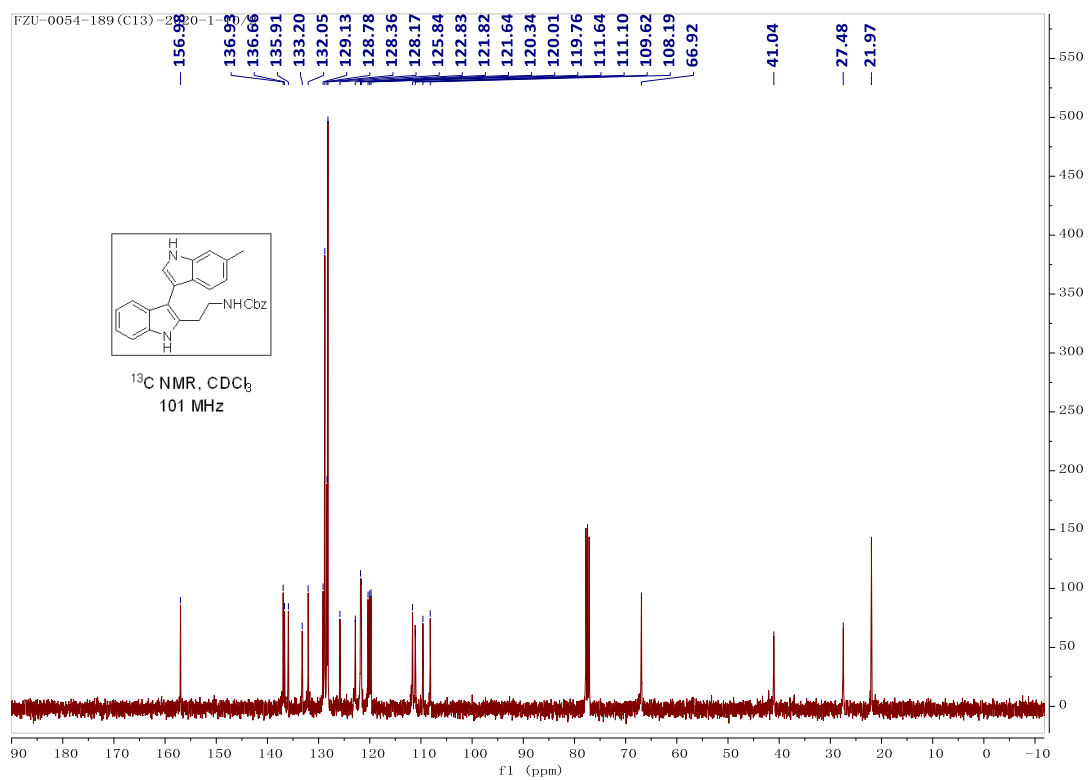

### <sup>1</sup>H NMR Spectrum of 17

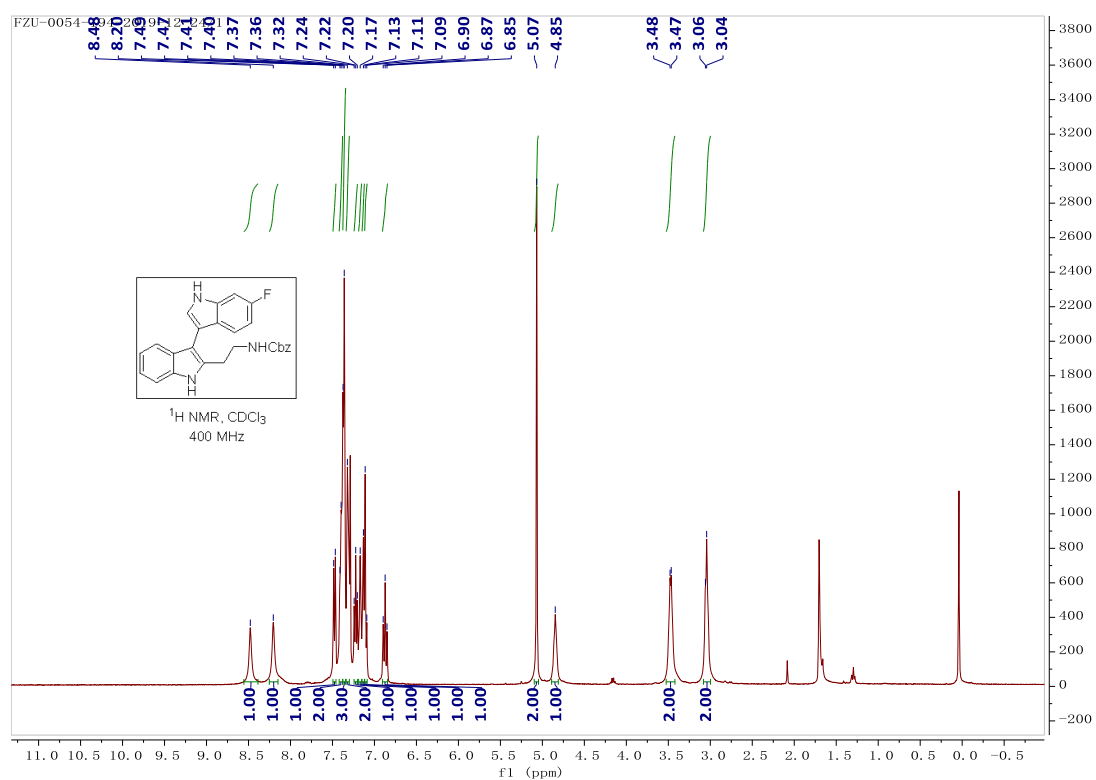

### <sup>13</sup>C NMR Spectrum of 17

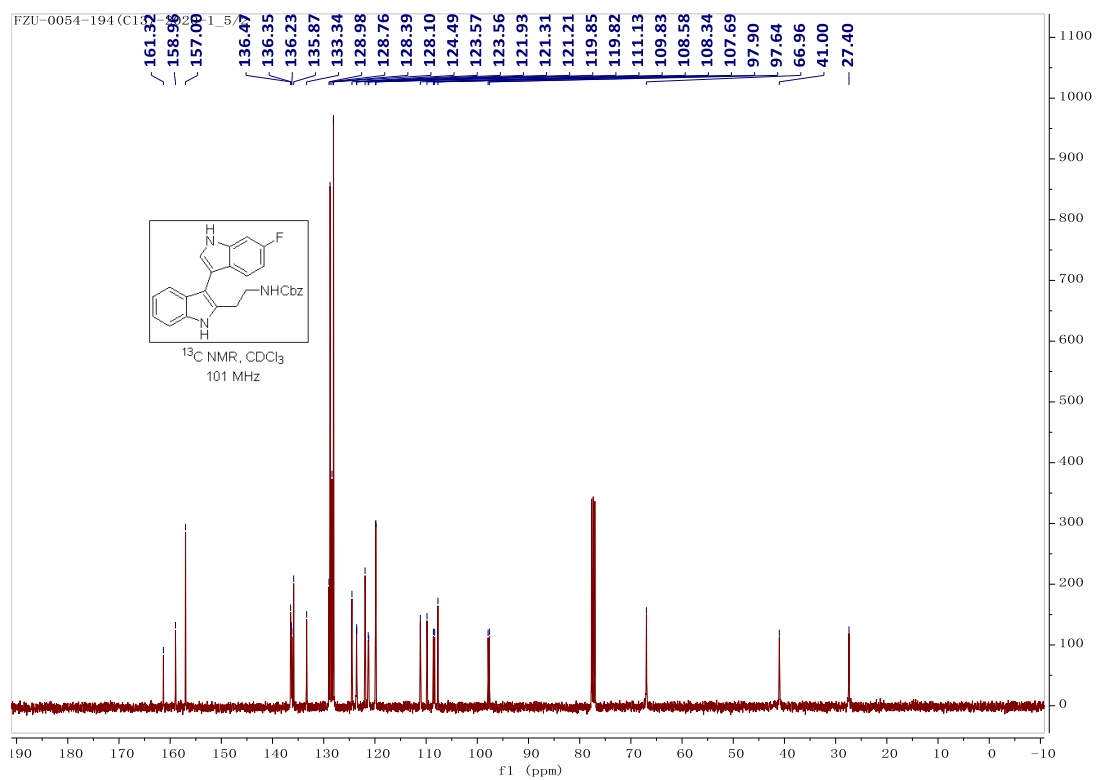

# <sup>19</sup>F NMR Spectrum of 17

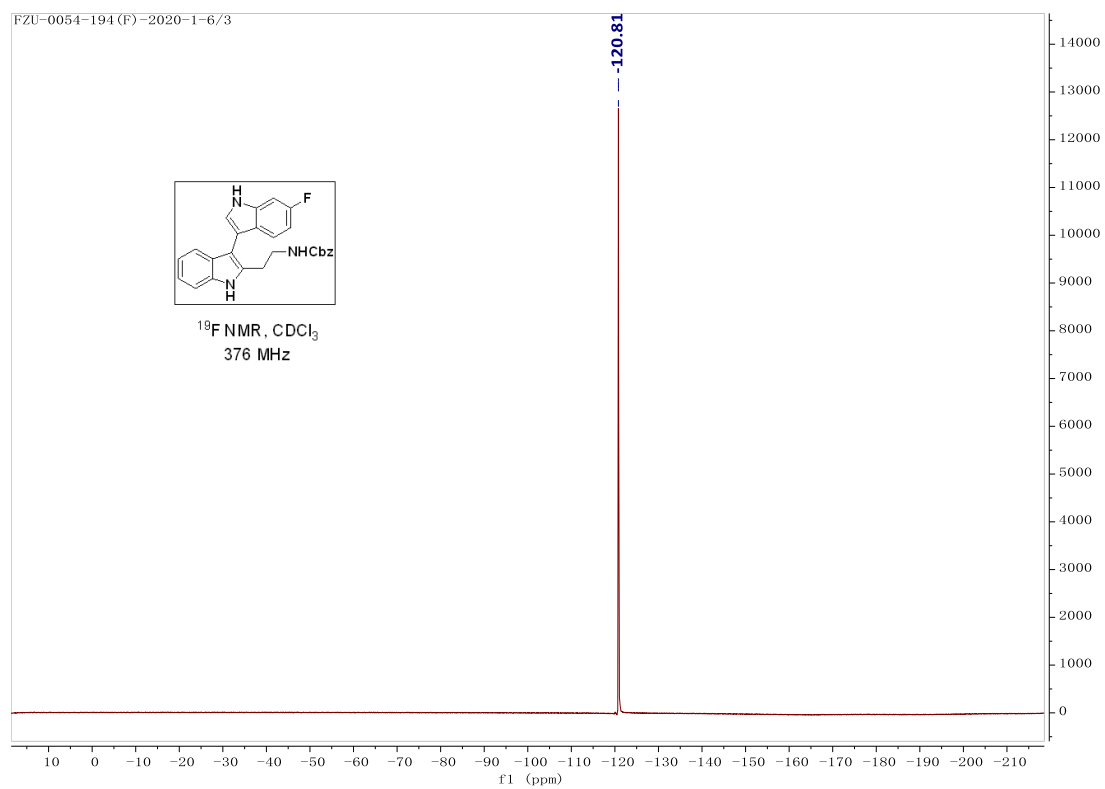



### <sup>1</sup>H NMR Spectrum of 18

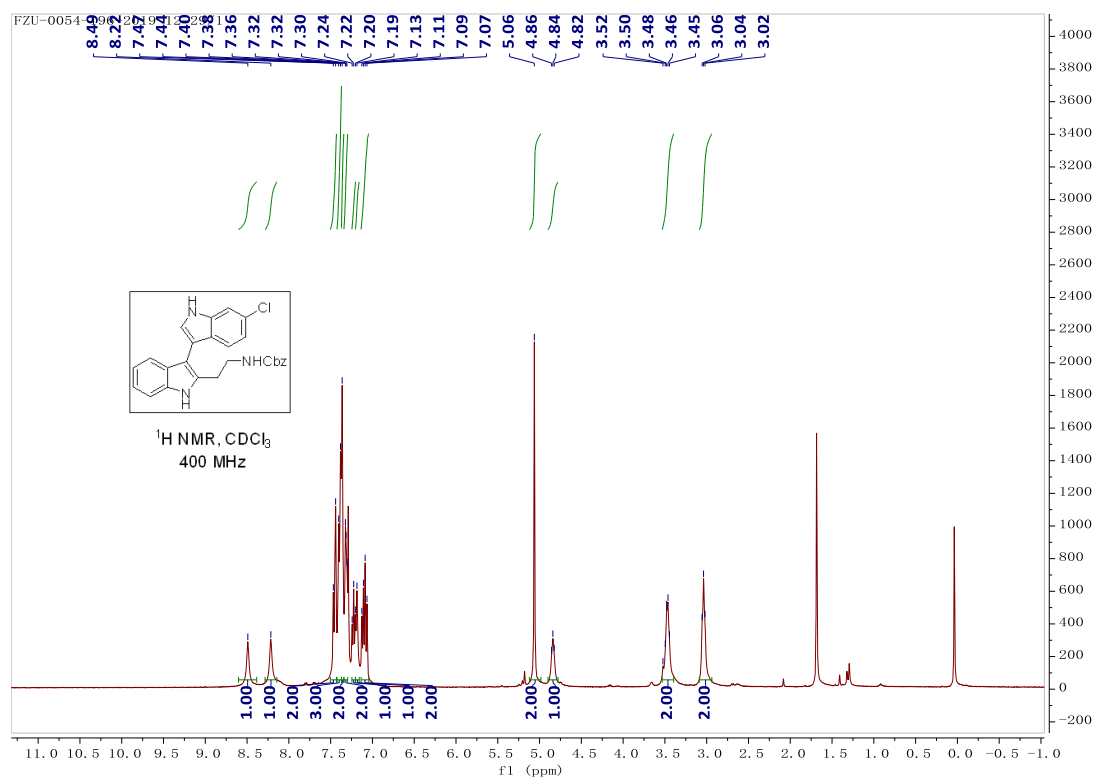

### <sup>13</sup>C NMR Spectrum of 18

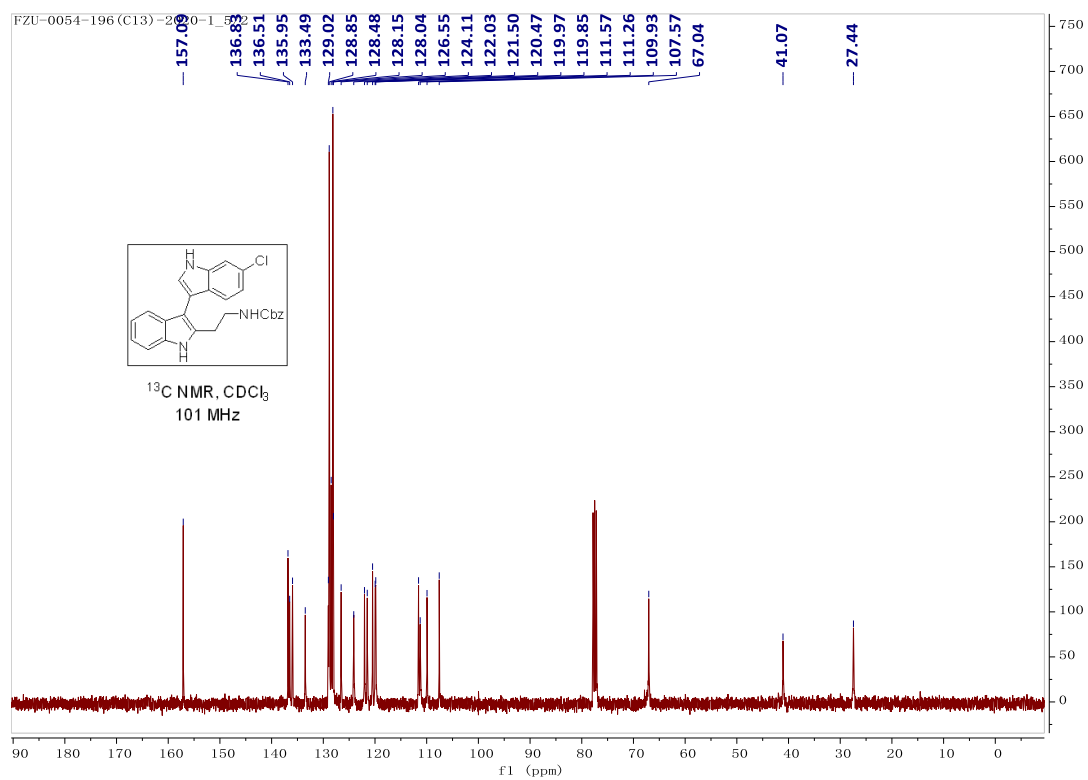

### <sup>1</sup>H NMR Spectrum 19

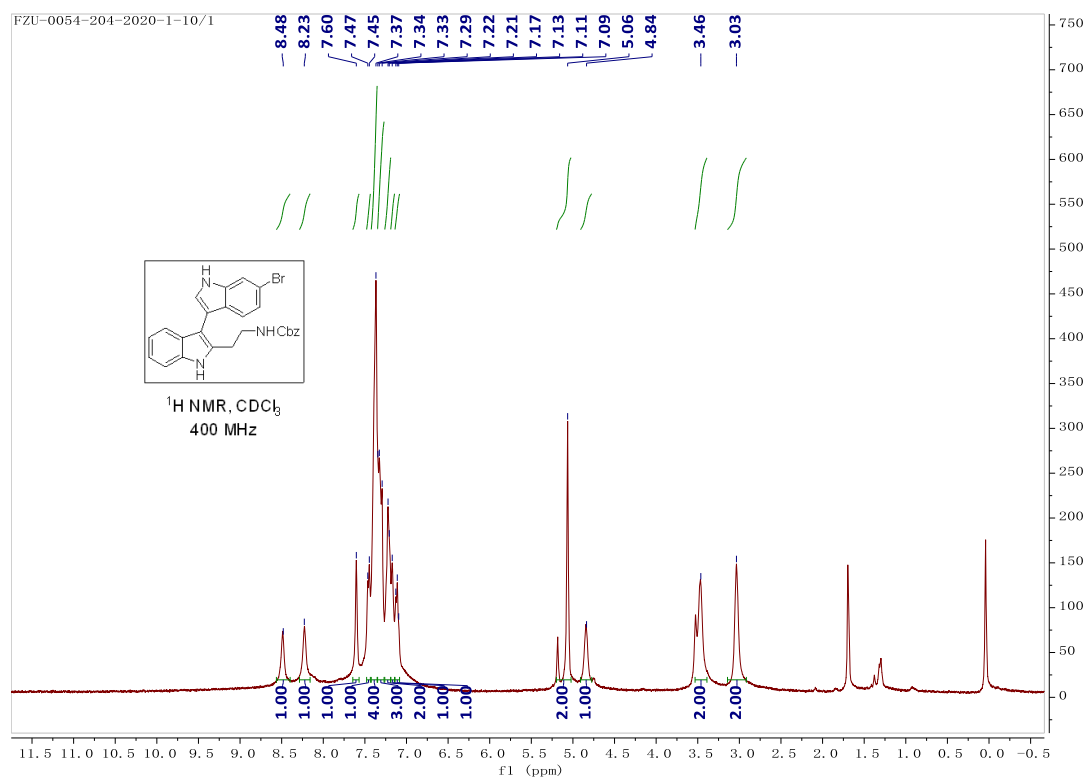

### <sup>13</sup>C NMR Spectrum of 19

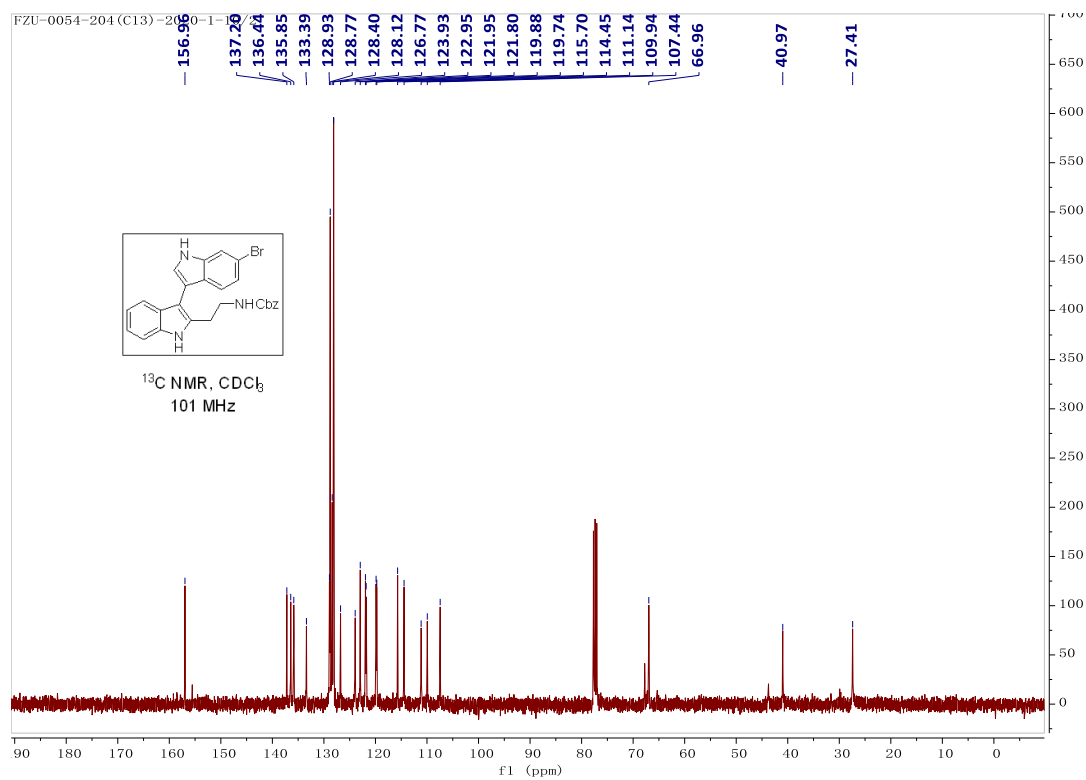

### <sup>1</sup>H NMR Spectrum of 20

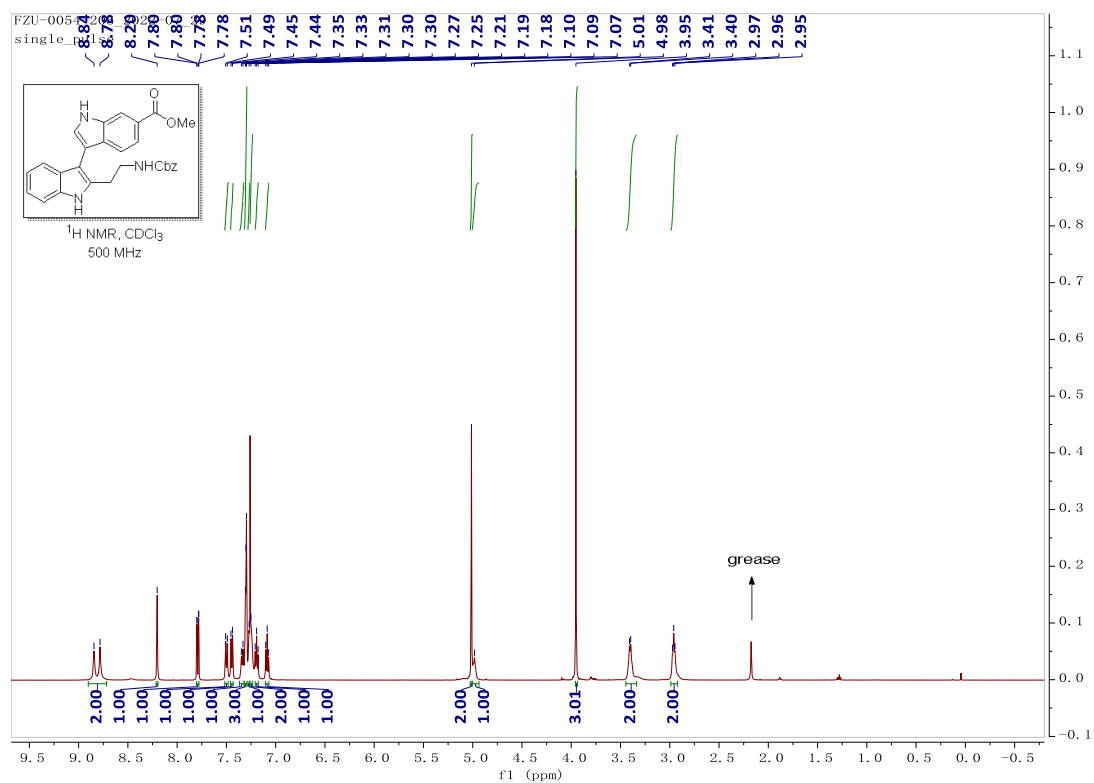

### <sup>13</sup>C NMR Spectrum of 20

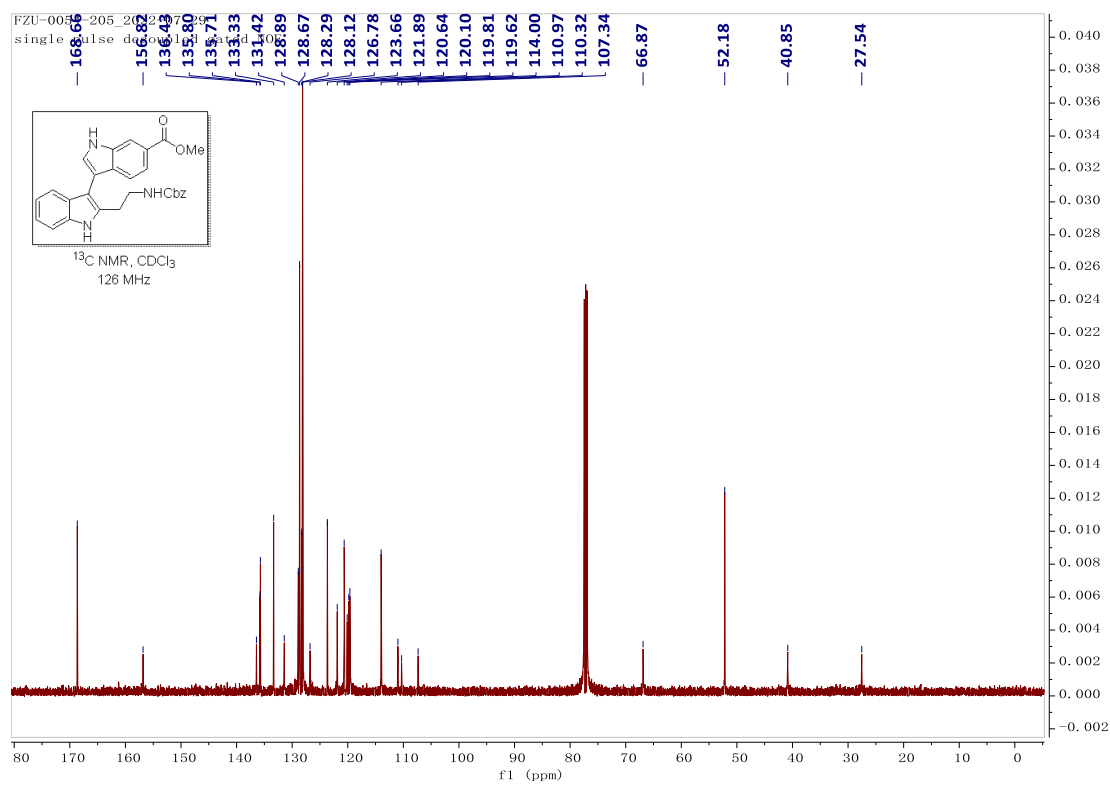

### <sup>1</sup>H NMR Spectrum of 21

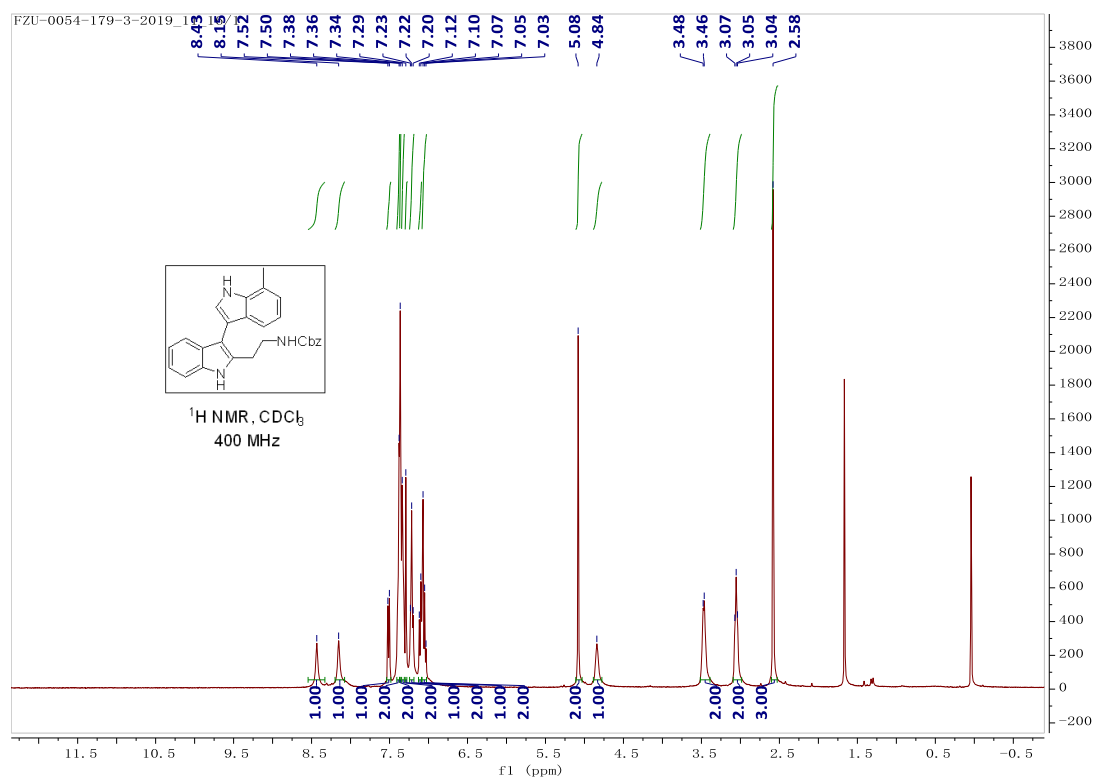

### <sup>13</sup>C NMR Spectrum of 21

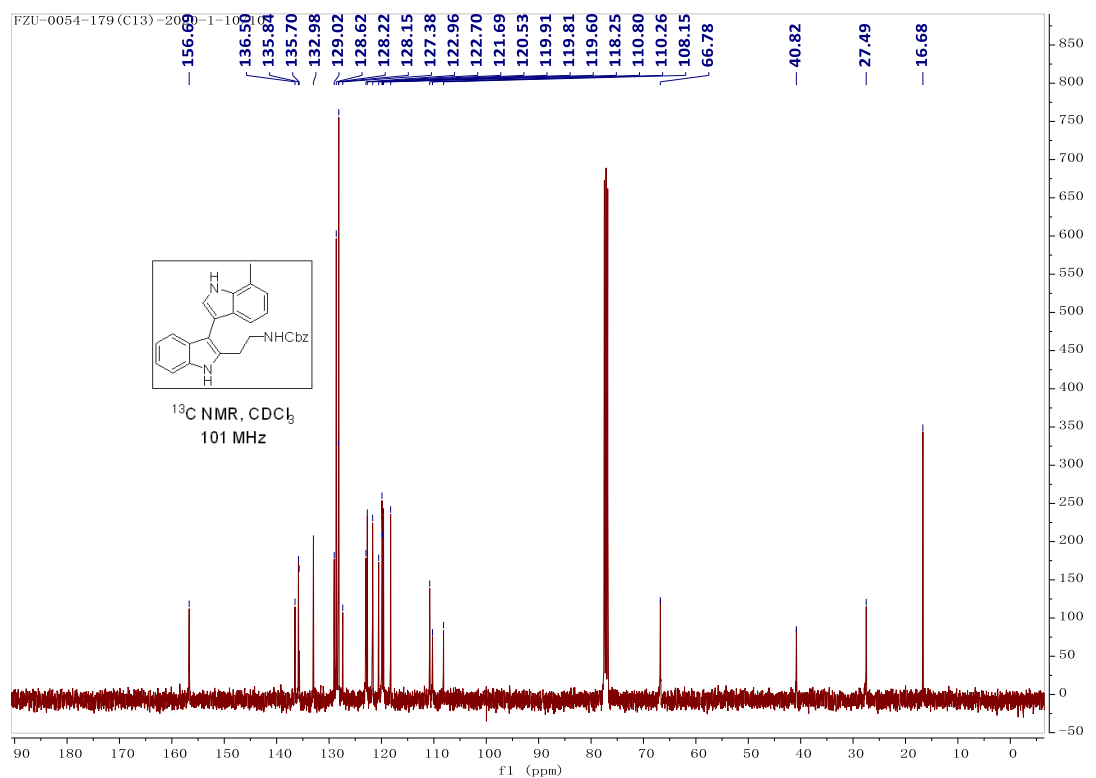

### <sup>1</sup>H NMR Spectrum of 22

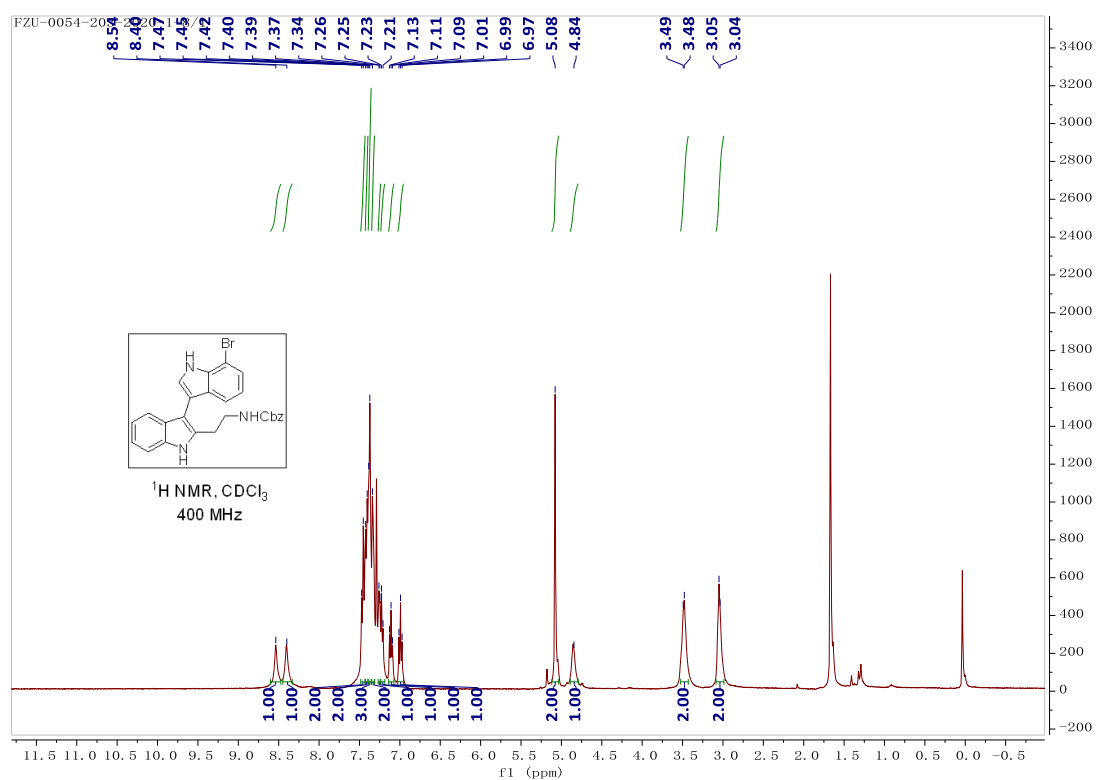

### <sup>13</sup>C NMR Spectrum of 22

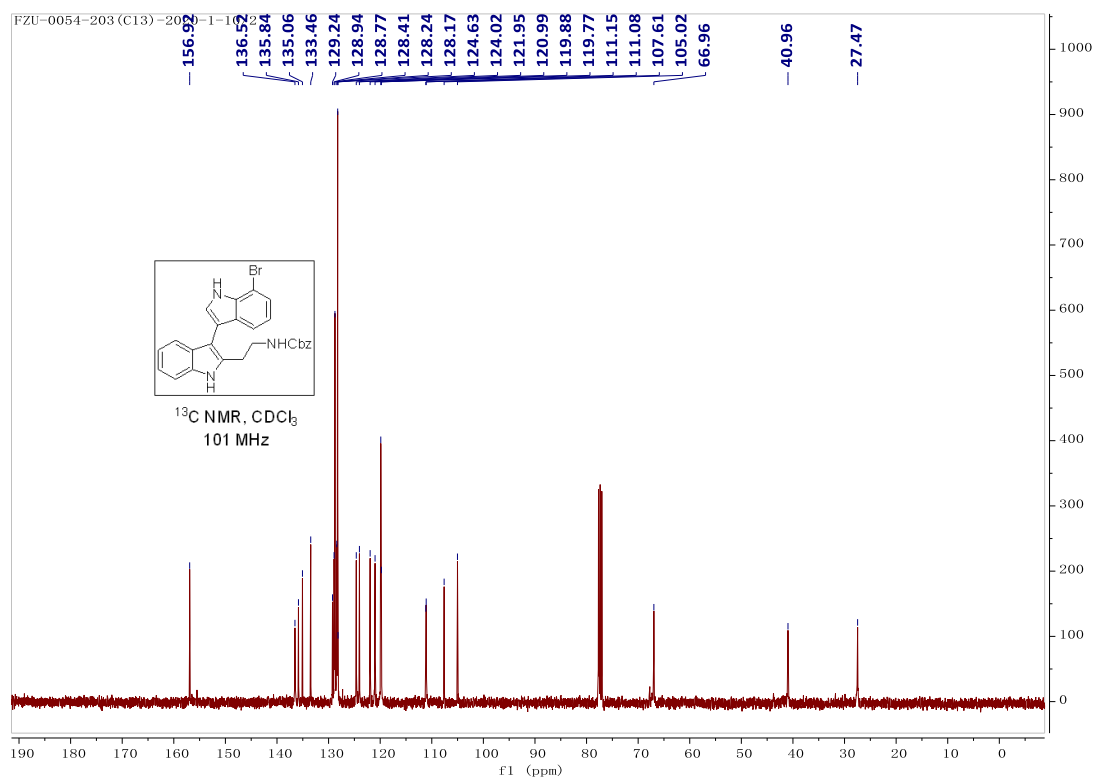

### <sup>1</sup>H NMR Spectrum of 23

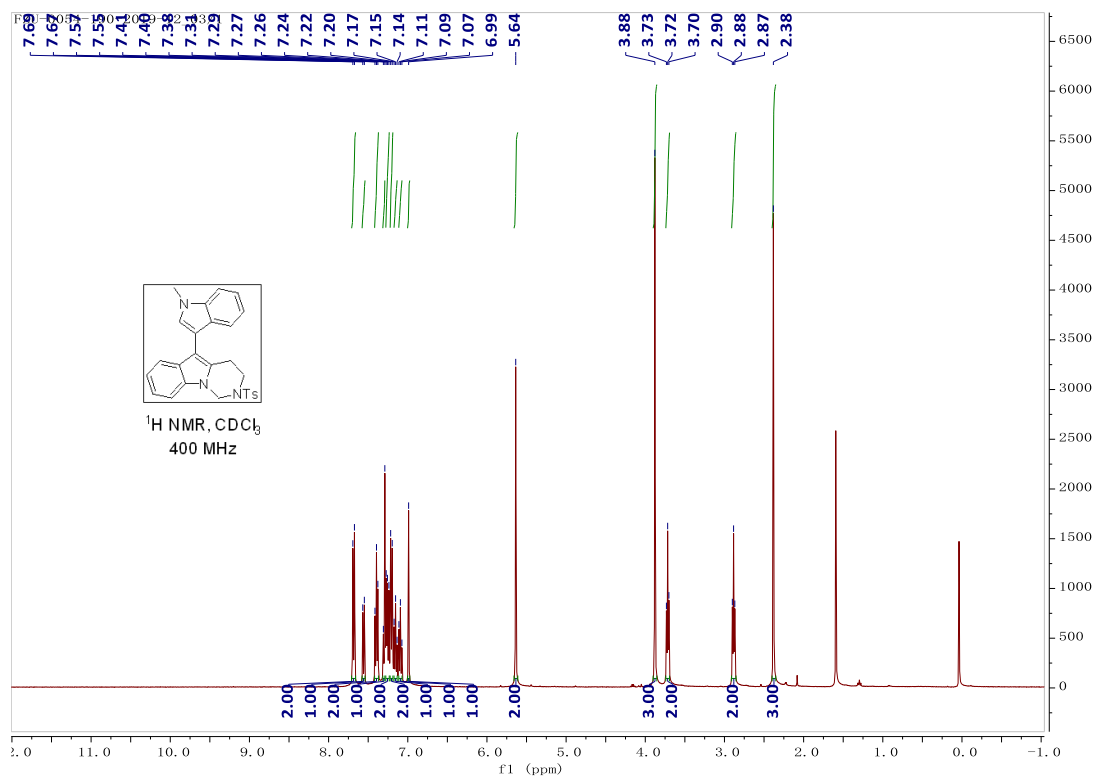

### <sup>13</sup>C NMR Spectrum of 23

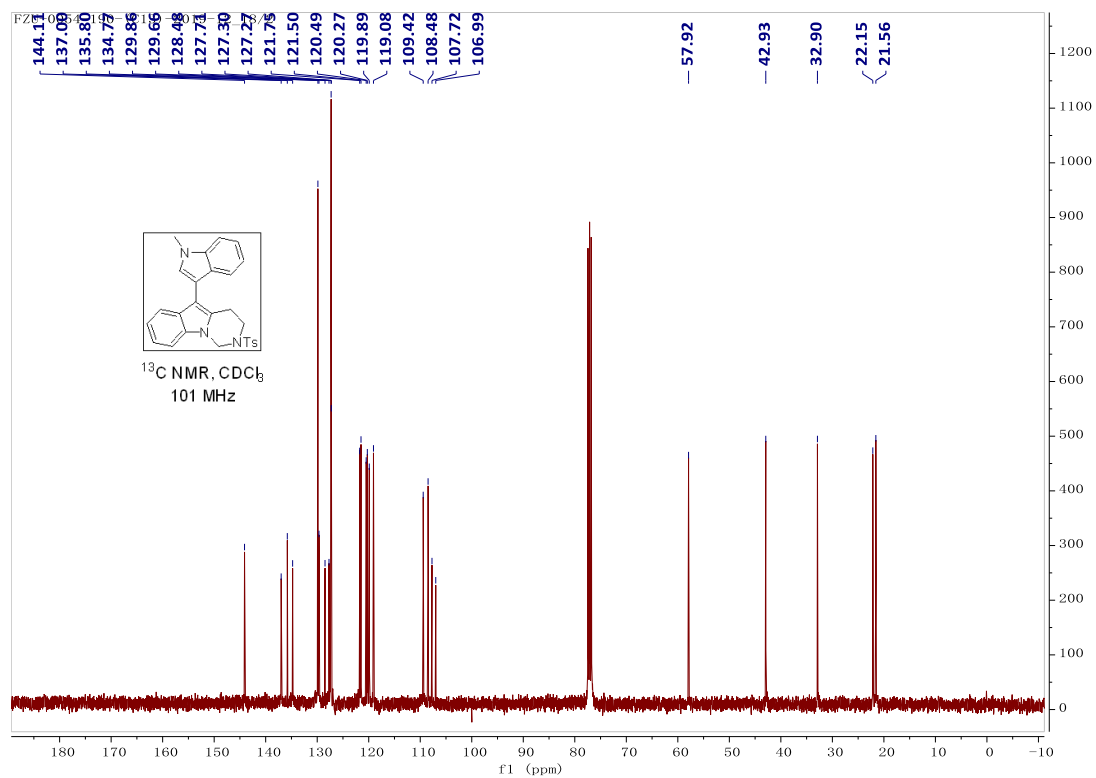

### <sup>1</sup>H NMR Spectrum of 24

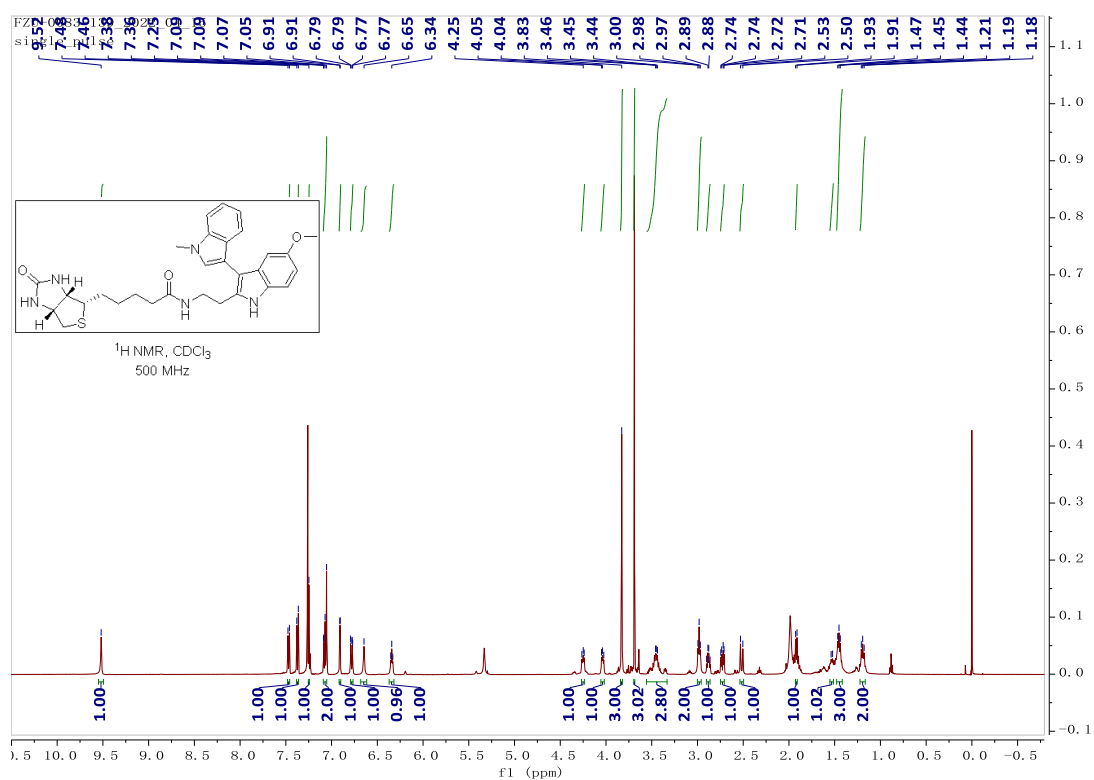

### <sup>13</sup>C NMR Spectrum of 24

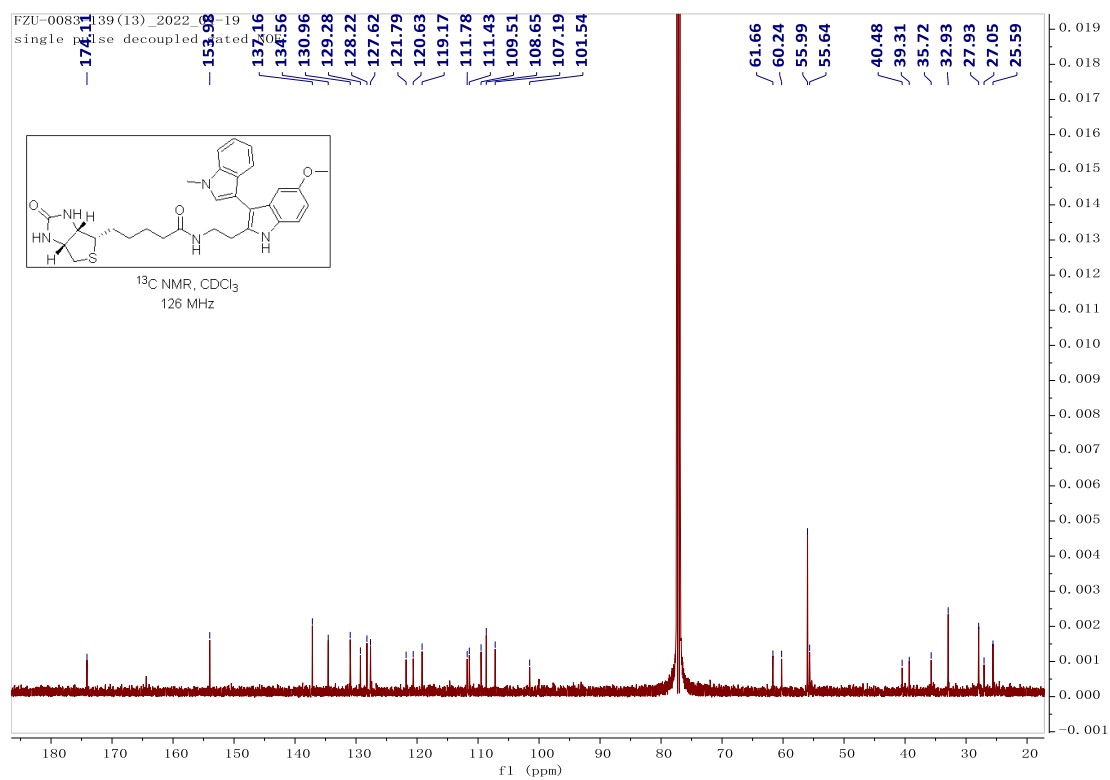

## 7. X-ray Crystal Structure Data

### X-ray Crystal Structure Data for compound 2

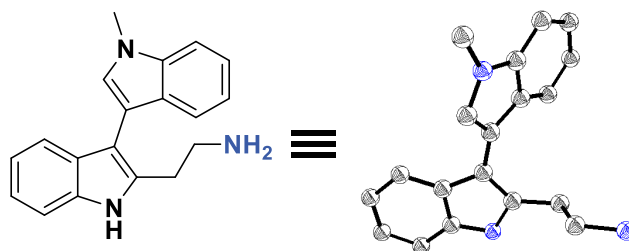

CCDC 1906299

|                     |                                                                                           |                    |
|---------------------|-------------------------------------------------------------------------------------------|--------------------|
| Identification code | 2                                                                                         |                    |
| Bond precision      | C-C = 0.0031 Å                                                                            | Wavelength=1.34139 |
| Cell                | a=7.1136(3) b=8.1451(3) c=13.7212(5)<br>alpha=80.702(3) beta=83.059(3)<br>gamma=78.561(3) |                    |
| Temperature         | 170 K                                                                                     |                    |
|                     | Calculated                                                                                | Reported           |
| Volume              | 765.74(5)                                                                                 | 765.74(5)          |
| Space group         | P -1                                                                                      | P -1               |
| Hall group          | -P 1                                                                                      | -P 1               |
| Moiety formula      | C19 H19 N3                                                                                | C19 H19 N3         |
| Sum formula         | C19 H19 N3                                                                                | C19 H19 N3         |
| Mr                  | 289.37                                                                                    | 289.37             |
| Dx,g cm-3           | 1.255                                                                                     | 1.255              |
| Z                   | 2                                                                                         | 2                  |
| Mu (mm-1)           | 0.372                                                                                     | 0.376              |
| F000                | 308.0                                                                                     | 308.0              |
| F000'               | 308.60                                                                                    | /                  |
| h,k,lmax            | 8,9,16                                                                                    | 8,9,16             |
| Nref                | 2910                                                                                      | 2900               |
| Tmin,Tmax           | 0.987,0.993                                                                               | 0.578,0.751        |
| Tmin'               | 0.963                                                                                     | /                  |
| Data completeness   | 0.997                                                                                     |                    |
| Theta(max)          | 55.001                                                                                    |                    |
| R(reflections)      | 0.0605( 2010)                                                                             |                    |
| wR2(reflections)    | 0.1793( 2900)                                                                             |                    |
| S                   | 1.044                                                                                     |                    |
| Npar                | 208                                                                                       |                    |



## X-ray Crystal Structure Data for compound 23

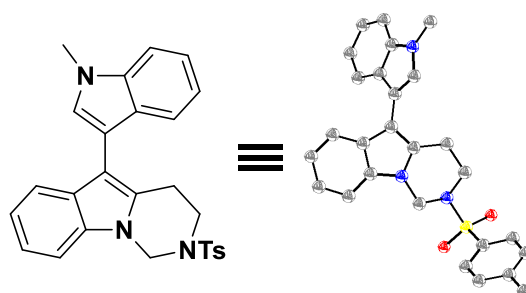

CCDC 1976118

|                     |                                                                                            |                 |
|---------------------|--------------------------------------------------------------------------------------------|-----------------|
| Identification code | 23                                                                                         |                 |
| Bond precision      | C-C = 0.0032 Å Wavelength=0.71073                                                          |                 |
| Cell                | a=9.3339(6) b=10.3228(7) c=12.9971(9)<br>alpha=88.652(2) beta=69.740(2)<br>gamma=77.801(2) |                 |
| Temperature         | 293 K                                                                                      |                 |
|                     | Calculated                                                                                 | Reported        |
| Volume              | 1146.61(13)                                                                                | 1146.61(13)     |
| Space group         | P -1                                                                                       | P -1            |
| Hall group          | -P 1                                                                                       | -P 1            |
| Moiety formula      | C27 H25 N3 O2 S                                                                            | ?               |
| Sum formula         | C27 H25 N3 O2 S                                                                            | C27 H25 N3 O2 S |
| Mr                  | 455.56                                                                                     | 455.56          |
| Dx,g cm-3           | 1.319                                                                                      | 1.319           |
| Z                   | 2                                                                                          | 2               |
| Mu (mm-1)           | 0.171                                                                                      | 0.171           |
| F000                | 480.0                                                                                      | 480.0           |
| F000'               | 480.43                                                                                     | /               |
| h,k,lmax            | 11,12,16                                                                                   | 11,12,16        |
| Nref                | 4514                                                                                       | 4501            |
| Tmin,Tmax           | 0.966,0.986                                                                                | 0.644,0.746     |
| Tmin'               | 0.966                                                                                      | /               |
| Data completeness   | 0.997                                                                                      |                 |
| Theta(max)          | 25.996                                                                                     |                 |
| R(reflections)      | 0.0457( 3420)                                                                              |                 |
| wR2(reflections)    | 0.1203( 4501)                                                                              |                 |
| S                   | 1.042                                                                                      |                 |
| Npar                | 301                                                                                        |                 |
